# Supplementary material
Source: PubMed Central journal article supplement (PMC3557088)
Supplement: 1214168110_sapp.pdf [file 1214168110_sapp.pdf]

## *Supplementary Information*

# **The histone methyltransferase MLL3 contributes to genome-scale circadian transcription**

Utham K. Valekunja, Rachel S. Edgar, Malgorzata Oklejewicz, Gijsbertus T. van der Horst, John S. O'Neill, Filippo Tamanini, Daniel J. Turner and Akhilesh B. Reddy\*

\* Correspondence should be addressed to ABR

Tel: +44 1223 769038  
E-mail: [abr20@cam.ac.uk](mailto:abr20@cam.ac.uk)

### **Included:**

Materials and Methods  
Supplementary Figures S1-S8  
Supplementary Tables S1-S7

## Materials & Methods

### Chromatin immunoprecipitation (ChIP)

All animal experimentation was licensed by the Home Office under the Animals (Scientific Procedures) Act, 1987. Liver tissue was harvested from  $n=4$  adult male C57Bl/6 mice once every 3 hours on the second cycle after transfer from 12L:12DR to DR:DR (L, light [ $220 \mu\text{W cm}^{-2}$ ] and DR, dim red light [ $< 5 \mu\text{W cm}^{-2}$ ]) and immediately frozen and then stored at  $-80^\circ\text{C}$  prior to use. Prior to sampling, animals were stably entrained to a 12 h L: 12 h DR cycle for 3-4 weeks.

Liver tissue (30mg per final ChIP) was rapidly chopped into small (approx. 5 mm x 5mm x 2.5mm cubes) whilst defrosting using a sterile scalpel and immediately submerged in 4% formaldehyde (Sigma) and incubated at room temperature with gentle shaking for 10 mins. Glycine (1.25M) was added to a final concentration of 125 mM and incubated for a further 10 mins to quench the formaldehyde. Tissue was then dounce homogenised briefly to break up the tissue and then passed through a 100  $\mu\text{m}$  cell strainer (BD Biosciences) and a cell suspension harvested. The cells were washed in ice cold phosphate-buffered saline (PBS) and then incubated with 2ml Farnham Lysis Buffer (5 mM PIPES pH 8.0, 85 mM KCl, 0.5% NP40, Roche Complete Protease Inhibitor Cocktail) at  $4^\circ\text{C}$  for 15 mins to release nuclei. After spinning down, pelleted nuclei were then lysed with 1ml RIPA Buffer (1xPBS, 1% NP40, 0.5% Sodium Deoxycholate, 0.1% SDS, Roche Complete Protease Inhibitor Cocktail) and incubated for a further 15 mins at  $4^\circ\text{C}$ . Chromatin was sheared using a Diagenode Bioruptor at  $4^\circ\text{C}$ , using conditions optimised to produce 150-300bp fragments with the use of 15 ml Falcon tubes holding 2ml of lysate each (30 cycles of 30 secs on HIGH, 30 secs OFF). Sheared chromatin was transferred to 1.5 ml microcentrifuge tubes and spun at 14,000 rpm for 15 min at  $4^\circ\text{C}$  to pellet debris. Cleared supernatants were transferred to clean microcentrifuge tubes and 100  $\mu\text{l}$  from each sample lysate was saved for use as an input control for sequencing and to check fragment size distribution.

For each liver from  $n=4$  animals per time-point, duplicate ChIPs were performed with each antibody. ChIP-grade antibodies were purchased from Abcam (UK): anti-H3K4me3 (ab8580), anti-H3K9me3 (ab8898) and anti-Histone H3 (ab1791). 50  $\mu\text{l}$  of Protein G magnetic beads (Dyna/Invitrogen) were washed three times (in 1 ml 1XPBS/1% BSA) and

then incubated with 5 µg antibody in 300 µl volumes (diluted in PBS/BSA) for 4 hours at 4°C on a rotator. Excess, or non-specifically bound, antibody was removed by washing a further three times in PBS/BSA. The beads were then added to 900 µl of sheared chromatin in 1.5 ml DNA Lo-bind tubes (Eppendorf) and incubated at 4°C overnight with gentle rotation. Beads were washed six times in 1 ml LiCl Wash Buffer (100 mM Tris, 500 mM LiCl, 1% NP40, 1% Sodium Deoxycholate) for 3 min each, followed by a brief wash in Tris-EDTA (TE) buffer, pH 7.4. The beads were then suspended in TE, transferred to a clean microcentrifuge tube, and TE was removed. 200 µl of IP Elution Buffer (1% SDS and 100 mM NaHCO<sub>3</sub>) was added at room temperature and then the beads were incubated for 45 mins at 65°C with continuous shaking on a thermomixer (at 800 rpm). The eluate was then removed from the beads and incubated overnight at 65°C to reverse cross-linking. DNA was extracted using a Qiagen Minelute PCR purification kit (using 12 µl of Buffer EB to elute DNA) and then quantified using Picogreen assays (Invitrogen) in a microplate as per the manufacturer's instructions. Input chromatin was reverse cross-linked in parallel and assayed with a Nanodrop spectrophotometer (because of the much higher DNA concentration) and a sample was run on a 2% agarose gel to check fragment size distributions were correct.

### **Multiplex Library Preparation & Sequencing**

For H3K4me3, H3K9me3, Histone H3 and input DNA samples, these were prepared for sequencing on an Illumina Genome Analyzer II following the manufacturer's recommended library preparation protocol using 50 ng of ChIPed DNA, except that a custom adapter was used, the PCR was performed using indexed reverse primers in a high-efficiency amplification step, and the size selection step was performed after the PCR (1-3). For MLL3 ChIP in liver tissue or mouse embryonic fibroblasts (MEFs), standard Illumina indexing primers were used, as per the manufacturer's instructions. All libraries were multiplexed, and 4 indexed pooled samples (corresponding to four time-points, CT0, 6, 12, 18) sequenced per lane.

### **Bioinformatics: Alignment and Peak Detection**

Analysis was performed using the Darwin Supercomputer of the University of Cambridge High Performance Computing Service (<http://www.hpc.cam.ac.uk/>), provided by Dell Inc. using Strategic Research Infrastructure Funding from the Higher Education Funding Council for England. Raw paired-end 50bp reads (in FASTQ format) were aligned to the UCSC mm9 genome build with Bowtie (<http://bowtie-bio.sourceforge.net/index.shtml>) using pre-built

indexes downloaded from the host website (4-6). Parameters were optimised to utilise the software's multi-threading capabilities (we typically used a 128-core cluster for alignments). Alignment files were then converted from the standard Bowtie output format to ALN files (for use with Cisgenome) using a custom Perl script. Alignments were then analysed using a 2-sample comparison (ChIPed sample vs. Input control for each time-point) with Cisgenome v1, using a cut-off false discovery rate of 10% and a sliding window size of 100 (7-9). Output files were converted into various formats for browsing datasets and to display data. The Cisgenome and UCSC browsers were used for data visualisation, using custom tracks (1, 7, 10). Raw sequence data (FASTQ format), alignments (Bowtie format) and peak data (as Cisgenome/Affymetrix BAR format) are deposited on the NCBI GEO database (Accessions: GSE23550 and GSE37396) and are MINSEQE-compliant.

### **Microarrays**

Total RNA was isolated from liver samples of C57/Bl6 mice over a circadian time course as previously described (4). Per time point,  $n=3$  biological replicate samples were collected and processed individually. RNA from each individual biological replicate sample was hybridized on an Affymetrix mouse Gene ST1.0 microarray (Accession: GSE37396), using the manufacturer's protocol.

### **Microarray Data Analysis**

Microarray analysis was performed using GeneSpring GX 11, with intensity values being normalized using the Robust Multi-array Average (RMA) algorithm. Data from a recent high-temporal resolution microarray study performed by the Hogenesch and Panda laboratories was used to determine the transcriptional profiles of genes with rhythmic histone methylation patterns (7). Genes with statistically significant ChIP-seq peaks at each time-point were checked against a list of rhythmic transcripts and their Affymetrix IDs, COSOPT/Fisher G-test q-values and period estimates were obtained (see Supplementary Table 1). Data were obtained from the NCBI GEO database (Accession: GSE11923) and the associated paper (2, 7).

### **Validation of ChIP with Real-time PCR (qPCR)**

We performed ChIP on a separate set of liver samples (from animals from the same cohort) using 5  $\mu\text{g}$  per ChIP of the anti-histone antibodies above, and also normal rabbit IgG (Cell Signaling Technology #2729) as a negative control for comparison. We performed real-time

PCR using SYBR green master mix (Applied Biosystems) with primers as below. Compared to IgG and input chromatin, all gave a significant (approx. 5-10 fold) enrichment at the positive loci examined, and no enrichment at selected negative loci. Primers were designed with Primer3Plus software using its standard parameters for qPCR, with an amplicon length of 75-125 bp:

| Histone | Time-point | Forward Primer        | Reverse Primer         | Closest Gene  | Amplicon size |
|---------|------------|-----------------------|------------------------|---------------|---------------|
| H3K4me3 | CT0        | TACATGCCAGCGAACAAGAC  | GCCTAATTGCAGGGAGAAAC   | Defb7         | 122           |
| H3K4me3 | CT0        | TCTGCCCTCCTCAGCAAATC  | CATCGTTGGTACGGTTCAAG   | Pdia4         | 92            |
| H3K4me3 | CT6        | CCTCCGTGCCTGAGAGAC    | GGAGACATAGCTGGGTGGTC   | Tmem64        | 94            |
| H3K4me3 | CT6        | TACACAGATCCTGGGCCTTC  | CAGCAAAACGCTGAGAACAA   | A930016P21Rik | 96            |
| H3K4me3 | CT12       | TCATCTAGATTGCGCGACAC  | TAGATAGTGGCGGGTTCTG    | Ipo9          | 76            |
| H3K4me3 | CT12       | GCAAGGAGGGAGAAGACACA  | CGAAGGGTCTCTGAATGCTC   | Aftph         | 112           |
| H3K4me3 | CT18       | CGTGGACCTCACAACATCAT  | TGGGTGAACCCAACTTTAC    | Ndufb5        | 102           |
| H3K4me3 | CT18       | GAGGAAGAGGGACCAAACC   | GGTTGTTGACACGGACTCCT   | Tcf25         | 79            |
| H3K9me3 | CT0        | CCCTGTCTCGAAAACCAAAA  | TGGCCATGACAATACCAAAA   | Zc3h7a        | 95            |
| H3K9me3 | CT0        | TGCCTTGAGGAAATGAGCTT  | CCAGACCACCCAAGCTTAAA   | 3110007F17Rik | 79            |
| H3K9me3 | CT6        | TCCTTGCCATATTCAGGTC   | GAGAAACATCCACTTGACAACG | Alkbh8        | 97            |
| H3K9me3 | CT6        | GAGTCTTGGTCTGTGAA     | TCCTCCATCCACCATTTTA    | Rbmy1a1       | 82            |
| H3K9me3 | CT12       | GACATGAGAGGGGAGGACTG  | TATGCCCTCATTGCACTTCA   | C230081A13Rik | 93            |
| H3K9me3 | CT12       | GCCATGCATGTCTAAGTACGC | GCGACCAAAGGAACCATAAC   | Pgk2          | 81            |
| H3K9me3 | CT18       | GCATCCATCCCTGAAAAGAC  | CTGAGACTCACGTTTTCTTCC  | Sp110         | 100           |
| H3K9me3 | CT18       | TCGGAGGGAACCGACTACTA  | CCAGAGGAAACTCTGGTGGA   | 4631422O05Rik | 113           |

### Real-time PCR (qPCR) for gene expression analysis

RNA from individual livers (see above ChIP methods) was extracted with TRIzol reagent (Invitrogen) and purified with RNAeasy Mini Kits (Qiagen). Total RNA was then used for reverse transcription via a High Capacity cDNA Archive Kit (Applied Biosystems). The resulting cDNA was then diluted 1:5 and used in duplicate 10 µl PCR reactions according to the manufacturer's protocol (TaqMan Gene Expression Master Mix, Applied Biosystems) with validated Taqman Gene Expression Assays (Applied Biosystems). For control reactions, mouse  $\beta$ -actin mRNA was amplified from the same samples. Real-time PCR was performed with an ABI 7900HT (Applied Biosystems) system. The relative levels of each mRNA were calculated by the  $2^{-\Delta\Delta C_t}$  method ( $C_t$  stands for the cycle number at which the signal reaches the threshold of detection) and normalized to the corresponding  $\beta$ -actin mRNA levels. One-way ANOVA analysis was performed on data for each gene profile by Graphpad Prism v5 software, and post hoc Bonferroni tests were performed as required. The following assays were employed:

| Gene                   | Taqman Assay Number |
|------------------------|---------------------|
| Arntl (Bmal1)          | Mm_00500226_m1      |
| Mll3                   | Mm_01156964_m1      |
| Actb ( $\beta$ -actin) | Mm_00607939_s1      |

For mouse embryonic fibroblast (MEF) time courses, pre-mRNA and mature mRNA were assayed in duplicate reactions, for three biological replicate samples, as described previously (5, 11).

### **Gel Electrophoresis and Immunoblotting**

Wild-type and *mCry1* *-/-* *mCry2* *-/-* animals (C57Bl/6 background, 12 weeks old) were individually housed under 12-hour light, 12-hour dark cycles (LD 12:12) and constant temperature (21±2°C). Livers from animals were harvested every 4 hours over the 24h cycle (ZT0, 4, 8, 12, 16, 20), flash-frozen and stored at -80°C. Lysates from ground-up livers were prepared using Chaps/Urea buffer (8M Urea, 4% Chaps, 5mM Magnesium Acetate, 10mM Tris pH6). Total protein abundance was determined using RC/DC reagents (Bio-rad) and concentration corrected to 4 µg µl<sup>-1</sup> for all samples. Lysates were diluted with denaturing LDS sample buffer (Invitrogen) with 1:10 β-mercaptoethanol to a final protein concentration 2 µg µl<sup>-1</sup>, and heated to 70°C for 10 mins prior to loading on gels. 10 µg protein per lane was loaded for immunoblotting.

We used NuPAGE Novex 4–12% Bis-Tris gradient gels for Bmal1 and β-actin analyses, and 3-8% Tris-Acetate gels for MLL3 (Life Technologies). Gels were run according to the manufacturer's protocol with a non-reducing MES SDS buffer system (for Bis-Tris gels), or Tris-Acetate SDS Buffer (for Tris-Acetate gels). Protein transfer to nitrocellulose for blotting was performed using the iBlot system (Life Technologies), with a standard (P3, 7 min) protocol for Bis-Tris gels, or an optimised protocol for transferring high-molecular mass proteins from Tris-Acetate gels (P3, 10 min). Nitrocellulose was then washed briefly, and then blocked for 30 min in 0.5% w/w BSA/non-fat dried milk (Marvel) in Tris buffered saline/0.05% Tween-20 (TBST). After three brief washes in TBST, membranes were incubated in antibody diluted in blocking buffer (0.5% milk/BSA) overnight at 4 °C. The following day, membranes were washed for 5 min three times (in TBST) and then incubated with 1:10,000 HRP-conjugated secondary antibody (Sigma-Aldrich) for 30 min. Four more 10-min washes were then performed before performing chemiluminescence detection using Immobilon Western Chemiluminescent HRP Substrate (Millipore). To check protein loading was even in the gels, they were stained with Coomassie SimplyBlue (Life Technologies). The following antibodies were used:

| Antigen        | Manufacturer | Catalogue Number | Dilution used |
|----------------|--------------|------------------|---------------|
| Bmall          | Santa Cruz   | sc-48790         | 1:2,000       |
| MLL3           | Abcam        | ab71200          | 1:1,000       |
| $\beta$ -actin | Santa Cruz   | sc-47778         | 1:5,000       |

### Bioluminescence reporter vectors

Promoter regions from mouse *Bmall* and *Per2* (8, 12) were amplified by PCR, or digested directly from the parent vector for *Cry1* (1, 3), and subcloned into the pGL4.20 vector (Promega) between the *KpnI* and *HindIII* restriction enzyme sites. For *Rev-erba* (*Nr1d1*), a 1,003 bp fragment (mouse chromosome 11:98636454-98637456, mm9 annotation) was amplified by PCR from BAC clone RP23-395E10 and then cloned into pGL4.20 using restriction-free cloning (4, 6). Clones were sequence-verified to confirm correct insert sequences. The following primers were used for cloning PCRs:

| Gene Promoter   | Forward Primer                                                     | Reverse Primer                                                        |
|-----------------|--------------------------------------------------------------------|-----------------------------------------------------------------------|
| <i>Bmall</i>    | CGGCGGGTACCGAGGGATGGGCGAAGAGATG                                    | CGGCGAAGCTTGATCCC GCGGCGGCGGCGGCGGCA                                  |
| <i>mPer2</i>    | CGGCGGGTACCGCCCGAAGTGGACGAGCCTA                                    | CGGCGAAGCTTAGCCGCTAGTCCCAGTAGCG                                       |
| <i>Rev-erba</i> | GCCAAGCTTGGCAATCCGGTACTGTTGGTAAAGCCAC<br>CTGCCAATTCGGGGAGTTGAGGGGT | TGGCGCTGGGCCCTTCTTAATGTTTTGGCATCTTCCA<br>TGCAACCAGGAAGTAAGTAGGTGATGGA |

### Cell culture & bioluminescence assays

Mouse embryonic fibroblasts (MEFs) were cultured in Dulbecco's modified Eagle medium (DMEM) containing 4.5 g  $\Gamma^{-1}$  glucose, 10% (v/v) fetal bovine serum (FBS), 1X Glutamax-I (Invitrogen 35050-038), 100 U penicillin/ml and 100  $\mu$ g  $\text{ml}^{-1}$  streptomycin (Penicillin – Streptomycin Solution, Sigma P0781-100ML). Cells were cultured at 37°C, 5% CO<sub>2</sub> in a standard humidified incubator. To create stable luciferase reporter lines, 1  $\mu$ g of each vector was transfected using GeneJuice® Transfection Reagent (Novagen Cat# 70967-3) and then cells selected for approx. 2 weeks with Puromycin-supplemented medium (final concentration of 2  $\mu$ g  $\text{ml}^{-1}$ ) in 35 mm diameter cell culture dishes.

Bioluminescence assays were performed at 37°C using 96-well plate reader (Berthold CentroLIA LB 960), with an integration time of 56 secs / well, every 90 mins, using a standard protocol (7, 9). Briefly, cells were seeded into white 96-well plates and allowed to grow until fully confluent in supplemented medium (as above), before being synchronised with a dexamethasone shock, at a final concentration of 100 nM for 15 minutes at 37°C (7,

10). After this, cells were incubated in 'air medium' supplemented with luciferin substrate and puromycin for data collection (2, 7, 9, 13). Bioluminescence data traces were analysed with BRASS software (<http://millar.bio.ed.ac.uk/PEBrown/BRASS/BrassPage.htm>).

### **Statistical analysis**

Parametric statistics (1-way and 2-way ANOVA) and  $\chi^2$  tests were performed using Graphpad Prism v5 software.



## Supplementary Figures

**a**

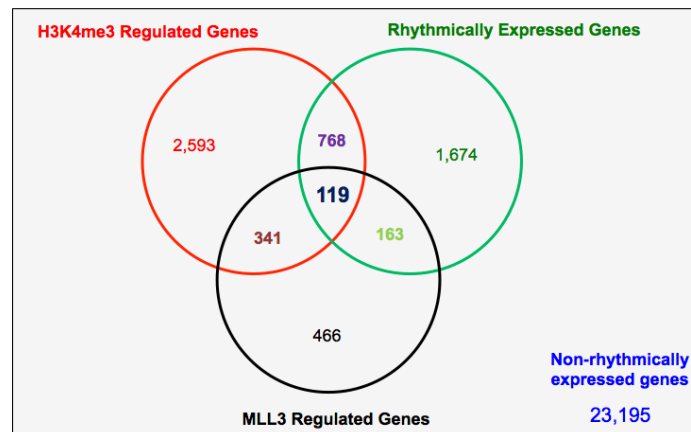

Percentage of total H3K4me sites that are rhythmic =  $(2593+768+119+341)/(23195+2593+768+119+341+1837) = 13.2\%$

**b**

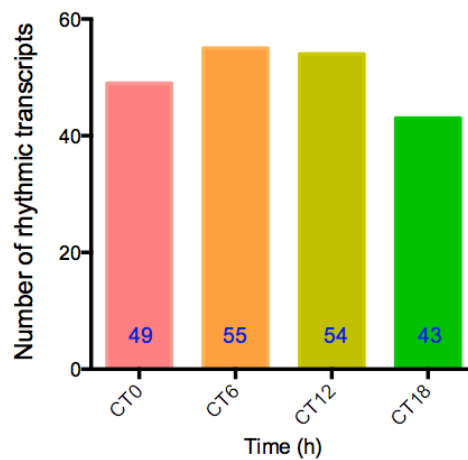

**Supplementary Figure S1 a**, Comparison of loci that exhibit rhythmic histone methylation with circadian transcripts. Venn Diagram showing the number of rhythmically bound H3K4me3 genomic loci and overlap with transcripts that exhibit circadian oscillation in liver tissue, and those bound by MLL3. **b**, Phase distribution of rhythmic transcripts. The numbers of transcripts peaking at each time-point is shown at the base of the respective column.

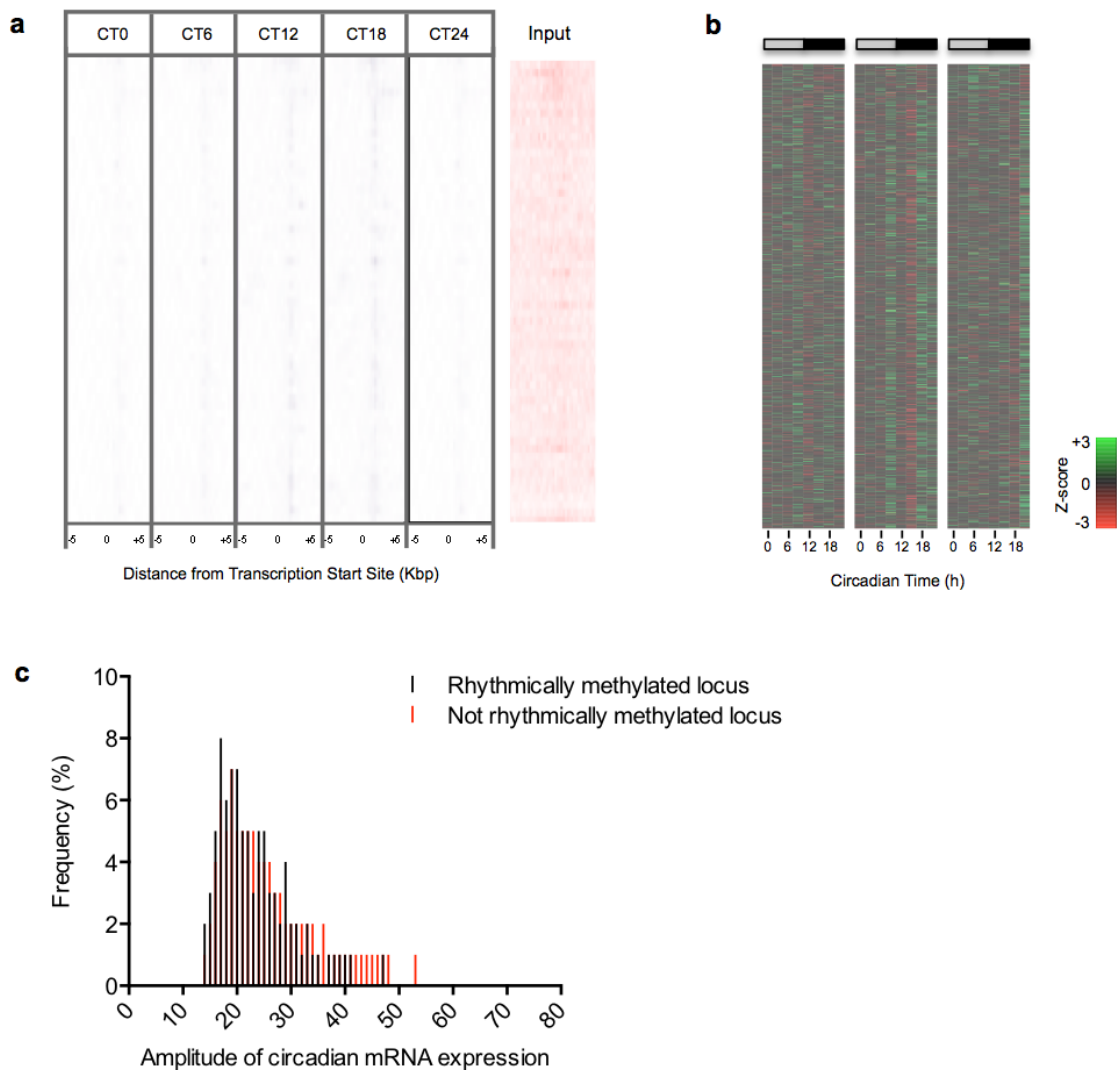

**Supplementary Figure S2 Non-rhythmic H3K4me3 sites correlate with non-rhythmic gene expression and no difference in amplitude distributions for rhythmically-methylated loci.** **a**, Heat map of H3K4me3 binding signal at CT0-18 (with CT0 re-plotted as CT24) from -5 kb to +5 kb surrounding the centre of all the binding sites. Each line represents a single H3K4me3 binding region. The cluster of loci ( $n=900$ ) shown did not show significant H3K4me3 binding peaks at any of the time-points. CT, Circadian Time (animals maintained in constant darkness, with subjective dawn represented by CT0, and dusk represented by CT12). The Input (non-enriched) DNA signal is shown for comparison. **b**, Heat map of the respective genes shown in **a**. Normalized expression is shown for three independent biological replicate sets of liver, sampled every 3 hours in constant conditions. Light grey bars indicate circadian daytime; black bars signify circadian night. **c**, Comparison of amplitudes of circadian mRNAs in the liver that were associated with rhythmic H3K4 trimethylation or not. Amplitudes showed a similar distribution in both cases, as illustrated.

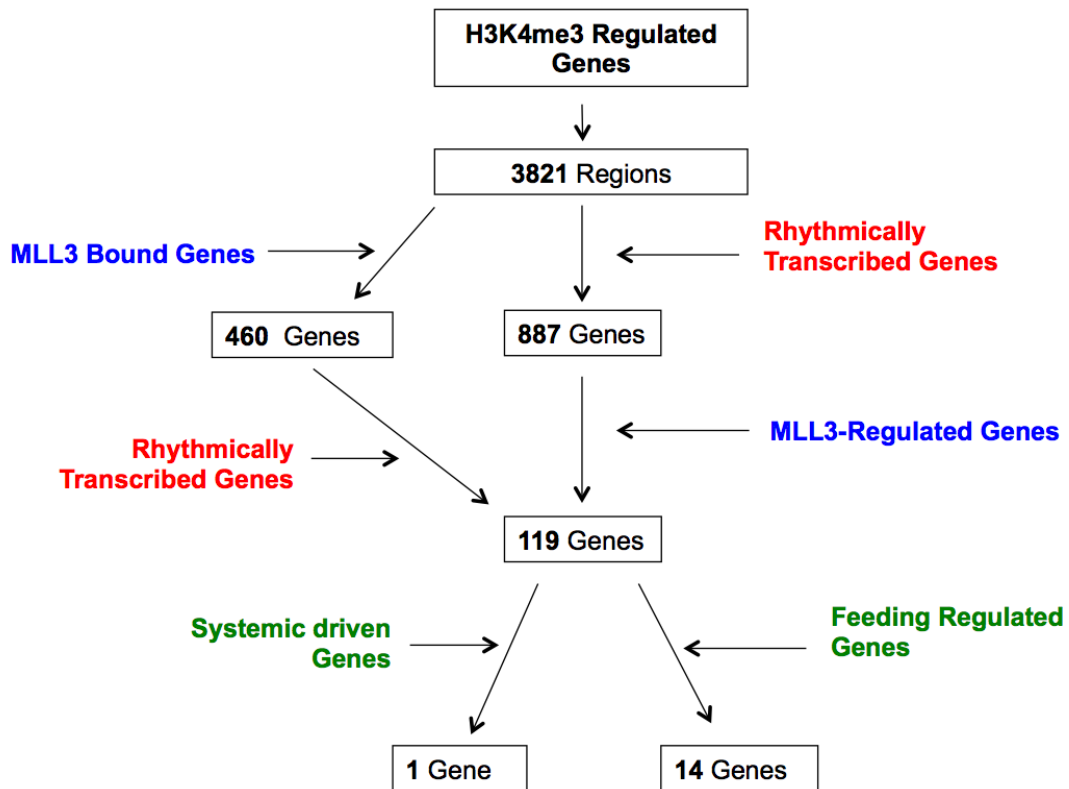

**Supplementary Figure S3** Categorisation of H3K4me3 binding sites in relation to MLL3 binding sites across the genome. The flow chart shows a series of filtering steps to focus on MLL3-regulated, rhythmic transcripts. Cross-correlation with systemic-driven (5, 14) and feeding-regulated genes (8, 15) are shown (see main text for further details).

### H3K4me3 Modification Summary in Percentages

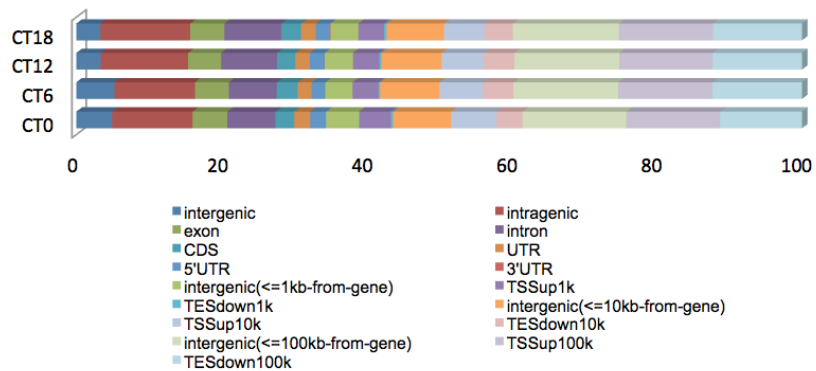

### MLL3 Binding Summary in Percentages

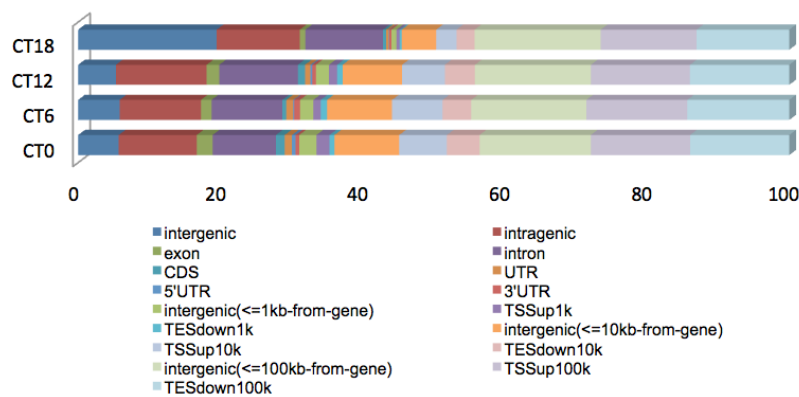

**Supplementary Figure S4 Genomic distribution of H3K4me3 and MLL3 binding sites.** Localization of binding sites relative to the annotated gene is shown. CT, Circadian Time (animals maintained in constant darkness, with subjective dawn represented by CT0, and dusk represented by CT12). Data are presented as percentages of all binding sites for H3K4me3 or MLL3 at each time-point.



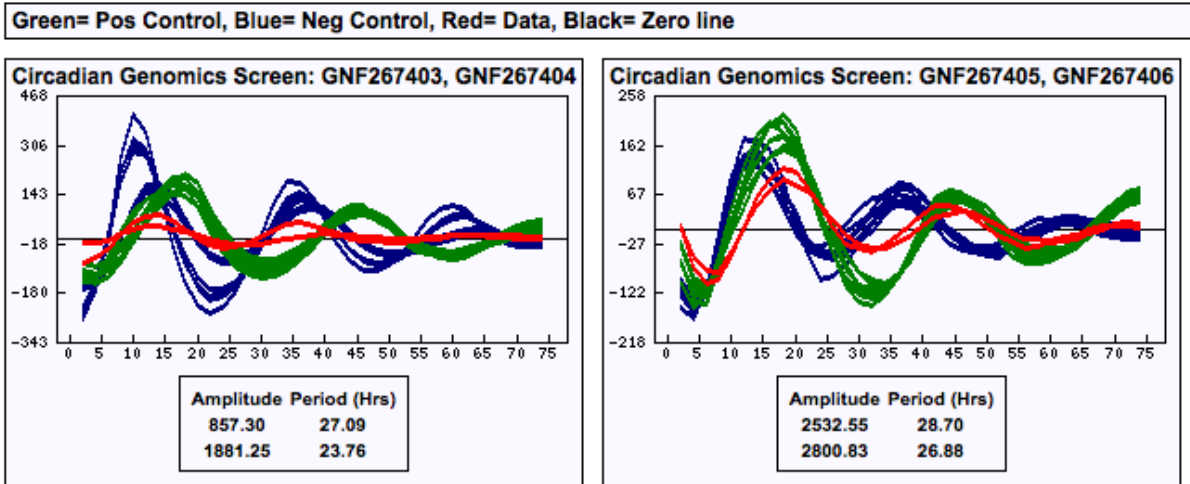

**Supplementary Figure S6 Knockdown of MLL3 affects the transcriptional clockwork in a human cell line.** Circadian rhythms of *Bmal1::luciferase* reporter expression in human U2OS cells are affected by siRNAs specifically directed against *MLL3* (red line). Data were obtained from BioGPS, <http://biogps.org/> (1, 13). Data for a negative control (scrambled siRNA, blue line) and a positive control (*mCry2* siRNA, green line) are also shown for comparison. Circadian parameters are shown below each profile.

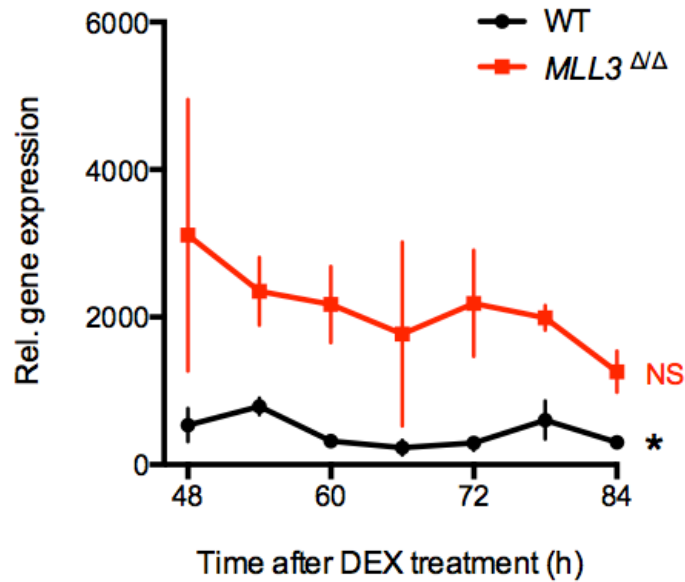

**Supplementary Figure S7 Gene expression of *MLL3* in mouse embryonic fibroblasts (MEFs).** Following synchronisation with dexamethasone (DEX), wild type (WT) or methyltransferase-deficient (*MLL3*<sup>ΔΔ</sup>) MEFs were harvested and assayed by quantitative real-time PCR using primers specific for mature *MLL3* mRNA. Data are mean ± s.e.m. for three biological replicates per time-point. Two-way ANOVA revealed a significant genotype effect ( $P < 0.001$ ). For each respective genotype, there was a clear time effect for wild type (WT) MEFs ( $P < 0.05$ ), which was not seen in *MLL3*<sup>ΔΔ</sup> MEFs (NS = not significant) when assessed by one-way ANOVA.

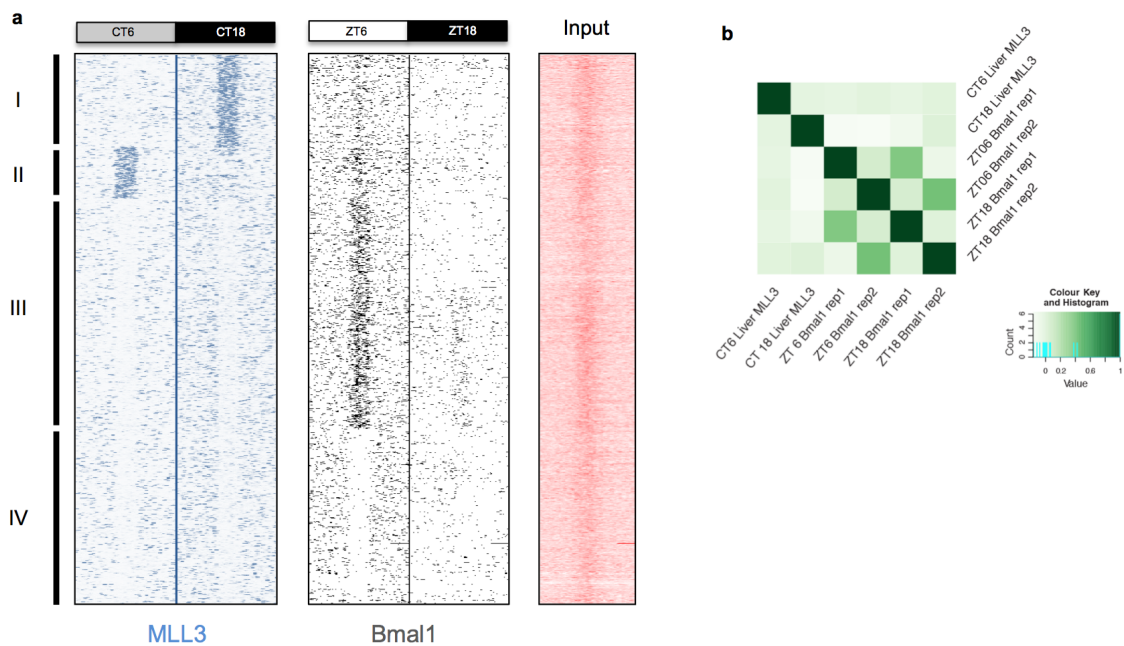

**Supplementary Figure S8 Bmal1 and MLL3 binding at transcription start sites do not correlate well.** **a**, Heat maps showing MLL3 and Bmal1 binding signal at hundreds of promoter regions, from  $-5$  kb to  $+5$  kb surrounding the centre of transcription start sites of genes. Each line represents the same genomic locus. CT, Circadian Time (animals maintained in constant darkness, with subjective dawn represented by CT0, and dusk represented by CT12). For CT samples, animals were kept in constant darkness; light grey bars indicate subjective daytime and black bars signify subjective night. ZT, Zeitgeber Time (animals maintained in 12h:12h light:dark cycles, with lights on represented by ZT0, and lights off by ZT12). For ZT samples, white bars indicate daytime (animals were in the light); black bars signify night (animals were in darkness). The Input (non-enriched) DNA signal is shown for comparison. Cluster I: MLL3 binding enriched at CT18; Cluster II: MLL3 binding sites enriched at CT6; Cluster III: Bmal1 binding enriched at ZT6; Cluster IV: No MLL3 or Bmal1 binding (negative control regions). **b**, Heat map representing clustering of MLL3 binding events compared to those of Bmal1. For each of the differentially bound sites, the RPKM-fold (RPKM of ChIP divided by RPKM of control) was calculated for each sample, and a Pearson correlation value for each sample pair computed using DiffBind (4, 16). The Heat map shows the correlation scores. RPKM, Reads Per Kilobase per Million mapped reads. Bmal1 binding signals were re-analyzed using data from Rey et al. 2011 (7, 11).



## Supplementary Table Legends

### Supplementary Table S1

Annotated list of  $n=887$  genomic loci that exhibit circadian variation in H3K4me3 binding and also generate rhythmic transcripts in mouse liver.

### Supplementary Table S2

Circwave Batch v3.3 harmonic regression analysis of microarray gene expression profiling data for  $n=3$  biological replicates over the circadian cycle. We transcriptionally profiled the  $n=887$  genomic loci that exhibit circadian variation in H3K4me3 binding and also generate rhythmic transcripts (see Supplementary Table S1) using a different microarray platform (Affymetrix Mouse Gene 1.0 ST Array) to that initially used to characterise these genes' circadian profiles (Affymetrix Mouse Genome 430 2.0 Array).

### Supplementary Table S3

Annotated list of  $n=460$  genomic loci that exhibit circadian variation in H3K4me3 and MLL3 binding, and also generate rhythmic transcripts in mouse liver.

### Supplementary Table S4

Annotated list of  $n=119$  genomic loci that exhibit circadian variation in H3K4me3 binding, are regulated by MLL3 methyltransferase activity, and also generate rhythmic transcripts in mouse liver.

### Supplementary Table S5

Functional analysis of MLL3-regulated circadian loci (see Supplementary Table S4 for list). Genes are listed by functional category or by the relevant pathway that they fall into. Analysis was performed using DAVID (2, 7, 17).

### Supplementary Table S6

List of genes driven by systemic cues, derived from Kornmann et al. 2007 (5, 11, 14). Gaps in the table arise because the genes listed are not annotated in the latest mouse genome annotation used to map their loci (mouse genome version NCBI37/mm9, July 2007). MLL3-regulated genes are highlighted in bold red lettering.

### Supplementary Table S7

List of genes driven by feeding cues, derived from Vollmers et al. 2009 (8, 12, 15). Gaps in the table arise because the genes listed are not annotated in the latest mouse genome annotation used to map their loci (mouse genome version NCBI37/mm9, July 2007). MLL3-regulated genes are highlighted in bold red lettering.

## Supplementary References

1. Jiang H, Wang F, Dyer NP, Wong WH CisGenome Browser: a flexible tool for genomic data visualization. *Bioinformatics* 26:1781–1782.
2. Kozarewa I, Turner DJ (2011) 96-plex molecular barcoding for the Illumina Genome Analyzer. *Methods Mol Biol* 733:279–298.
3. Fustin JM, O'Neill JS, Hastings MH, Hazlerigg DG, Dardente H (2009) Cry1 circadian phase in vitro: wrapped up with an E-box. *J Biol Rhythms* 24:16–24.
4. Reddy AB et al. (2007) Glucocorticoid signaling synchronizes the liver circadian transcriptome. *Hepatology* 45:1478–1488.
5. Langmead B, Trapnell C, Pop M, Salzberg SL (2009) Ultrafast and memory-efficient alignment of short DNA sequences to the human genome. *Genome Biol* 10:R25.
6. van den Ent F, Löwe J (2006) RF cloning: a restriction-free method for inserting target genes into plasmids. *J Biochem Biophys Methods* 67:67–74.
7. Hughes ME et al. (2009) Harmonics of circadian gene transcription in mammals. *PLoS Genet* 5:e1000442.
8. Ji H et al. (2008) An integrated software system for analyzing ChIP-chip and ChIP-seq data. *Nature Biotechnology* 26:1293–1300.
9. Hastings MH, Reddy AB, McMahon DG, Maywood ES (2005) Analysis of circadian mechanisms in the suprachiasmatic nucleus by transgenesis and biolistic transfection. *Meth Enzymol* 393:579–592.
10. Katada S, Sassone-Corsi P (2010) The histone methyltransferase MLL1 permits the oscillation of circadian gene expression. *Nature Publishing Group* 17:1414–1421.
11. Rey G et al. (2011) Genome-wide and phase-specific DNA-binding rhythms of BMAL1 control circadian output functions in mouse liver. *PLoS Biol* 9:e1000595.
12. Ueda HR et al. (2002) A transcription factor response element for gene expression during circadian night. *Nature* 418:534–539.
13. Zhang EE et al. (2009) A genome-wide RNAi screen for modifiers of the circadian clock in human cells. *Cell* 139:199–210.
14. Kornmann B, Schaad O, Bujard H, Takahashi JS, Schibler U (2007) System-driven and oscillator-dependent circadian transcription in mice with a conditionally active liver clock. *PLoS Biol* 5:e34.
15. Vollmers C et al. (2009) Time of feeding and the intrinsic circadian clock drive rhythms in hepatic gene expression. *Proceedings of the National Academy of Sciences* 106:21453–21458.
16. Ross-Innes CS et al. (2012) Differential oestrogen receptor binding is associated with clinical outcome in breast cancer. *Nature*:1–6.
17. Huang DW, Sherman BT, Lempicki RA (2008) Systematic and integrative analysis of large gene lists using DAVID bioinformatics resources. *Nat Protoc* 4:44–57.

Table S1

| Gene Symbol        | RefSeq ID    | Chromosome | Start Position | End Position | Strand | Genbank ID | Gene Description                                                                                                                         |
|--------------------|--------------|------------|----------------|--------------|--------|------------|------------------------------------------------------------------------------------------------------------------------------------------|
| 1001001001R1Rk     | NM_027855    | chr5       | 3155044        | 3155096      | +      | AB090618   | RIKEN cDNA 0810007C21 gene                                                                                                               |
| 2051001001005Rk    | NM_027850    | chr11      | 2244095        | 2253321      | +      | BC078676   | RIKEN cDNA 0810010F05 gene                                                                                                               |
| 3061003807Rk       | NM_025333    | chr19      | 10576130       | 10599899     | +      | BC085277   | RIKEN cDNA 0810038F07 gene                                                                                                               |
| 40910001100Rk      | NM_00108111  | chr5       | 13869699       | 13870612     | +      | BC056178   | RIKEN cDNA 09100110L9 gene                                                                                                               |
| 5111000614Rk       | NM_017447    | chr1       | 32252517       | 32273404     | +      | BC024815B  | RIKEN cDNA 1110009F14 gene                                                                                                               |
| 6111000151Rk       | NM_197979    | chr11      | 46019711       | 46043347     | +      | BC083574   | RIKEN cDNA 1110022P15 gene                                                                                                               |
| 7111003405Rk       | NR_004860    | chr1       | 57445088       | 57483529     | +      | BC058690   | RIKEN cDNA 1110034B05 gene                                                                                                               |
| 8111003807Rk       | NM_025333    | chr19      | 10576130       | 10599899     | +      | BC024815B  | RIKEN cDNA 1110038F17 gene                                                                                                               |
| 9100032207Rk       | NM_017447    | chr1       | 32252517       | 32273404     | +      | BC027512B  | RIKEN cDNA 1000220F01 gene                                                                                                               |
| 101600014C10Rk     | NM_00108533  | chr7       | 39866305       | 39882301     | +      | BC085468   | RIKEN cDNA 1800014C10 gene                                                                                                               |
| 111700017805Rk     | NM_028820    | chr9       | 57100129       | 57110408     | +      |            |                                                                                                                                          |
| 121700023802Rk     | NM_025854    | chr2       | 73121929       | 73106224     | +      | BC099444   | RIKEN cDNA 1700023802 gene   trans-acting transcription factor 9                                                                         |
| 131700133020Rk     | NM_00108111  | chr5       | 13869699       | 13870612     | +      | BC028833   | RIKEN cDNA 1700133020 gene                                                                                                               |
| 141810013L24Rk     | NM_028820    | chr9       | 57100129       | 57110408     | +      | BC116778B  | RIKEN cDNA 1810013L24 gene                                                                                                               |
| 151810063805Rk     | NM_128946415 | chr8       | 128946415      | 128949334    | +      | BC038634B  | RIKEN cDNA 1810063805 gene                                                                                                               |
| 162010209012Rk     | NM_133913    | chr5       | 24092559       | 24098305     | +      | AK122504   | RIKEN cDNA 2010209012 gene                                                                                                               |
| 172010358419Rk     | NM_027250    | chr7       | 10600757       | 10601323     | +      | BC012191   | RIKEN cDNA 2010358419 gene                                                                                                               |
| 182310018E02Rk     | NM_024460    | chr5       | 31208258       | 31210098     | +      | BC002177   | RIKEN cDNA 2310018E02 gene                                                                                                               |
| 192310058C23Rk     | NM_173187N   | chr1       | 107560490      | 10765189     | +      | BC117949   | RIKEN cDNA 2310058C23 gene                                                                                                               |
| 20231003724Rk      | chr15        |            | 98349239       | 98364669     | +      | BC125631B  | RIKEN cDNA 231003724 gene                                                                                                                |
| 212310047013Rk     | NM_024186    | chr2       | 12268891       | 12341097     | +      | BC027202   | RIKEN cDNA 2310047013 gene                                                                                                               |
| 222410002224Rk     | NM_025879    | chr13      | 10493234       | 10498519     | +      | BC021758   | RIKEN cDNA 2410002224 gene   hypothetical protein LOC100040518   hypothetical protein LOC1000444                                         |
| 232510002224Rk     | NM_00103316  | chr16      | 18836684       | 18840306     | +      |            | RIKEN cDNA 2510002224 gene                                                                                                               |
| 242610110110Rk     | NM_0011149   | chr9       | 95390621       | 95412415     | +      | BC088265   | RIKEN cDNA 2610110110 gene                                                                                                               |
| 252610507611Rk     | NM_00108111  | chr5       | 13869699       | 13870612     | +      | BC075833   | RIKEN cDNA 2610507611 gene                                                                                                               |
| 262700038C09Rk     | NM_025998    | chr2       | 180292210      | 180292209    | +      | BC058518   | RIKEN cDNA 2700038C09 gene                                                                                                               |
| 27483348J09Rk      | NM_00102460  | chr8       | 107115368      | 107120766    | +      | BC094946   | RIKEN cDNA 483348J09 gene                                                                                                                |
| 284833439L19Rk     | chr13        |            | 54652584       | 54668722     | +      | BC033445   | RIKEN cDNA 4833439L19 gene                                                                                                               |
| 294833439C05Rk     | NM_153794    | chr13      | 68458874       | 68458874     | +      | BC038965   | RIKEN cDNA 4833439C05 gene                                                                                                               |
| 304933407H18Rk     | NM_00108111  | chr5       | 13869699       | 13870612     | +      |            | RIKEN cDNA 4933407H18 gene                                                                                                               |
| 315430407P10Rk     | NM_144883    | chr2       | 6018553        | 6051192      | +      | BC025867   | RIKEN cDNA 5430407P10 gene                                                                                                               |
| 326354699A04Rk     | NM_0011149   | chr9       | 95390621       | 95412415     | +      | BC030715   | RIKEN cDNA 6330499A04 gene                                                                                                               |
| 338030512M13Rk     | NM_172458    | chr17      | 32038181       | 32043517     | +      |            | RIKEN cDNA 8030512M13 gene                                                                                                               |
| 349130011J15Rk     | NM_172396    | chr8       | 75080097       | 75090448     | +      | BC055692   | RIKEN cDNA 9130011J15 gene                                                                                                               |
| 359530058B02Rk     | chr17        |            | 26006943       | 26005683     | +      | BC024332   | RIKEN cDNA 9530058B02 gene                                                                                                               |
| 36953006507Rk      | NM_153171    | chr11      | 42209950       | 42222222     | +      | BC034829   | RIKEN cDNA 953006507 gene                                                                                                                |
| 37A23006721Rk      | NM_00103332  | chr2       | 14636812       | 14633742     | +      | BC033394   | RIKEN cDNA A23006721 gene                                                                                                                |
| 38A43000514Rk      | chr4         |            | 15331346       | 153336023    | +      | BC052148   | RIKEN cDNA A43000514 gene                                                                                                                |
| 39A530082C11Rk     | NM_177186    | chr4       | 15497525       | 154997449    | +      | BC058728   | RIKEN cDNA A530082C11 gene                                                                                                               |
| 40Abn1             | NM_172961    | chr16      | 85183562       | 85186111     | +      | BC055879   | N-aminobutyrate aminotransferase                                                                                                         |
| 41Abca1            | NM_013751    | chr8       | 82207241       | 82233422     | +      | BC052422   | ATP-binding cassette, sub-family E (ABAP), member 1                                                                                      |
| 42Abhd13           | NM_00108111  | chr5       | 13869699       | 13870612     | +      | BC043960   | aldehyde dehydrogenase domain containing 13                                                                                              |
| 43Abhd9            | NM_025341    | chr14      | 8835416        | 8889069      | +      | BC020711   | aldehyde dehydrogenase domain containing 6                                                                                               |
| 44Abn1             | NM_00107170  | chr8       | 22805708       | 22805708     | +      | AF430251   | abn-interactor 1                                                                                                                         |
| 45Abp1             | NM_030251    | chr6       | 8975910        | 89791894     | +      | AB033477   | ankyrin repeat and BTB (POZ) domain containing 1                                                                                         |
| 46Abpb2            | NM_178890    | chr2       | 103406467      | 103558580    | +      | BC054399   | ankyrin repeat and BTB (POZ) domain containing 2                                                                                         |
| 47Acaab8           | NM_025862    | chr9       | 26781720       | 26807131     | +      | BC037844   | acyl-Coenzyme A dehydrogenase family, member 8                                                                                           |
| 48Acb7             | NM_134037    | chr10      | 10036370       | 10036370     | +      | BC065378   | ATP citrate lyase                                                                                                                        |
| 49Acb9             | NM_00107777  | chr6       | 69050111       | 6991770      | +      | BC118927   | ACN9 homolog (S. cerevisiae)                                                                                                             |
| 50Acsa2            | NM_019811    | chr2       | 155342695      | 155411460    | +      | BC051432   | acyl-CoA synthetase short-chain family member 2                                                                                          |
| 51Actn1            | NM_134166    | chr12      | 81268532       | 81361303     | +      | BC054530   | actinin, alpha 1                                                                                                                         |
| 52Actrb            | NM_007395    | chr15      | 101043568      | 101043568    | +      | BC069632   | actinin A receptor, type 1B                                                                                                              |
| 53Adg1             | NM_00102446  | chr5       | 34916461       | 34974957     | +      | AF096830   | aducanin (alpha)                                                                                                                         |
| 54Adfp             | NM_007408    | chr4       | 86302469       | 86315963     | +      | BN9375     | adipose differentiation related protein                                                                                                  |
| 55Adss             | NM_007422    | chr1       | 17989309       | 17972640     | +      | L2454      | adenylsuccinate synthetase, non muscle                                                                                                   |
| 56Adb              | NM_134111    | chr11      | 20385891       | 20411600     | +      | BC025036   | adipophilin                                                                                                                              |
| 57Agl              | NM_00108133  | chr3       | 116445969      | 116510327    | +      | BC044780   | amlyc-1,6-glucosidase, 4-alpha-glucanotransferase                                                                                        |
| 58Aga6p            | NM_018743    | chr8       | 24283418       | 24318818     | +      | BC031767   | 1-acylglycerol-3-phosphate O-acyltransferase 6 (lysophosphatidic acid acyltransferase, zeta)                                             |
| 59Aghy             | NM_018661    | chr2       | 15488546       | 154900169    | +      | BC086781   | S-adenosylhomocysteine hydrolase                                                                                                         |
| 60Aha1             | NM_146036    | chr12      | 86487658       | 86487658     | +      | AF431451   | AHA1, activator of heat shock protein ATPase homolog 1 (yeast)                                                                           |
| 61A1597468         | chr10        |            | 84565488       | 84583363     | +      | BC086492   |                                                                                                                                          |
| 62Afm2             | NM_00103910  | chr10      | 61176036       | 61202008     | +      | BC038129   | apoptosis-inducing factor, mitochondrion-associated 2                                                                                    |
| 63AK2              | NM_018695    | chr4       | 12867059       | 12868956     | +      | BC008810   | adenylyl kinase 2                                                                                                                        |
| 64A3               | NM_021299    | chr12      | 29129522       | 29129522     | +      | BC055819   | adenylyl kinase 3                                                                                                                        |
| 65Akap9            | NM_184462    | chr5       | 3928178        | 4082024      | +      |            | A kinase (PRKA) anchor protein (yotiao) 9                                                                                                |
| 66Alas1            | NM_020599    | chr9       | 106136258      | 106150187    | +      | BC022110   | aminolevulinic acid synthase 1                                                                                                           |
| 67Alcm             | NM_006565    | chr16      | 52251003       | 52251003     | +      | BC027280   | activated leukocyte cell adhesion molecule                                                                                               |
| 68Alcl1            | NM_027406    | chr6       | 30508122       | 30549165     | +      | BC031722   | aldehyde dehydrogenase 1 family, member L1                                                                                               |
| 69Alcb             | NM_144903    | chr4       | 49548867       | 49562361     | +      | BC036132   | aldolase 2, B isoform                                                                                                                    |
| 70Amd1 Amd2 Amd3   | NM_009656    | chr10      | 40009869       | 40021922     | +      | BC092072   | S-adenosylmethionine decarboxylase 1   S-adenosylmethionine decarboxylase 2   S-adenosylmethionine decarboxylase 3 (Drosophila)          |
| 71Amd2             | NM_009656    | chr10      | 160750242      | 162775372    | +      | BC024607   | angel homolog 2 (Drosophila)                                                                                                             |
| 72Ankhd1 Elk4ebp3  | NM_175375    | chr18      | 36753793       | 36753793     | +      | AK123284   | ankyrin repeat and KH domain containing 1   eukaryotic translation initiation factor 4E binding protein 3                                |
| 73Ankrd17          | NM_030886    | chr5       | 90856191       | 90795590     | +      | AF130371   | ankyrin repeat domain 17                                                                                                                 |
| 74Ankr50           | NM_179270    | chr5       | 93470197       | 93473977     | +      |            | ankyrin repeat domain 50                                                                                                                 |
| 75Ankr7            | NM_006137    | chr1       | 75169179       | 75169179     | +      | BC071240   | ankyrin repeat and zinc finger domain containing 1                                                                                       |
| 76Anks2a           | NM_005672    | chr9       | 62189235       | 62228055     | +      | BC062899   | anuclear (leucine-rich) nuclear phosphoprotein 32 family, member A                                                                       |
| 77Anxa5            | NM_009673    | chr3       | 36347845       | 36374260     | +      | U29396     | annexin A5                                                                                                                               |
| 78Anxa7            | NM_009674    | chr14      | 21274499       | 21299162     | +      | L13129     | annexin A7                                                                                                                               |
| 79Aph1             | NM_018699    | chr14      | 215450423      | 215450423    | +      | BC013067   | animator-related protein complex 3, mu 1 subunit                                                                                         |
| 80Aph1a LOC100039  | NM_146104    | chr3       | 95697919       | 95702226     | +      | BC012406   | anterior pharynx defective 1a homolog (C. elegans)   similar to Aph1a protein                                                            |
| 81Aqp11            | NM_175105    | chr7       | 104874889      | 104886757    | +      | AB021848   | aquaporin 11                                                                                                                             |
| 82Arfap1           | NM_145780    | chr2       | 18071970       | 180717165    | +      | BC052922   | ADP-ribosylation factor GTPase activating protein 1                                                                                      |
| 83Arpapp12         | NM_00103680  | chr16      | 61344466       | 61344466     | +      | BC024633   | rho GTPase activating protein 12                                                                                                         |
| 84Art1             | NM_025859    | chr10      | 88194111       | 88206839     | +      | BC098684   | ADP-ribosylation factor-like 1                                                                                                           |
| 85Arbip4           | NM_144509    | chr5       | 124565815      | 124568205    | +      | BC035283   | ADP-ribosylation factor-like 6 interacting protein 4                                                                                     |
| 86Armc1            | NM_028440    | chr3       | 19032144       | 19063065     | +      | BC021451   | armadillo repeat containing 1                                                                                                            |
| 87Armc3            | NM_00103263  | chr13      | 81384844       | 81384844     | +      |            | arrestin domain containing 3                                                                                                             |
| 88Aai              | NM_133768    | chr5       | 130487134      | 130500215    | +      | BC018670   | argininosuccinate lyase                                                                                                                  |
| 89AIF2 LOC10004798 | NM_00102505  | chr2       | 73654566       | 73730685     | +      | BC079883   | activating transcription factor 2   similar to Cyclic AMP-dependent transcription factor ATF-2 (Activating transcription factor 2)       |
| 90AIP              | NM_009716    | chr15      | 80085614       | 80087971     | +      | BC085169   | activating transcription factor 4                                                                                                        |
| 91Aip3 D930048N14  | CCNA4        | chr16      | 451888242      | 451888242    | +      | BC010899   | actin cytochrome-related protein 3 (yeast)   RIKEN cDNA D930048N14 gene                                                                  |
| 92Atp1a1           | NM_144900    | chr3       | 101380146      | 101408607    | +      | BC024435   | ATPase, Na+/K+ transporting, alpha 1 polypeptide                                                                                         |
| 93Atp5h1 LOC100039 | NM_027862    | chr11      | 115277011      | 115281233    | +      | BC081431   | ATP synthase, H+ transporting, mitochondrial F0 complex, subunit d   ATP synthase, H+ transporting, mitochondrial F0 complex, subunit d1 |
| 94Atp5vb           | NM_033617    | chr12      | 117559931      | 117559934    | +      | BC033393   | ATPase, H+ transporting, lysosomal V0 subunit B                                                                                          |
| 95Atp5c1           | NM_025404    | chr15      | 39591898       | 39621053     | +      | BC058672   | ATPase, H+ transporting, lysosomal V1 subunit C1                                                                                         |
| 96Atp5v1           | NM_023721    | chr12      | 79943969       | 79962625     | +      | BC033457   | ATPase, H+ transporting, lysosomal V1 subunit D1                                                                                         |
| 97Atp5v1e          | NM_027110    | chr6       | 120745262      | 120772719    | +      | BC003421   | ATPase, H+ transporting, lysosomal V1 subunit E                                                                                          |
| 98Atp5v1f          | NM_179267    | chr7       | 133552222      | 133552222    | +      | BC054843   | ATPase, H+ transporting, lysosomal V1 subunit F                                                                                          |
| 99B3galm2          | NM_178640    | chr13      | 14048041       | 14091353     | +      | BC058510   | UDP-GalNAc:beta-GlcNAc beta 1-3-galactosyltransferase, polypeptide 2                                                                     |
| 100Baq4            | NM_026121    | chr8       | 26875008       | 26895681     | +      | AF332863   | BCL2-associated atlanogene 4                                                                                                             |
| 101Baqa2           | NM_133082    | chr11      | 119604406      | 119688144    | +      | BC006620   | brain-specific angiogenesis inhibitor 1-associated protein 2                                                                             |
| 102Beata           | NM_019635    | chr17      | 355791759      | 35582628     | +      | BC024659   | HLA-B-associated transcript 1A                                                                                                           |
| 103BC013529        | NM_145418    | chr10      | 7487745        | 7500715      | +      | BC013529   |                                                                                                                                          |
| 104BC016495        | NM_145497    | chr19      | 18706506       | 18726681     | +      | BC016495   |                                                                                                                                          |
| 105BC048355        | NM_207181    | chr17      | 46633717       | 46639667     | +      | BC048355   |                                                                                                                                          |
| 106Becl1           | NM_009656    | chr10      | 114242474      | 114251792    | +      | BC057578   | breast cancer anti-estrogen resistance 1                                                                                                 |
| 107Becl1           | NM_019584    | chr11      | 101147266      | 101165581    | +      | BC057170   | beclin 1, autophagy related                                                                                                              |
| 108Bel1            | NM_009748    | chr6       | 4028904        | 4036927      | +      | BC005572   | blocked early in transport 1 homolog (S. cerevisiae)                                                                                     |
| 109Bicap           | NM_018916    | chr2       | 157382098      | 157392097    | +      | BC083339   | bladder cancer associated protein homolog (human)                                                                                        |
| 110Birc2           | NM_144823    | chr7       | 28232997       | 28251494     | +      | BC028677   | biliverdin reductase B (flavin reductase (NADPH))                                                                                        |
| 111Bmf             | NM_138313    | chr2       | 118354493      |              |        |            |                                                                                                                                          |

|     |                 |             |       |           |           |           |                                                                                                         |
|-----|-----------------|-------------|-------|-----------|-----------|-----------|---------------------------------------------------------------------------------------------------------|
| 164 | Cn8b            | NM_012000   | chr8  | 14888536  | 14901720  | BC021625  | ceroid-lipofuscinosis, neuronal 8                                                                       |
| 165 | Cp2x            | NM_011868   | chr9  | 44025555  | 44045718  | AF134683  | caseinolytic peptidase X (E co)                                                                         |
| 166 | Ct4b            | NM_001093   | chr4  | 86508153  | 86509994  | UJ1844    | clathrin, light polypeptide (Lc)                                                                        |
| 167 | Ct6c            | NM_0010039  | chr11 | 86508153  | 86509994  | BC079897  | clathrin, heavy polypeptide (Hc)                                                                        |
| 168 | Cmrm6           | NM_026336   | chr9  | 114640320 | 114658462 | AY241868  | CKLF-like MARVEL transmembrane domain containing 6                                                      |
| 169 | Cmrm8           | NM_027252   | chr9  | 114732370 | 114732370 | AY243534  | CKLF-like MARVEL transmembrane domain containing 8                                                      |
| 170 | Cm3             | NM_026444   | chr3  | 121129458 | 121181123 | BC035571  | clabronin 3, acidic                                                                                     |
| 171 | Cn04t           | NM_016877   | chr6  | 34972065  | 35083715  | BC058778  | CCRA-NOT transcription complex, subunit 4                                                               |
| 172 | Cob1            | NM_177025   | chr2  | 64926408  | 65077460  | AY308746  | Cob-like 1                                                                                              |
| 173 | Col1a1          | NM_000259   | chr10 | 76514424  | 76514424  | BC068417  | collagen, type XVIII, alpha 1                                                                           |
| 174 | Comm7f          | NM_133550   | chr2  | 153442669 | 153458475 | BC032215  | CDMM domain containing 7                                                                                |
| 175 | Cp              | NM_0010426  | chr3  | 19857054  | 19808792  | BC062957  | ceruloplasmin                                                                                           |
| 176 | Cpnb2           | NM_179537   | chr5  | 43625198  | 43677420  | BC107349  | cytoplasmic polyadenylation element binding protein 2                                                   |
| 177 | Cpnb3           | NM_020519   | chr5  | 37036511  | 37174796  | AB033274  | cytoplasmic polyadenylation element binding protein 3                                                   |
| 178 | Cpbf3           | NM_018813   | chr12 | 21292260  | 21320695  | BC023297  | cleavage and polyadenylation specificity factor 3                                                       |
| 179 | Cpl1a           | NM_013495   | chr19 | 3323320   | 3385733   | BC046383  | camiline palmitoyltransferase 1a, liver                                                                 |
| 180 | Cresbp          | NM_0010254  | chr16 | 40944048  | 4213404   | AF408398  | CREB binding protein                                                                                    |
| 181 | Cresfz          | NM_145161   | chr5  | 97591536  | 97593265  | BC069666  | CREB1/ATF-2/ZIP transcription factor                                                                    |
| 182 | Crem            | NM_0011088  | chr18 | 3266354   | 3327525   | AF138721  | CAMP responsive element modulator                                                                       |
| 183 | Crip2           | NM_024223   | chr12 | 114378742 | 114383717 | BC002096  | cysteine rich protein 2                                                                                 |
| 184 | Crot            | NM_023733   | chr5  | 8966038   | 8997161   | BC012308  | carfiline O-cantoinyltransferase                                                                        |
| 185 | Cs              | NM_026444   | chr3  | 127747473 | 12779535  | BC029754  | citrate synthase                                                                                        |
| 186 | Csde1           | NM_144901   | chr3  | 102624333 | 102662106 | BC062097  | cold shock domain containing E1, RNA binding                                                            |
| 187 | Csk1a1          | NM_146087   | chr18 | 61714087  | 61748428  | BC019740  | casein kinase 1, alpha 1                                                                                |
| 188 | Csk2a1          | LOC100004   | chr10 | 150505221 | 152107583 | BC060742  | casein kinase 2, alpha 1 polypeptide   similar to Casein kinase 2, alpha 1 polypeptide                  |
| 189 | Csps1           | NM_146604   | chr12 | 63037033  | 63299163  | BC074561  | CTCF family, member 5                                                                                   |
| 190 | Ctdsp1          | LOC10004    | chr1  | 74438173  | 74443859  | AY028904  | CTD (carboxy-terminal domain, RNA polymerase II, polypeptide A) small phosphatase 1   similar to goli-1 |
| 191 | Chr9            | NM_009431   | chr7  | 118172519 | 118198981 | L49502    | cytochrome P450, family 2, subfamily u, polypeptide 1                                                   |
| 192 | Csh             | NM_007801   | chr9  | 89949347  | 89971027  | U06119    | calpain H                                                                                               |
| 193 | Csh             | NM_006813   | chr3  | 64464522  | 64471614  | BC028163  | calpain I                                                                                               |
| 194 | Ctn             | NM_007803   | chr7  | 151621629 | 151656642 | U03184    | cortactin                                                                                               |
| 195 | Cugbp1          | NM_017388   | chr2  | 9070815   | 90857212  | AF267535  | CUG triplet repeat, RNA binding protein 1                                                               |
| 196 | Cul2            | NM_017412   | chr8  | 74464263  | 74717638  | BC029280  | culmin 1                                                                                                |
| 197 | Cul2            | NM_024402   | chr18 | 3383029   | 34363272  | U06119    | culmin 2                                                                                                |
| 198 | Cxcl12          | NM_0010124  | chr6  | 117118881 | 117213445 | D43804    | chemokine (C-X-C motif) ligand 12                                                                       |
| 199 | Cxoc5           | NM_133687   | chr18 | 35898472  | 36021347  | BC089314  | CXCC finger 5                                                                                           |
| 200 | Cyca            | NM_007868   | chr6  | 50512562  | 505167034 | U06119    | cytochrome c, somatic                                                                                   |
| 201 | Cytd            | NM_173869   | chr8  | 91220974  | 91272367  | BC042438  | cytokeratin (turban tumor syndrome)                                                                     |
| 202 | Cyp2u1          | NM_009431   | chr7  | 130994057 | 131006145 | BC010973  | cytochrome P450, family 2, subfamily u, polypeptide 1                                                   |
| 203 | Cyp8b1          | NM_010012   | chr9  | 121823474 | 121825418 | BC010973  | cytochrome P450, family 8, subfamily b, polypeptide 1                                                   |
| 204 | D01ER14E01R2k   | NM_026444   | chr3  | 127747473 | 12779535  | AK173685  | RKRN cDNA DC03074601, gene                                                                              |
| 205 | D10ER122e       | NM_026855   | chr10 | 94943400  | 94964551  | BC024337  | DNA segment, Chr 10, ERATO Dc 322, expressed                                                            |
| 206 | D10ER1641e      | NM_026514   | chr10 | 59450657  | 59465880  | BC025117  | DNA segment, Chr 10, ERATO Dc 641, expressed                                                            |
| 207 | D10JH81E10C10NM | 138501      | chr10 | 77624812  | 77632513  | BC013475  | DNA segment, Chr 10, Johns Hopkins University 81 expressed   similar to es1 protein                     |
| 208 | D10JH81E10C10NM | 138510      | chr10 | 82322983  | 82331580  | BC013475  | DNA segment, Chr 10, Wayne State University 102, expressed                                              |
| 209 | D10ER1621e      | NM_026514   | chr10 | 59247037  | 59282295  | BC070426D | DNA segment, Chr 15, ERATO Dc 621, expressed                                                            |
| 210 | D10ER1642e      | NM_026567   | chr16 | 78543775  | 78578992  | BC019957  | DNA segment, Chr 16, ERATO Dc 472, expressed                                                            |
| 211 | D17Wsu104e      | NM_080837   | chr17 | 56315964  | 56323343  | AY038184  | DNA segment, Chr 17, Wayne State University 104, expressed                                              |
| 212 | Dazap1          | NM_017892   | chr8  | 86239998  | 86247247  | BC020134  | DEAD (Asp-Glu-Ala-Asp) box polypeptide 39                                                               |
| 213 | D4ER122e        | NM_010256   | chr4  | 140689826 | 140695711 | BC066992  | DNA segment, Chr 4, ERATO Dc 22, expressed                                                              |
| 214 | Dad1            | LOC100044   | chr14 | 54855160  | 54873580  | BC028174  | defender against cell death 1   hypothetical protein LOC100044173                                       |
| 215 | Dax             | NM_007829   | chr17 | 34046443  | 34052313  | BC128733  | Fas death domain-associated protein                                                                     |
| 216 | Dasap1          | NM_133180   | chr10 | 79767219  | 79767219  | BC024355  | DAZ associated protein 1                                                                                |
| 217 | Dasap2          | NM_011873   | chr15 | 100446072 | 100451192 | AF085348  | DAZ associated protein 2                                                                                |
| 218 | Dbbp            | NM_016974   | chr7  | 52860602  | 52865821  | BC018323  | D beta albumin promoter binding protein                                                                 |
| 219 | Dc1n2           | NM_027151   | chr10 | 12670345  | 126718963 | BC004613  | dynamid 2                                                                                               |
| 220 | Dc1n4           | NM_008302   | chr18 | 63885876  | 60718425  | U06119    | dynamid 4                                                                                               |
| 221 | Dc1n5           | NM_021608   | chr7  | 129276568 | 129292558 | BC010834  | dynamid 5                                                                                               |
| 222 | Dcun1e2         | NM_0010245  | chr8  | 13255963  | 13288126  | BC108346  | DCN1, defective in cullin neddylation 1, domain containing 2 (S. cerevisiae)                            |
| 223 | Dcun1e4         | NM_178896   | chr5  | 73972294  | 73952020  | BC108346  | DCN1, defective in cullin neddylation 1, domain containing 4 (S. cerevisiae)                            |
| 224 | Dd1             | NM_010816   | chr12 | 21276102  | 21276102  | BC029666  | development and differentiation enhancing factor 2                                                      |
| 225 | Dd4             | NM_029083   | chr10 | 59412423  | 59414518  | BC132645  | DNA-damage-inducible transcript 4                                                                       |
| 226 | Ddx17           | NM_199090   | chr15 | 79358126  | 79377171  | BC096036  | DEAD (Asp-Glu-Ala-Asp) box polypeptide 17                                                               |
| 227 | Ddx39           | NM_197832   | chr8  | 86239998  | 86247247  | BC020134  | DEAD (Asp-Glu-Ala-Asp) box polypeptide 39                                                               |
| 228 | Ddx42           | NM_010783   | chr40 | 106107340 | 106107340 | BC043136  | DEAD (Asp-Glu-Ala-Asp) box polypeptide 42                                                               |
| 229 | Ddx46           | NM_145975   | chr13 | 53736412  | 53780492  | BC082240  | DEAD (Asp-Glu-Ala-Asp) box polypeptide 46                                                               |
| 230 | Ddx6            | NM_0011082  | chr9  | 44412984  | 44442274  | BC021452  | DEAD (Asp-Glu-Ala-Asp) box polypeptide 6                                                                |
| 231 | Ddx6            | NM_017892   | chr8  | 86239998  | 86247247  | BC021548  | differentially expressed in B16F10 1                                                                    |
| 232 | Ddxd1           | NM_011615   | chr1  | 173281384 | 173271759 | BC023568  | death effector domain-containing                                                                        |
| 233 | Ddxd3           | NM_0010379  | chr15 | 54943879  | 55085757  | BC023568  | DEP domain containing 6                                                                                 |
| 234 | Dhdh            | NM_027903   | chr7  | 52728933  | 52744166  | BC116414  | dihydrodiol dehydrogenase (dimeric)                                                                     |
| 235 | Dh1             | NM_010449   | chr13 | 93124738  | 93159208  | BC005796  | dihydrodiolate reductase                                                                                |
| 236 | Dhs3            | NM_011303   | chr4  | 144482730 | 144518112 | BC101072  | dihydrogenase reductase (SDR family) member 3                                                           |
| 237 | Dhu36           | NM_028136   | chr3  | 62274005  | 62310910  | AF448804  | DEAH (Asp-Glu-Ala-His) box polypeptide 36                                                               |
| 238 | Dhu9            | NM_007842   | chr1  | 155302943 | 155343772 | U91922    | DEAH (Asp-Glu-Ala-His) box polypeptide 9                                                                |
| 239 | Dhu14           | NM_146427   | chr40 | 53043145  | 53043145  | BC021485  | dehydrogenase S-acetyltransferase (E2 component of pyruvate dehydrogenase complex)                      |
| 240 | Dmap1           | NM_023178   | chr1  | 11737296  | 117354853 | AF43870   | DNA methyltransferase 1-associated protein 1                                                            |
| 241 | Dnaj1           | NM_008238   | chr4  | 40689566  | 40681997  | AF055664  | DnaJ (Hsp40) homolog, subfamily A, member 1                                                             |
| 242 | Dnaj2           | NM_019794   | chr8  | 88061539  | 88072243  | AB028853  | DnaJ (Hsp40) homolog, subfamily A, member 2                                                             |
| 243 | Dnaj3           | NM_019801   | chr8  | 86132902  | 86138802  | AB028272  | DnaJ (Hsp40) homolog, subfamily B, member 1                                                             |
| 244 | Dnaj5b          | NM_0010379  | chr15 | 30062480  | 30113018  | U06119    | DnaJ (Hsp40) homolog, subfamily B, member 6                                                             |
| 245 | Dnm1b3          | NM_0010039  | chr2  | 163475190 | 153556633 | AY078427  | DNA methyltransferase 3B                                                                                |
| 246 | Dock4           | NM_172803   | chr12 | 41172840  | 41573082  | U06119    | dedicator of cytokinesis 4                                                                              |
| 247 | Dp9             | NM_172624   | chr17 | 66326106  | 66336311  | BC057631  | dipeptidyl peptidase 9                                                                                  |
| 248 | Dvl1            | NM_010091   | chr4  | 155221521 | 155233412 | U10115    | dishevelled, dish homolog 1 (Drosophila)                                                                |
| 249 | Dym             | NM_027277   | chr18 | 75178420  | 75446622  | BC038276  | dymecin                                                                                                 |
| 250 | Dynl1           | NM_026556   | chr11 | 87793027  | 87801007  | BC040822  | dynamitin light chain LC8-type 2                                                                        |
| 251 | Ecc2            | NM_002490   | chr16 | 20611074  | 20611074  | BC118542  | endostatin converting enzyme 2                                                                          |
| 252 | Eedm1           | NM_138677   | chr6  | 108878646 | 108890345 | AB042828  | ER degradation enhancer, mannosidase alpha-like 1                                                       |
| 253 | Efdn2           | NM_025994   | chr4  | 141414057 | 141430867 | BC125303  | EF hand domain containing 2                                                                             |
| 254 | Efn1a           | NM_010107   | chr3  | 89078657  | 89083563  | BC002046  | efpA1                                                                                                   |
| 255 | Efn2            | NM_053078   | chr7  | 27849677  | 27851782  | AF43870   | ESC, nine homolog 2 (C. elegans)                                                                        |
| 256 | Efn1a           | NM_010120   | chr18 | 46757358  | 46799862  | AF026481  | eukaryotic translation initiation factor 1A                                                             |
| 257 | Efn1d           | NM_027236   | chr19 | 53668113  | 53715111  | BC024640  | eukaryotic translation initiation factor 1A domain containing                                           |
| 258 | Efn3            | NM_144545   | chr2  | 21688119  | 21217731  | BC080788  | eukaryotic translation initiation factor 3, subunit J                                                   |
| 259 | Efn4            | NM_049762   | chr1  | 60760761  | 60740497  | BC034049  | eukaryotic translation initiation factor 4A1                                                            |
| 260 | Efn4a2          | NM_013506   | chr16 | 23107829  | 23114020  | BC094422  | eukaryotic translation initiation factor 4A2                                                            |
| 261 | Efn4b           | NM_144523   | chr15 | 101904361 | 101927604 | BC007177  | eukaryotic translation initiation factor 4B                                                             |
| 262 | Efn4c           | NM_027917   | chr15 | 138159156 | 138223633 | BC095087  | eukaryotic translation initiation factor 4C                                                             |
| 263 | Efn4e           | NM_007918   | chr8  | 28370831  | 28387140  | U12856    | eukaryotic translation initiation factor 4E binding protein 1                                           |
| 264 | Efn4e           | NM_010124   | chr10 | 60895228  | 60915521  | BC015082  | eukaryotic translation initiation factor 4E binding protein 2                                           |
| 265 | Efn4f           | LOC10004768 | chr12 | 112776416 | 112784959 | BC039275  | eukaryotic translation initiation factor 5   similar to Eukaryotic translation initiation factor 5      |
| 266 | Efn4g           | NM_007820   | chr14 | 79501001  | 79522234  | EF0617    | E74-like factor                                                                                         |
| 267 | Elk4            | NM_007923   | chr1  | 133904453 | 133929182 | BC004798  | ELK4, member of ETS oncogene family                                                                     |
| 268 | Elov5           | NM_134255   | chr3  | 77765175  | 77823233  | BC022911  | ELOVL family member 5, elongation of long chain fatty acids (yeast)                                     |
| 269 | Elov6           | NM_130450   | chr3  | 129235304 | 129414113 | AY054543  | ELOVL family member 6, elongation of long chain fatty acids (yeast)                                     |
| 270 | Epl1            | NM_026562   | chr2  | 10540206  | 105744557 | U06119    | elongation protein 4 homolog (S. cerevisiae)                                                            |
| 271 | Epm2a1          | NM_175296   | chr9  | 111174345 | 111181593 | BC018474  | EPH2A (Efrin) interacting protein 1                                                                     |
| 272 | Erap1           | NM_030711   | chr13 | 74777321  | 74850794  | AF227511  | endoplasmic reticulum aminopeptidase 1                                                                  |
| 273 | Erbb3           | NM_010163   | chr10 | 128005702 | 128026708 | BC106091  | v-erb-B2 erythroblastic leukemia viral oncogene homolog 3 (avian)                                       |
| 274 | Erf1            | NM_010163   | chr10 | 128005702 | 128026708 | BC106091  | ETS2 repressor factor                                                                                   |
| 275 | Ergp1           | NM_026170   | chr17 | 26998457  | 26993881  | BC005516  | endoplasmic reticulum-golgi intermediate compartment (ERGIC) 1                                          |
| 276 | Erl1            | LOC10004277 | chr11 | 81735015  | 81744794  | BC083141  | enhancer of rudimentary homolog (Drosophila)   similar to human protein homologous to DROER protein     |
| 277 | Erg29           | NM_026129   | chr5  | 121894760 | 121900483 | BC011252  | endoplasmic reticulum protein 29                                                                        |
| 278 | Erf1a           | NM_134469   | chr3  | 69594467  | 69596308  | U06119    | estradiol related receptor, alpha 1                                                                     |
| 279 | Erf1            | NM_144866   | chr18 | 35063573  | 35091607  | BC013717  | eukaryotic translation termination factor 1                                                             |
| 280 | Erfh            | NM_026794   | chr3  | 79407723  | 79432642  | BC057670  | electron transferring flavoprotein, dehydrogenase                                                       |
| 281 | Erf1e           | NM_023154   | chr7  | 25372562  | 25393944  | BC094044  | ethylmalonic encephalopathy 1                                                                           |
| 282 | Erf2            | NM_175434   | chr1  | 132733694 | 132733694 | BC010783  | esson 1 (mitochondrial outer membrane) homolog (yeast)                                                  |
| 283 | Ew1             | NM_007988   | chr11 | 49695991  | 4999080   | BC068225  | Ewing sarcoma breakpoint region 1                                                                       |
| 284 | Exoc4           | NM_009148   | chr6  | 33199124  | 33292243  | BC034644  | exocyst complex component 4                                                                             |
| 285 | Exosc2          | NM_144886   | chr2  | 31526235  | 31536840  | BC021807  | exosome component 2                                                                                     |
| 286 | F2              | NM_021388   | chr3  | 115710395 | 115718178 | AF020973  | exostosis (multiple) like 2                                                                             |
| 287 | F2f             | NM_010169   | chr13 | 96371744  | 96388429  | BC031516  | coagulation factor II (thrombin) receptor                                                               |
| 288 | Fads2           | NM_019699   | chr19 | 10137270  | 10257902  | AF126798  | fatty acid desaturase 2                                                                                 |
| 289 | Fahd1           | NM_023490   | chr17 | 24972079  | 24967247  | BC026949  | fumarylacetoacetate hydrolase domain containing 1                                                       |
| 290 | Fain            | NM_0011228  | chr9  | 98861792  | 98902438  | BC079662  | Fas apoptotic inhibitor molecule                                                                        |
| 291 | Farsb           | NM_011811   | chr1  | 78414533  | 78485472  | AF122363  | phen                                                                                                    |



|     |                  |                 |       |           |           |           |                                                                                                             |
|-----|------------------|-----------------|-------|-----------|-----------|-----------|-------------------------------------------------------------------------------------------------------------|
| 492 | Nfe2l2           | NM_010892       | chr2  | 75513573  | 75542720  | BC028943  | nuclear factor, erythroid derived 2, like 2                                                                 |
| 493 | Nfe2l3           | NM_007048       | chr8  | 87232513  | 87242011  | BC003766  | nuclear factor IY                                                                                           |
| 494 | Nfixa            | NM_010607       | chr12 | 66593588  | 66593582  | BC461764  | nuclear factor of kappa light polypeptide gene enhancer in B-cells inhibitor, alpha                         |
| 495 | Nfixb            | NM_023739       | chr4  | 40917976  | 40973025  | AF223576  | nuclear transcription factor, X-box binding 1                                                               |
| 496 | Nfixc            | NM_013610       | chr13 | 49282898  | 49291620  | JU91153   | nurin1                                                                                                      |
| 497 | Nfixd            | NM_010677       | chr8  | 66563666  | 66563661  | BC103763  | NIN1/RNF122 binding protein 1, homolog (S. cerevisiae)                                                      |
| 498 | Nfixe            | NM_145434       | chr11 | 98829246  | 98836941  | BC038898B | nuclear receptor subfamily 1, group D, member 11 thyroid hormone receptor alpha                             |
| 499 | Nfixf            | NM_011584       | chr4  | 19036571  | 19071609  | BC096461  | nuclear receptor subfamily 1, group D, member 2                                                             |
| 500 | Nfixg            | NM_00108396     | chr8  | 79432171  | 79766429  | BC133173  | nuclear receptor subfamily 3, group C, member 2                                                             |
| 501 | Nfixh            | NM_010637       | chr2  | 38578860  | 38578860  | AF352586  | nuclear receptor subfamily 6, group A, member 1                                                             |
| 502 | Nfixi            | NM_010637       | chr3  | 102862152 | 102871837 | BC051443  | neuroblastoma ras oncogene                                                                                  |
| 503 | Nfixj            | NM_033080       | chr7  | 36332204  | 36340947  | X04097    | nuclix (nucleoside diphosphate linked moiety X)-type motif 19                                               |
| 504 | Nfixk            | NM_0010242chr11 |       | 77496857  | 77595294  |           | nuclear fragile X mental retardation protein interacting protein 2                                          |
| 505 | Nfixl            | NM_172849       | chr10 | 126423200 | 12641665  | BC028845  | nucleoporin 133                                                                                             |
| 506 | Nfixm            | NM_172394       | chr11 | 70756560  | 70783475  | BC032929  | nucleoporin 88                                                                                              |
| 507 | Oaa1             | NM_008783       | chr10 | 80289401  | 80292035  | BC084287  | ornithine decarboxylase antizyme 1                                                                          |
| 508 | Odc1             | NM_013614       | chr12 | 17551778  | 17557890  | BC083122  | ornithine decarboxylase, structural 1                                                                       |
| 509 | Oat1             | NM_025829       | chr2  | 7230368   | 7305504   | BC011318  | cbp-like ATase 1                                                                                            |
| 510 | ORF19            | NM_0010377chr17 |       | 66460886  | 66469843  | BC025839  | open reading frame 19                                                                                       |
| 511 | Ornd3            | NM_026661       | chr11 | 98442575  | 98451175  | BC046594  | ORM1-like 3 (S. cerevisiae)                                                                                 |
| 512 | Osgin1           | NM_027950       | chr8  | 121958932 | 121970156 | BC022135  | oxidative stress induced growth inhibitor 1                                                                 |
| 513 | Ostf1            | NM_011735       | chr19 | 18553245  | 18706299  | BC060366  | osteoclast stimulating factor 1                                                                             |
| 514 | Ox1              | NM_130885       | chr15 | 41280573  | 41692594  | BC088481  | oxidation resistance 1                                                                                      |
| 515 | Oxsm             | NM_027695       | chr14 | 17071173  | 17082322  | BC119793  | 3-oxoacyl-ACP synthase, mitochondrial                                                                       |
| 516 | Pan              | NM_008777       | chr10 | 86984682  | 87048880  | BC013438  | phenylalanine hydroxylase                                                                                   |
| 517 | Pan1             | NM_145519       | chr13 | 13321779  | 13249769  | BC015142  | polyadenylate binding protein-interacting protein 1                                                         |
| 518 | Pan3             | NM_028291       | chr5  | 148242465 | 148364518 | BC082547  | PAN3 poly(A) specific ribonuclease subunit homolog (S. cerevisiae)                                          |
| 519 | PanK1            | NM_023792       | chr19 | 34885384  | 34953945  | AF200357  | pantothenate kinase 1                                                                                       |
| 520 | Papd4            | NM_133905       | chr13 | 93917355  | 93962238  | BC016269  | PAP associated domain containing 4                                                                          |
| 521 | Parp1            | NM_198419       | chr2  | 95465236  | 95465238  | AY424238  | poly(ADP-ribose) polymerase family member IX                                                                |
| 522 | Parp12           | NM_172893       | chr6  | 39036412  | 39068348  | BC120733  | poly(ADP-ribose) polymerase family, member 12                                                               |
| 523 | Parp14           | NM_0010395chr16 |       | 35832960  | 35871586  | DG372930  | poly(ADP-ribose) polymerase family, member 14                                                               |
| 524 | Parp16           | NM_174740       | chr9  | 88203166  | 88203166  | BC055477  | poly(ADP-ribose) polymerase family, member 16                                                               |
| 525 | Parp2            | NM_045656       | chr10 | 107169525 | 107828510 | BC085529  | PRKc, apoptosis V1.1, regulator                                                                             |
| 526 | Pcmid2           | NM_163594       | chr2  | 18157268  | 181592157 | BC040385  | protein-L-isopantate (D-aspartate) O-methyltransferase domain containing 2                                  |
| 527 | Pcsk4            | NM_008793       | chr10 | 17944028  | 17972218  | D01093    | proteasome convertase subtilisin/kexin-2                                                                    |
| 528 | Pde9             | NM_006399       | chr17 | 15565525  | 15564245  | U15903    | programmed cell death 2                                                                                     |
| 529 | Pdof3            | NM_026850       | chr1  | 39044849  | 39054081  | BC035601  | phosphoinositide 3-kinase-like 3                                                                            |
| 530 | Pde9a            | NM_008804       | chr17 | 31523196  | 31613254  | AF031147  | phosphodiesterase 9A                                                                                        |
| 531 | Pdhx             | NM_175094       | chr2  | 102861234 | 102913668 | BC061231  | pyruvate dehydrogenase complex, component X                                                                 |
| 532 | Pde9b            | NM_006399       | chr17 | 17273401  | 17291576  | BC006665  | protein disulfide isomerase associated 5                                                                    |
| 533 | Pdk1             | NM_172685       | chr2  | 71771281  | 71747013  | BC027196  | pyruvate dehydrogenase kinase, isoenzyme 1                                                                  |
| 534 | Pdk4             | NM_013743       | chr6  | 5433351   | 5446309   | BC026134  | pyruvate dehydrogenase kinase, isoenzyme 4                                                                  |
| 535 | Pdpr1            | NM_178939       | chr2  | 182834626 | 182841119 | BC031899  | p53 and DNA damage regulated 1                                                                              |
| 536 | Pde2             | NM_027727       | chr10 | 42343333  | 42159769  | AB110840  | pyrenyl (coenzyme I) diphosphate synthase, subunit 2                                                        |
| 537 | Pex11a           | NM_011068       | chr7  | 86882135  | 86887911  | AF093669  | peroxisomal biogenesis factor 11a                                                                           |
| 538 | Pex16            | NM_145122       | chr2  | 92212261  | 92221440  | BC010822  | peroxisome biogenesis factor 16                                                                             |
| 539 | Pex26            | NM_028730       | chr6  | 12113385  | 12114855  | BC019144  | peroxisome biogenesis factor 26                                                                             |
| 540 | Pex6             | NM_145498       | chr17 | 46834812  | 46834963  | BC030424  | peroxisome biogenesis factor 6                                                                              |
| 541 | Pfdn2            | NM_011070       | chr1  | 173275830 | 173288301 | BC049606  | prelfordin 2                                                                                                |
| 542 | Pfkfb3           | NM_133232       | chr2  | 11390662  | 11423694  | BC052400  | 6-phosphofructo-2-kinase/fructose-2,6-bisphosphatase 3                                                      |
| 543 | PHF17            | NM_172303       | chr3  | 41359654  | 41420779  | BC020316  | PHD finger protein 17                                                                                       |
| 544 | Phf18            | NM_153412       | chr16 | 45746368  | 45844519  | BC050451  | phlebotomus homology-like domain, family B, member 2                                                        |
| 545 | Pig              | NM_0010395chr11 |       | 62271788  | 62327402  | BC096678  | phosphatidylinositol glycan anchor biosynthesis, class L                                                    |
| 546 | PHI1D1           | NM_028406       | chr7  | 52409724  | 52415435  | BC088254  | PIH1 domain containing 1                                                                                    |
| 547 | PKR1             | NM_0010774chr13 |       | 102400716 | 102358172 | BC026146  | phosphatidylinositol 3-kinase, regulatory subunit, polypeptide 1 (p85 alpha)                                |
| 548 | Pkn2             | NM_008828       | chr17 | 29827187  | 29827187  | BC019828  | proliferin interaction site 1                                                                               |
| 549 | Pkn3             | NM_145478       | chr15 | 88962624  | 88966159  | BC017621  | proliferin interaction site 3                                                                               |
| 550 | Ppk5k1a          | NM_008847       | chr3  | 94862473  | 94910780  | BC019188  | phosphatidylinositol-4-phosphate 5-kinase, type 1, alpha                                                    |
| 551 | Ppib             | NM_019640       | chr5  | 11175973  | 11181379  | BC034676  | phosphatidylinositol transfer protein, beta                                                                 |
| 552 | Pp1c1            | NM_145623       | chr11 | 107493208 | 107493204 | AB017261  | phosphatidylinositol transfer protein, cytoplasmic 1                                                        |
| 553 | Pi3z2            | NM_023530       | chr10 | 58866140  | 58884738  | BC021592  | phospholipase A2, group XIIB                                                                                |
| 554 | Pi3z1            | NM_021280       | chr2  | 160557046 | 160601496 | BC065091  | phospholipase C, gamma 1                                                                                    |
| 555 | Plekh3           | NM_031258       | chr2  | 76513352  | 76534630  | BC031110  | pleckstrin homology domain-containing, family A (phosphoinositide binding specific) member 3                |
| 556 | Pnkd2            | NM_008828       | chr17 | 19640223  | 19640223  | BC019828  | plexin A2                                                                                                   |
| 557 | Pnkd             | NM_0010395chr17 |       | 88388181  | 88388544  | BC058945  | paroxysmal nonkinetogenic dyskinesia                                                                        |
| 558 | Pp2a2            | NM_025802       | chr7  | 148641105 | 148646842 | BC019188  | patatin-like phospholipase domain containing 2                                                              |
| 559 | Pp2c             | NM_025848       | chr12 | 13262644  | 13262644  | BC006598  | proline-rich nuclear receptor coactivator 2                                                                 |
| 560 | Pp2r1            | NM_028438       | chr10 | 61113669  | 61136216  | BC010468  | pyrophosphatase (inorganic 1)                                                                               |
| 561 | Ppara            | NM_011144       | chr15 | 85666206  | 85633249  | BC016892  | peroxisome proliferator activated receptor alpha                                                            |
| 562 | Pparg1b          | NM_133249       | chr18 | 61457790  | 61560098  | AF453324  | peroxisome proliferator activated receptor, gamma, coactivator 1 beta                                       |
| 563 | Pp1c             | NM_011419       | chr9  | 65607076  | 65614438  | BC045454  | peptidylprolyl isomerase B                                                                                  |
| 564 | Pp1c2            | NM_175523       | chr3  | 57456496  | 57485420  | BC032238  | protein phosphatase 1K (PP2C domain containing)                                                             |
| 565 | Ppp1cc           | NM_013636       | chr5  | 12268288  | 122625278 | BC021646  | protein phosphatase 1, catalytic subunit, gamma isoform                                                     |
| 566 | Ppp11b           | NM_008889       | chr19 | 70495338  | 7051814   | BC082545  | protein phosphatase 1, regulatory (inhibitor) subunit 14B                                                   |
| 567 | Ppp11c           | NM_017130       | chr16 | 36158195  | 36158195  | BC079866  | protein phosphatase 1, regulatory (inhibitor) subunit 3B                                                    |
| 568 | Ppp2r1b          | NM_016591       | chr17 | 21082418  | 21102870  | BC039824  | protein phosphatase 2 (formerly 2A), regulatory subunit A (PR 55), alpha isoform                            |
| 569 | Ppp2r1a          | NM_0010340chr9  |       | 50865540  | 50702334  | BC056218  | protein phosphatase 2 (formerly 2A), regulatory subunit A (PR 85), beta isoform                             |
| 570 | Ppp2r2aLOC100000 | 144880          | chr1  | 19175680  | 19322020  | BC059026  | protein phosphatase 2, regulatory subunit B (B56), alpha isoform [similar to Protein phosphatase 2, regulat |
| 571 | Pp2c1            | NM_028438       | chr10 | 13633374  | 138803374 | AB047878  | protein phosphatase 2, catalytic subunit, alpha isoform                                                     |
| 572 | Pp2c3b           | NM_008914       | chr14 | 21319262  | 21369766  | BC060600  | protein phosphatase 3, catalytic subunit, beta isoform                                                      |
| 573 | Pq1c1            | NM_026861       | chr18 | 80450031  | 80489455  | BC043686  | PQ loop repeat containing 1                                                                                 |
| 574 | Pq1c2            | NM_145384       | chr4  | 13894945  | 13896800  | BC019216  | PQ loop repeat containing 2                                                                                 |
| 575 | Pp4              | NM_007453       | chr1  | 16319243  | 16319243  | AF393682  | proteasome 5                                                                                                |
| 576 | Pp4a             | NM_028902       | chr2  | 132354819 | 132403980 | BC033408  | preimplantation protein 4                                                                                   |
| 577 | Pprk1a           | NM_021880       | chr11 | 109511558 | 109530970 | BC003461  | protein kinase, cAMP dependent regulatory, type I, alpha                                                    |
| 578 | Pprk2            | NM_008857       | chr3  | 30894669  | 30951660  | AK22517   | protein kinase C, iota                                                                                      |
| 579 | Pprk3            | NM_028438       | chr10 | 105885193 | 105885193 | BC059103  | protein kinase, interferon-inducible double stranded RNA dependent inhibitor, repressor of (P58 repressor)  |
| 580 | Pprp19           | NM_134129       | chr19 | 10962646  | 10980022  | BC004070  | PRP19/PSO4 pre-mRNA processing factor 19 homolog (S. cerevisiae)                                            |
| 581 | Pprp6            | NM_133701       | chr2  | 181336078 | 181390366 | BC014869  | PRP6 pre-mRNA splicing factor 6 homolog (yeast)                                                             |
| 582 | Ppr14            | NM_145589       | chr7  | 13461528  | 134620272 | BC055033  | proline rich 14                                                                                             |
| 583 | Ppr16            | NM_0010812chr18 |       | 51273982  | 51273982  | BC132481  | proline rich 16                                                                                             |
| 584 | Ppm10            | NM_013640       | chr8  | 108459639 | 108462015 | U77784    | proteasome (prosome, macropain) subunit, beta type 10                                                       |
| 585 | Ppm1d            | NM_027367       | chr1  | 87961194  | 88035870  | AF107838  | proteasome (prosome, macropain) 26S subunit, non-ATPase, 1                                                  |
| 586 | Ppm1d3           | NM_011875       | chr7  | 148098293 | 148094541 | AF107838  | proteasome (prosome, macropain) 26S subunit, non-ATPase, 13                                                 |
| 587 | Ppm2             | NM_011875       | chr10 | 30898078  | 30970884  | BC039824  | proteasome (prosome, macropain) 26S subunit, non-ATPase, 2                                                  |
| 588 | Ppm2d            | NM_008951       | chr3  | 94836619  | 94846467  | AB029144  | proteasome (prosome, macropain) 26S subunit, non-ATPase, 4                                                  |
| 589 | Ppm3             | NM_028445       | chr7  | 29959271  | 29985550  | BC004075  | proteasome (prosome, macropain) 26S subunit, non-ATPase, 8                                                  |
| 590 | Ppm9             | NM_008951       | chr3  | 120763255 | 123700740 | BC051930  | proteasome (prosome, macropain) 26S subunit, non-ATPase, 9                                                  |
| 591 | Ppm9b            | NM_011100       | chr14 | 56206277  | 56209638  | BC052880  | proteasome (prosome, macropain) 26S subunit, beta                                                           |
| 592 | Pstpp2           | NM_013831       | chr18 | 78033042  | 78120553  | CT010308  | proline-serine-threonine phosphatase-interacting protein 2                                                  |
| 593 | Ptp1             | NM_0010736chr10 |       | 79317350  | 79327178  | BC007472  | poly(pyrimidine tract binding protein 1                                                                     |
| 594 | Ptp2             | NM_026815       | chr13 | 100169604 | 100114642 | BC025110  | pentatricopeptide repeat domain 2                                                                           |
| 595 | Ptcd3            | NM_027275       | chr6  | 71830628  | 71868134  | BC115434  | pentatricopeptide repeat domain 3                                                                           |
| 596 | Ptdad1           | NM_021345       | chr9  | 64834790  | 64896520  | BC031755  | protein tyrosine phosphatase-like domain containing 1                                                       |
| 597 | Ptpn11           | NM_025576       | chr2  | 90750870  | 90758197  | BC026950  | protein tyrosine phosphatase, mitochondrial                                                                 |
| 598 | Ptpn4            | NM_011534       | chr2  | 154123405 | 15423405  | BC025796  | peroxisomal membrane protein 4                                                                              |
| 599 | Ppyd             | NM_026412       | chr15 | 75746604  | 75752064  | BC026336  | pyruvate-5-carboxylase reductase-like                                                                       |
| 600 | Qars             | NM_133794       | chr9  | 108410380 | 108418268 | BC079854  | glutamyl-tRNA synthetase                                                                                    |
| 601 | Rab11a           | NM_017382       | chr9  | 64663107  | 64685563  | BC010722  | RAB11a, member RAS oncogene family                                                                          |
| 602 | Rab11b           | NM_008951       | chr2  | 30898078  | 30970884  | BC039824  | RAB11, member RAS oncogene family                                                                           |
| 603 | Rab17            | NM_008958       | chr1  | 92854710  | 92866197  | BC051071  | RAB17, member RAS oncogene family                                                                           |
| 604 | Rab1b            | NM_028576       | chr19 | 5099205   | 5106996   | BC016408  | RAB1b, member RAS oncogene family                                                                           |
| 605 | Rab3gap1         | NM_178690       | chr1  | 12976593  | 12984045  | BC046297  | RAB3 GTPase activating protein subunit 1                                                                    |
| 606 | Rab3gap2         | NM_008958       | chr2  | 87138947  | 87167173  | BC010248  | RAB3g, member RAS oncogene family                                                                           |
| 607 | Rab5a            | NM_026887       | chr17 | 53619559  | 53647005  | BC096481  | RAB5A, member RAS oncogene family                                                                           |
| 608 | Rabac1           | NM_010261       | chr7  | 25764767  | 25757747  | AF262866  | Rab acceptor 1 (prenylated)                                                                                 |
| 609 | Rabepk           | NM_145522       | chr2  | 34634186  | 34655311  | BC019800  | Rab2 effector protein with ketch motifs                                                                     |
| 610 | Rabg1            | NM_145122       | chr2  | 92398906  | 92398906  | BC031774  | RAB GTPase activating protein                                                                               |
| 611 | Rab11            | NM_145824       | chr8  | 106291845 | 106351250 | AY337314  | RAN binding protein 10                                                                                      |
| 612 | Ragelb           | NM_175258       | chr11 | 54336349  | 54512787  | BC059847  | Rap guanine nucleotide exchange factor (GEF) 6                                                              |
| 613 | RasGEF3          | NM_138956       | chr10 | 120847406 | 120913361 | BC011517  | Ras association (RA/GOS/RAF) domain family member 3                                                         |
| 614 | Rbc1             | NM_008926       | chr1  | 6294743   | 628666    | AB076819  | RBI1-inducible coiled-coil 1                                                                                |
| 615 | Rbbp5            | NM_172517       | chr1  | 134329764 | 134402236 | BC057632  | retinoblastoma binding protein 5                                                                            |
| 616 | Rbbp7            | NM_009031       | chrX  | 159198365 | 159217022 | BC003785  | retinoblastoma binding protein 7                                                                            |
| 617 | Rbks             | NM_153196       | chr5  | 31826399  | 32000000  | BC023239  | ribokinase                                                                                                  |
| 618 | Rbm17            | NM_132624       | chr2  | 11507066  | 11524626  | BC13489   |                                                                                                             |

|     |          |            |       |            |            |           |                                                                                                                          |
|-----|----------|------------|-------|------------|------------|-----------|--------------------------------------------------------------------------------------------------------------------------|
| 656 | Sar1b    | NM_025535  | chr11 | 51577189   | 51605428   | BC085178  | SAR1 gene homolog B (S. cerevisiae)                                                                                      |
| 657 | Sars     | NM_010322  | chr3  | 16622783   | 16624087   | BC080812  | arylaminoacyl-tRNA synthetase                                                                                            |
| 658 | Sars1    | NM_145587  | chr7  | 132416133  | 13343830   | BC031769  | SH3-binding kinase 1                                                                                                     |
| 659 | Scamp1   | NM_029163  | chr13 | 94971388   | 95055236   | BC034283  | secretory carrier membrane protein 1                                                                                     |
| 660 | Scap     | NM_0010014 | chr9  | 110233831  | 110287450  | BC070437  | SREBF chaperone                                                                                                          |
| 661 | Scaper   | NM_005813  | chr9  | 55596957   | 55761742   | BC046556  | S phase cyclin A-associated protein in the ER                                                                            |
| 662 | Scd1     | NM_016741  | chr5  | 12575460   | 12582887   | BC004656  | scavenger receptor class B, member 1                                                                                     |
| 663 | Scy3     | NM_028776  | chr1  | 16589921   | 165885257  | BC043085  | SCY1-like 3 (S. cerevisiae)                                                                                              |
| 664 | Scd2     | NM_008304  | chr15 | 32850478   | 32964476   | UJ0674    | syndecan 2                                                                                                               |
| 665 | Scd4     | NM_013521  | chr2  | 1624249747 | 164268669  | UJ0674    | syndecan 4                                                                                                               |
| 666 | Scnd     | NM_025649  | chr9  | 50404451   | 50411922   | BC145731  | succinate dehydrogenase complex, subunit D, integral membrane protein                                                    |
| 667 | Sec23a   | NM_008147  | chr12 | 60093271   | 60113004   | BC034610  | SEC23A (S. cerevisiae)                                                                                                   |
| 668 | Seh1     | NM_001039  | chr18 | 67934488   | 67955141   | BC027244  | SEH1-like 1 (S. cerevisiae)                                                                                              |
| 669 | Sepp5    | NM_013023  | chr16 | 31362330   | 31362330   | BC026830  | SLMO/ventrin specific peptidase 5                                                                                        |
| 670 | Sep-10   | NM_0010249 | chr10 | 95604375   | 95684595   | BC053752  | septin 10                                                                                                                |
| 671 | Sep1     | NM_013759  | chr17 | 24873587   | 24879723   | BC080646  | selenoprotein X 1                                                                                                        |
| 672 | Serp1    | NM_025814  | chr6  | 67216973   | 67239597   | BC013665  | Serpine1 mRNA binding protein 1                                                                                          |
| 673 | Sernc3   | NM_010332  | chr12 | 18344900   | 18347067   | AB029498  | serine incorporator 3                                                                                                    |
| 674 | Sernc5   | NM_172588  | chr13 | 93381093   | 93499751   | BC062131  | serine incorporator 5                                                                                                    |
| 675 | Serpinf2 | NM_008878  | chr11 | 75245238   | 75253005   | BC026756  | serine (or cysteine) peptidase inhibitor, clade F, member 2                                                              |
| 676 | SFI      | NM_0011079 | chr19 | 6363943    | 6377196    | BC009091  | splicing factor 1                                                                                                        |
| 677 | Sf3b1    | NM_010179  | chr1  | 55024313   | 55084323   | AB037860  | splicing factor 3b, subunit 1                                                                                            |
| 678 | Sfns1    | NM_013747  | chr11 | 87861173   | 87867259   | BC048773  | splicing factor, arginine/serine-rich 1 (ASF/SF2)   similar to splicing factor, arginine/serine-rich 1 (splicing factor) |
| 679 | Sfns1    | NM_0010937 | chr3  | 157673608  | 157696878  | BC037053  | splicing factor, arginine/serine-rich 11                                                                                 |
| 680 | Sfns3    | NM_013663  | chr17 | 29169818   | 29180311   | BC071196  | splicing factor, arginine/serine-rich 3 (SRP20)                                                                          |
| 681 | Sfns5    | NM_010329  | chr1  | 128676183  | 12871968   | BC026993  | splicing factor, arginine/serine-rich 5 (SRP40, HRS)                                                                     |
| 682 | Sfnd1    | NM_134114  | chr11 | 45855317   | 45855796   | BC091770  | SFT2 domain containing 1   hypothetical protein LOC100038858   hypothetical protein LOC100044184                         |
| 683 | Sgpl1    | NM_009163  | chr10 | 60561390   | 60610347   | BC026135  | sphingosine phosphate lyase 1                                                                                            |
| 684 | Sh3grip1 | NM_019464  | chr3  | 144347972  | 144383287  | AF272946  | SH3-domain GRB2-like B1 (endophilin)                                                                                     |
| 685 | Sh3p1    | NM_013033  | chr12 | 31596534   | 31610023   | BC110043  | SH3 domain YSC-like 1                                                                                                    |
| 686 | Shpr     | NM_172937  | chr10 | 10869257   | 10935067   | AY162284  | SNF2 histone linker PHD RING domain                                                                                      |
| 687 | Shn3a    | NM_011378  | chr9  | 56924183   | 56976175   | UJ2334    | transcriptional regulator, SHN3A (yeast)                                                                                 |
| 688 | Shn3b1   | NM_011379  | chr12 | 82012772   | 82012772   | BC003303  | solute carrier family 10 (sodium/bile acid cotransporter family), member 1                                               |
| 689 | Shn3c1   | NM_011379  | chr12 | 120024536  | 120037251  | UY2696    | solute carrier family 20, member 1                                                                                       |
| 690 | Shc22a5  | NM_011396  | chr11 | 53878030   | 53705162   | BC031118  | solute carrier family 22 (organic cation transporter), member 5                                                          |
| 691 | Shc25a22 | NM_026646  | chr7  | 148615648  | 148623726  | BC050887  | solute carrier family 25 (mitochondrial carrier, glutamate), member 22                                                   |
| 692 | Shc25a40 | NM_170156  | chr5  | 9422658    | 9422658    | BC083103  | solute carrier family 25, member 40                                                                                      |
| 693 | Shc49    | NM_0010224 | chr5  | 38740545   | 38893391   | AF464840  | solute carrier family 2 (facilitated glucose transporter), member 9                                                      |
| 694 | Shc30a10 | NM_0010332 | chr1  | 18727827   | 187292641  | BC054548  | solute carrier family 30, member 10                                                                                      |
| 695 | Shc31a1  | NM_175900  | chr4  | 62021783   | 62052801   | BC034674  | solute carrier family 31, member 1                                                                                       |
| 696 | Shc35a3  | NM_013761  | chr16 | 116145198  | 116145198  | BC024110  | solute carrier family 35 (UDP-N-acetylglucosamine (UDP-GlcNAc) transporter), member 3                                    |
| 697 | Shc35b1  | NM_029162  | chr11 | 95246236   | 95252883   | DT980     | solute carrier family 35, member B1                                                                                      |
| 698 | Shc35c2  | NM_144893  | chr2  | 165102054  | 165113327  | BC094025  | solute carrier family 35, member C2                                                                                      |
| 699 | Shc37a4  | NM_008063  | chr9  | 44206259   | 44211051   | BC076555  | solute carrier family 37 (glucose-6-phosphate transporter), member 4                                                     |
| 700 | Shc46a3  | NM_010782  | chr11 | 1687083017 | 1687083017 | BC066902  | solute carrier family 46, member 3                                                                                       |
| 701 | Shc5a3   | NM_017391  | chr16 | 92077302   | 92079458   | BC031118  | solute carrier family 5 (inositol transporters), member 3                                                                |
| 702 | Shca3r1  | NM_012030  | chr11 | 115024655  | 115042493  | BC085141  | solute carrier family 9 (sodium/hydrogen exchanger), member 3 regulator 1                                                |
| 703 | Shmd2    | NM_025531  | chr2  | 17420592   | 17429844   | BC026968  | slowmo homolog 2 (Drosophila)                                                                                            |
| 704 | Shna3    | NM_010332  | chr1  | 63849474   | 63858091   | BC068850  | SH3 domain containing 3 (Drosophila)                                                                                     |
| 705 | Smara2   | NM_011416  | chr19 | 26679650   | 26855811   | BC075641  | SWI/SNF related, matrix associated, actin dependent regulator of chromatin, subfamily a, member 2                        |
| 706 | Smc4     | NM_133786  | chr3  | 68808884   | 68838551   | BC061814  | structural maintenance of chromosomes 4                                                                                  |
| 707 | Smek2    | NM_134034  | chr11 | 29072967   | 29119860   | BC009870  | SMEX homolog 2, suppressor of prokies 4 (Dicyctostelium)                                                                 |
| 708 | Snb1     | NM_016867  | chr15 | 58780709   | 58780709   | UJ6867    | synaptobrevin, basic 1                                                                                                   |
| 709 | Snw1     | NM_025507  | chr12 | 88790860   | 88809727   | BC049245  | SNW domain containing 1                                                                                                  |
| 710 | Snx4     | NM_080557  | chr16 | 33251630   | 33300355   | BC016599  | sorting nexin 4                                                                                                          |
| 711 | Snx5     | NM_024225  | chr2  | 144075862  | 144086007  | BC002242  | sorting nexin 5                                                                                                          |
| 712 | Sp1      | NM_013012  | chr15 | 102283789  | 102283789  | AF222463  | trans-acting transcription factor 1                                                                                      |
| 713 | Sp4      | NM_009239  | chr12 | 119473406  | 119539843  | BC076630  | trans-acting transcription factor 4                                                                                      |
| 714 | Spag9    | NM_027699  | chr11 | 93857405   | 93887694   | BC094070  | spERM associated antigen 9                                                                                               |
| 715 | Spcc25   | NM_025565  | chr2  | 69031952   | 69044214   | BC033605  | SPC25, NDC80 kinetochore complex component, homolog (S. cerevisiae)                                                      |
| 716 | Spca2    | NM_176306  | chr11 | 26989923   | 27018144   | BC033605  | spectrin beta 2                                                                                                          |
| 717 | Spnb3    | NM_021287  | chr19 | 4711223    | 4752352    | BC079860  | spectrin beta 3                                                                                                          |
| 718 | Spre2    | NM_033523  | chr11 | 19624375   | 19622600   | BC066013  | sprouty-related, EVH1 domain containing 2                                                                                |
| 719 | Spry4    | NM_011898  | chr18 | 38745915   | 38761069   | BC050944  | sprouty homolog 4 (Drosophila)                                                                                           |
| 720 | Sptm1    | NM_017411  | chr11 | 50244654   | 50244654   | UJ7413    | squidheadless 1                                                                                                          |
| 721 | Sra1     | NM_025291  | chr18 | 38328900   | 38329592   | BC043832  | steroid receptor RNA activator 1                                                                                         |
| 722 | Srp2     | NM_009274  | chr5  | 23009174   | 23122266   | BC062941  | serine/arginine-rich protein specific kinase 2                                                                           |
| 723 | Srm2     | NM_175900  | chr4  | 29072967   | 29119860   | BC019860  | serine/arginine repetitive matrix 2                                                                                      |
| 724 | Srn2     | NM_133726  | chr15 | 81195470   | 81230124   | BC033843  | suppression of tumorigenesis 13                                                                                          |
| 725 | Sr3gal1  | NM_009177  | chr15 | 66934437   | 67008444   | BC099693  | ST3 beta-galactoside alpha-2,3-sialyltransferase 1                                                                       |
| 726 | Sr3gal2  | NM_009178  | chr9  | 34854161   | 34862395   | BC050773  | ST3 beta-galactoside alpha-2,3-sialyltransferase 4                                                                       |
| 727 | Sr3gal3  | NM_011414  | chr2  | 13895759   | 14069595   | BC044666  | signal transducing adaptor molecule (SH3 domain and ITAM motif) 1                                                        |
| 728 | Star2n1  | NM_024270  | chr13 | 19446545   | 19487821   | BC033334  | STAR3 N-terminal like                                                                                                    |
| 729 | Star4    | NM_133774  | chr18 | 33361075   | 33373470   | BC005642  | STAR-related lipid transfer (START) domain containing 4                                                                  |
| 730 | Star7    | NM_133908  | chr2  | 127059575  | 127124676  | BC017524  | STAR domain containing 7                                                                                                 |
| 731 | Stk24    | NM_144825  | chr14 | 121626563  | 121626563  | AY188257  | serine/threonine kinase 24 (STE20 homolog, yeast)                                                                        |
| 732 | Stk4     | NM_014240  | chr2  | 16399988   | 163881260  | BC054527  | serine/threonine kinase 4                                                                                                |
| 733 | Stra3    | NM_011499  | chr6  | 137683645  | 137699786  | AF062825  | serine/threonine kinase receptor associated protein                                                                      |
| 734 | Strap    | NM_008408  | chr9  | 36538958   | 36578239   | AK129027  | STT3, subunit of the oligosaccharyltransferase complex, homolog A (S. cerevisiae)                                        |
| 735 | Sub1     | NM_010179  | chr1  | 26989923   | 27018144   | BC033605  | STT1 homolog and U2-1 Box containing protein 1                                                                           |
| 736 | Sub4a    | NM_009294  | chr7  | 13498532   | 134992497  | BC005791  | syntaxin 4A (placental)                                                                                                  |
| 737 | Sub1     | NM_011284  | chr15 | 11911094   | 11925762   | UJ3750    | SUB1 homolog (S. cerevisiae)                                                                                             |
| 738 | Suda3    | NM_178222  | chr5  | 117541689  | 117595955  | BC055764  | suppressor of defective silencing 3 homolog (S. cerevisiae)                                                              |
| 739 | Sunm1    | NM_009461  | chr1  | 59826381   | 59826381   | BC033158  | SMT3 suppressor of mid two 3 homolog 1 (yeast)                                                                           |
| 740 | Sunm3    | NM_019929  | chr10 | 77069979   | 77081076   | AF063847  | SMT3 suppressor of mid two 3 homolog 3 (yeast)                                                                           |
| 741 | Tac1     | NM_144825  | chr14 | 121626563  | 121626563  | BC019960  | TAO kinase 1                                                                                                             |
| 742 | Tarbp    | NM_145559  | chr4  | 14798841   | 14800105   | BC025544  | TAR DNA binding protein                                                                                                  |
| 743 | Tars2    | NM_029074  | chr15 | 11313118   | 11323118   | BC055911  | threonyl-tRNA synthetase                                                                                                 |
| 744 | Tars2    | NM_029311  | chr3  | 95543897   | 95558785   | BC080995  | threonyl-tRNA synthetase 2, mitochondrial (putative)                                                                     |
| 745 | Tax1bp1  | NM_025816  | chr6  | 52663742   | 52716484   | BC014798  | Tax1 (human T-cell leukemia virus type I) binding protein 1                                                              |
| 746 | Tbc1d17  | NM_0010428 | chr7  | 52096146   | 52104440   | BC017607  | TBC1 domain family, member 17                                                                                            |
| 747 | Tbc1d20  | NM_024195  | chr2  | 15213908   | 15213908   | BC017607  | TBC1 domain family, member 20                                                                                            |
| 748 | Tbc1     | NM_025548  | chr7  | 31009150   | 31018055   | BC010684  | tubulin folding cofactor B                                                                                               |
| 749 | Tbc1     | NM_178337  | chr13 | 14090218   | 14131905   | AY182332  | tubulin-specific cofactor E                                                                                              |
| 750 | Tbc1     | NM_173038  | chr9  | 42220400   | 42280300   | M12869    | tubulin folding cofactor E-like                                                                                          |
| 751 | Tcp1     | NM_013698  | chr17 | 131193311  | 13117933   | M12869    | T-complex protein 1                                                                                                      |
| 752 | Tcp112   | NM_146008  | chr10 | 84039692   | 84077104   | BC029663  | T-complex 11 (mouse) like 2                                                                                              |
| 753 | Tef      | NM_017376  | chr15 | 81633209   | 81857293   | BC036982  | tryptophan embryonic factor                                                                                              |
| 754 | Tef2     | NM_008632  | chr11 | 106303548  | 106742244  | BC036982  | tryptophan embryonic factor                                                                                              |
| 755 | Tefc     | NM_011638  | chr16 | 32809103   | 32832876   | BC057406  | testis expressed gene 2                                                                                                  |
| 756 | Tefc     | NM_009372  | chr17 | 71193551   | 71202835   | BC057424  | transferrin receptor 1                                                                                                   |
| 757 | Tefm2    | NM_009373  | chr2  | 157942138  | 157972128  | BC016492  | TG interacting factor 1                                                                                                  |
| 758 | Tefm3    | NM_025560  | chr1  | 96501667   | 96551441   | BC016492  | transglutaminase 2, C polypeptide                                                                                        |
| 759 | Thcp2    | NM_028597  | chr13 | 54560379   | 54570180   | BC037589A | T-HAP domain containing 4                                                                                                |
| 760 | Timm10   | NM_013899  | chr2  | 84667178   | 84670370   | BC013448  | translocase of inner mitochondrial membrane 10 homolog (yeast)   translocase of inner mitochondrial membrane 10          |
| 761 | Timm17a  | NM_011590  | chr2  | 137198112  | 137210314  | BC098216  | translocase of inner mitochondrial membrane 17a                                                                          |
| 762 | Timm44   | NM_010322  | chr1  | 4239734    | 4239734    | UJ68698   | translocase of inner mitochondrial membrane 44                                                                           |
| 763 | Timm8    | NM_013896  | chr12 | 72224159   | 72237662   | BC024370  | translocase of inner mitochondrial membrane 8 homolog (yeast)                                                            |
| 764 | Tipap    | NM_178892  | chr3  | 65332369   | 65394440   | BC083173  | T(CDD)-inducible poly(ADP-ribose) polymerase                                                                             |
| 765 | Tirap    | NM_054056  | chr9  | 34994345   | 35006906   | AF378130  | tol-1/interleukin 1 receptor (TIR) domain-containing adaptor protein                                                     |
| 766 | Tis1     | NM_011638  | chr16 | 32832876   | 32832876   | BC017607  | transducin-like enhancer of split 1, homolog of Drosophila E(spl)                                                        |
| 767 | Tm7sf9   | NM_026281  | chr6  | 146552011  | 146583062  | BC104529  | transmembrane 7 superfamily member 9                                                                                     |
| 768 | Tm9sf2   | NM_080556  | chr14 | 122506304  | 122558825  | BC003862  | transmembrane 9 superfamily member 2                                                                                     |
| 769 | Tm9sf9   | NM_133352  | chr19 | 121285332  | 141338494  | AF269151  | transmembrane 9 superfamily member 3                                                                                     |
| 770 | Tmem20   | NM_0010004 | chr6  | 108616680  | 108616680  | BC013023  | transmembrane 20 (protein transport domain containing 5)   similar to Transmembrane emp24 protein 1                      |
| 771 | Tmem120a | NM_172541  | chr5  | 136211359  | 136220045  | BC046757  | transmembrane protein 120A                                                                                               |
| 772 | Tmem126b | NM_026734  | chr7  | 97817333   | 97624505   | BC049680  | transmembrane protein 126B                                                                                               |
| 773 | Tmem134  | NM_0010786 | chr19 | 4125959    | 4132285    | BC026765  | transmembrane protein 134                                                                                                |
| 774 | Tmem183a | NM_026836  | chr12 | 136263876  | 136263876  | BC030320  | transmembrane protein 183A                                                                                               |
| 775 | Tmem33   | NM_028975  | chr5  | 67951891   | 67827000   | BC016570  | transmembrane protein 33                                                                                                 |
| 776 | Tmem1a   | NM_025693  | chr16 | 21034399   | 21947617   | BC019730  | transmembrane protein 41a                                                                                                |
| 777 | Tmem1b   | NM_153525  | chr7  | 11715701   | 117129768  | BC088799  | transmembrane protein 41B                                                                                                |
| 778 | Tmem51   | NM_145402  | chr4  | 141586907  | 14184219   | BC033277  | transmembrane protein 51                                                                                                 |
| 779 | Tmem57   | NM_025382  | chr4  | 134358674  | 134409260  | AY846873  | transmembrane protein 57                                                                                                 |
| 780 | Tmem69   | NM_177670  | chr4  | 116224133  | 116228541  | BC106178  | transmembrane protein 69                                                                                                 |
| 781 | Tmem85   | NM_026519  | chr2  | 112203186  | 112208184  | BC051926  | transmembrane protein 85                                                                                                 |
| 782 | Tmem88   | NM_026248  | chr2  | 128644047  | 128677528  | BC051926  | transmembrane protein 87B                                                                                                |
| 783 | Tmem93   | NM_025318  | chr11 | 72989021   | 72990539   | BC022104  | transmembrane protein 93</                                                                                               |

|     |                |            |       |           |           |          |                                                                                                                            |
|-----|----------------|------------|-------|-----------|-----------|----------|----------------------------------------------------------------------------------------------------------------------------|
| 820 | Ubc2b          | NM_009468  | chr11 | 51799064  | 51813889  | U57690   | ubiquitin-conjugating enzyme E2B, RAD6 homology (S. cerevisiae)                                                            |
| 821 | Ubc2c          | NM_144839  | chr14 | 18606891  | 19726741  | BC016265 | ubiquitin-conjugating enzyme E2E 2 (UBC25 homology, yeast)                                                                 |
| 822 | Ubc2f          | NM_026454  | chr1  | 93147143  | 93182501  | BC016117 | ubiquitin-conjugating enzyme E2F (putative)                                                                                |
| 823 | Ubc2k          | NM_016786  | chr5  | 65928510  | 65990167  | AB011081 | ubiquitin-conjugating enzyme E2K (UBC1 homology, yeast)                                                                    |
| 824 | Ubc2n          | NM_080560  | chr10 | 94977796  | 95008292  | BC067069 | ubiquitin-conjugating enzyme E2N                                                                                           |
| 825 | Ubc2q1         | NM_027315  | chr3  | 89577538  | 89587922  | BC088275 | ubiquitin-conjugating enzyme E2C (putative) 1                                                                              |
| 826 | Ubc4b          | NM_022022  | chr4  | 148702525 | 148800858 | AF260026 | ubiquitination factor E4b, UFD2 homology (S. cerevisiae)                                                                   |
| 827 | Ubcn1          | NM_162234  | chr13 | 58277523  | 58316997  | BC026847 | ubiquitin 1                                                                                                                |
| 828 | Ubr1           | NM_009461  | chr2  | 120687382 | 120796451 | AF061555 | ubiquitin protein ligase E3 component n-recognition 1                                                                      |
| 829 | Ubr5           | NM_019562  | chr1  | 145624442 | 145654075 | AF176563 | ubiquitin carboxy-terminal esterase L5                                                                                     |
| 830 | Ubr11          | NM_011672  | chr16 | 18812402  | 18835348  | BC006630 | ubiquitin fusion degradation 1 like                                                                                        |
| 831 | Ugag           | NM_011673  | chr4  | 59202331  | 59238705  | BC005028 | UDP-glucose ceramide glucosyltransferase                                                                                   |
| 832 | UHRF1bp1       | NM_029166  | chr10 | 89207771  | 89281145  | BC132134 | UHRF1 (UBP90) binding protein 1-like                                                                                       |
| 833 | Uln3a6         | NM_109432  | chr15 | 79554500  | 79572960  | BC088208 | unc-34 homolog B (C. elegans)                                                                                              |
| 834 | Uqcrc2         | NM_025899  | chr7  | 127778703 | 127803037 | BC003423 | ubiquinol cytochrome c reductase core protein 2                                                                            |
| 835 | Usp12          | NM_011669  | chr5  | 147546385 | 147606532 | BC049274 | ubiquitin specific peptidase 12                                                                                            |
| 836 | Usp32          | NM_0010299 | chr11 | 84797992  | 84917463  |          | ubiquitin specific peptidase 32                                                                                            |
| 837 | Usp47          | NM_133738  | chr7  | 119187020 | 119254900 | BC108425 | ubiquitin specific peptidase 47                                                                                            |
| 838 | Utrn           | NM_011682  | chr10 | 12101986  | 12581533  | X63506   | utrophin                                                                                                                   |
| 839 | Uxs1           | NM_026430  | chr1  | 43806132  | 43884593  | BC037049 | UDP-glucuronate decarboxylase 1                                                                                            |
| 840 | Vav2           | NM_009500  | chr2  | 27117628  | 27282432  | BC053060 | nav 2 oncogene                                                                                                             |
| 841 | Vpsa2          | NM_011695  | chr14 | 23550783  | 22665101  | U08838   | voltage-dependent anion channel 2                                                                                          |
| 842 | VeZF1          | NM_016696  | chr11 | 87881781  | 87898231  | AF104410 | vascular endothelial zinc finger 1                                                                                         |
| 843 | Vps11          | NM_027889  | chr9  | 44156175  | 44169753  | BC029004 | vacuolar protein sorting 11 (yeast)                                                                                        |
| 844 | Vps36          | NM_027338  | chr8  | 23303332  | 23320068  | BC101811 | vacuolar protein sorting 36 (yeast)                                                                                        |
| 845 | Vps4b          | NM_009190  | chr1  | 108686015 | 108693263 | L101119  | vacuolar protein sorting 4b (yeast)                                                                                        |
| 846 | Vh1a           | NM_016682  | chr19 | 55390547  | 55701799  | BC089321 | vesicle transport through interaction with L-SNAREs homolog 1A (yeast)                                                     |
| 847 | WacLOC100044   | NM_153085  | chr18 | 7669237   | 7927076   | BC080851 | WW domain containing adaptor with coiled-coil   similar to WW domain-containing adaptor protein with coiled-coil 1 (human) |
| 848 | Wasl           | NM_028459  | chr6  | 24563803  | 24614988  | BC055045 | Wiskott-Aldrich syndrome-like (human)                                                                                      |
| 849 | Wbcscr27       | NM_024479  | chr5  | 135408243 | 135418507 | AY354925 | Williams Beuren syndrome chromosome region 27 (human)                                                                      |
| 850 | Wdr26LOC100048 | NM_145514  | chr1  | 183107492 | 183142109 |          | WD repeat domain 26   similar to myocardial ischemic preconditioning upregulated protein 2                                 |
| 851 | Wdr1           | NM_0011100 | chr18 | 32968894  | 33025687  | BC094453 | WD repeat domain 36                                                                                                        |
| 852 | Wdr37          | NM_172445  | chr13 | 860214    | 8870976   | BC048236 | WD repeat domain 37                                                                                                        |
| 853 | Wdr42a         | NM_153555  | chr1  | 174078215 | 174128200 | BC076541 | WD repeat domain 42A                                                                                                       |
| 854 | Wdr45          | NM_025793  | chr11 | 121188548 | 121215723 | BC004595 | Wdr45 like                                                                                                                 |
| 855 | Wdr6           | NM_031392  | chr9  | 108474642 | 108481070 | BC050894 | WD repeat domain 6                                                                                                         |
| 856 | Wes1           | NM_009516  | chr7  | 117265753 | 117298813 | BC006652 | wes 1 homolog (S. pombe)                                                                                                   |
| 857 | Wheez2         | NM_011914  | chr5  | 34240571  | 34273971  | BC038003 | Wolf-Hirschhorn syndrome candidate 2 (human)                                                                               |
| 858 | Wnt5b          | NM_009525  | chr6  | 119382551 | 119494336 | BC010775 | wingless-related MMTV integration site 5B                                                                                  |
| 859 | Wwr1           | NM_133784  | chr3  | 57259571  | 57379802  | BC014727 | WW domain containing transcription regulator 1                                                                             |
| 860 | Xmr2           | NM_011917  | chr2  | 146838755 | 146903736 | BC054743 | 5'-3' exoribonuclease 2                                                                                                    |
| 861 | Yps5           | NM_027166  | chr17 | 73186044  | 73200535  | BC085109 | ypsp5-like 5 (Drosophila)                                                                                                  |
| 862 | Ywha9          | NM_011739  | chr12 | 21396190  | 21423297  | BC090838 | tyrosine 3-monooxygenase/tryptophan 5-monooxygenase activation protein, theta polypeptide                                  |
| 863 | Yy1            | NM_009537  | chr12 | 110031521 | 110054842 | M73963   | YY1 transcription factor                                                                                                   |
| 864 | Zc3h91         | NM_028664  | chr6  | 38257198  | 38304093  | BC029060 | zinc finger CCH type, antiviral 1                                                                                          |
| 865 | Zc3hc6         | NM_153538  | chr13 | 59873237  | 59924462  | BC043111 | zinc finger, CCHC domain containing 6                                                                                      |
| 866 | Zfhc20         | NM_028492  | chr14 | 58451539  | 58509116  | BC019536 | zinc finger, DHHC domain containing 20                                                                                     |
| 867 | Zfand2b        | NM_028846  | chr1  | 75165284  | 75168199  | BC011495 | zinc finger, AN1 type domain 2B                                                                                            |
| 868 | Zfand3         | NM_148926  | chr17 | 30142032  | 30349697  | BC083124 | zinc finger, AN1-type domain 3                                                                                             |
| 869 | Zfand5LOC10004 | NM_009551  | chr19 | 21346768  | 21356779  | BC119124 | zinc finger, AN1-type domain 5   similar to zinc finger protein ZNF216                                                     |
| 870 | Zfx3           | NM_007496  | chr8  | 111238544 | 111485536 | D26046   | zinc finger homeobox 3                                                                                                     |
| 871 | Zfp187         | NM_0010137 | chr13 | 21534099  | 21541324  | BC068174 | zinc finger protein 187                                                                                                    |
| 872 | Zfp192         | NM_139141  | chr13 | 21636391  | 21622890  |          | zinc finger protein 192                                                                                                    |
| 873 | Zfp260         | NM_011981  | chr7  | 30880095  | 30892633  | BC085180 | zinc finger protein 260                                                                                                    |
| 874 | Zfp277         | NM_172575  | chr12 | 41041633  | 41123871  | BC043453 | zinc finger protein 277                                                                                                    |
| 875 | Zfp295         | NM_175428  | chr16 | 98188997  | 98183786  | BC051176 | zinc finger protein 295                                                                                                    |
| 876 | Zfp36          | NM_011756  | chr7  | 29181803  | 29165272  | M58891   | zinc finger protein 36                                                                                                     |
| 877 | Zfp361         | NM_007584  | chr12 | 81208747  | 81214000  | M58566   | zinc finger protein 36, C3H type-like 1                                                                                    |
| 878 | Zfp518         | NM_028319  | chr19 | 40986119  | 40990552  |          | zinc finger protein 518                                                                                                    |
| 879 | Zfp523         | NM_172617  | chr17 | 28314152  | 28342631  | BC060611 | zinc finger protein 523                                                                                                    |
| 880 | Zfp522         | NM_144523  | chr15 | 25914121  | 25928237  | BC036964 | zinc finger protein 522                                                                                                    |
| 881 | Zfp707         | NM_0010810 | chr15 | 75799649  | 75806176  | BC028404 | zinc finger protein 707                                                                                                    |
| 882 | Zfp810         | NM_145612  | chr9  | 22081192  | 22112082  | BC005471 | zinc finger protein 810                                                                                                    |
| 883 | Zfp            | NM_011767  | chr15 | 12047608  | 12115198  | AF071059 | zinc finger RNA binding protein                                                                                            |
| 884 | Zfyw26         | NM_0010085 | chr12 | 80333334  | 80397269  | BC048379 | zinc finger, FYVE domain containing 26                                                                                     |
| 885 | Zfzc2          | NM_026250  | chr1  | 95886772  | 95969285  | BC033572 | zinc finger, H2C2 domain containing                                                                                        |
| 886 | Zkscan1        | NM_133906  | chr5  | 138526312 | 138549050 | BC052441 | zinc finger with KRAB and SCAN domains 1                                                                                   |
| 887 | Znf1           | NM_027318  | chr5  | 137458668 | 137463752 | BC026751 | zinc finger, H1Y domain containing 1                                                                                       |



| Table S2      |     | Alpha   | 0.05   | AlphaNonu | 0.03948  | Alphasuad | 0.03948 |        |         |         |        |         |        |        |         |        |         |    |         |        |  |  |  |
|---------------|-----|---------|--------|-----------|----------|-----------|---------|--------|---------|---------|--------|---------|--------|--------|---------|--------|---------|----|---------|--------|--|--|--|
| Gene Symbol   | Tau | Anova   | pAnova | R2Anova   | TotSSuCW | ReSSuCW   | R2CW    | Conat  | Sin1    | Cost    | Rsq1   | Fstat1  | p1     | Sin2   | Cost2   | Rsq2   | Fstat2  | p2 | ofstat2 | dp2    |  |  |  |
| 061007021R0k  | 25  | 1.27    | 0.3248 | 0.3872    | 0.002    | 0.0018    | 0.118   | 0.9802 | 0.0039  | -0.0013 | 0.1018 | 1.1902  | 0.3239 |        |         |        |         |    |         |        |  |  |  |
| 061007021R1k  | 25  | 2.8551  | 0.6501 | 0.5679    | 0.0179   | 0.0131    | 0.266   | 0.9338 | -0.0028 | -0.0196 | 0.2866 | 3.8043  | 0.0289 |        |         |        |         |    |         |        |  |  |  |
| 061007021R2k  | 23  | 1.7463  | 0.4446 | 0.5185    | 0.0047   | 0.0044    | 0.1513  | 0.9796 | -0.0019 | -0.0074 | 0.1517 | 1.9179  | 0.1749 |        |         |        |         |    |         |        |  |  |  |
| 091000109R0k  | 23  | 0.2764  | 0.9543 | 0.1079    | 0.0064   | 0.0064    | 0.0018  | 0.9741 | -0.001  | -0.0002 | 0.0018 | 0.0193  | 0.9809 |        |         |        |         |    |         |        |  |  |  |
| 111000814R0k  | 23  | 1.1015  | 0.4079 | 0.3282    | 0.0066   | 0.0059    | 0.1106  | 0.9638 | -0.0027 | -0.0072 | 0.1106 | 1.306   | 0.292  |        |         |        |         |    |         |        |  |  |  |
| 111003015R0k  | 23  | 1.183   | 0.3656 | 0.3411    | 0.0105   | 0.0101    | 0.1032  | 0.9625 | -0.0014 | -0.0056 | 0.0382 | 0.4168  | 0.6645 |        |         |        |         |    |         |        |  |  |  |
| 1110038017R0k | 23  | 7.2212  | 0.0005 | 0.7596    | 0.0083   | 0.0021    | 0.7432  | 0.9708 | -0.0046 | 0.0205  | 0.1818 | 16.885  | 0      | 0.0076 | -0.0053 | 0.7452 | 13.8936 | 0  | 4.7446  | 0.0213 |  |  |  |
| 160002020R0k  | 24  | 3.2713  | 0.0235 | 0.5887    | 0.0084   | 0.0043    | 0.4845  | 0.9996 | -0.0096 | -0.0162 | 0.4845 | 9.8994  | 0.01   |        |         |        |         |    |         |        |  |  |  |
| 170002302R0k  | 24  | 8.8919  | 0.0002 | 0.7955    | 0.0176   | 0.005     | 0.718   | 0.9739 | 0.0314  | -0.0079 | 0.18   | 28.7366 | 0      |        |         |        |         |    |         |        |  |  |  |
| 170012302R0k  | 25  | 1.6318  | 0.0068 | 0.5572    | 0.0059   | 0.0028    | 0.7075  | 0.9767 | -0.0062 | -0.0049 | 0.5765 | 1.8865  | 0.0364 |        |         |        |         |    |         |        |  |  |  |
| 1810013124R0k | 23  | 0.0007  | 0.9753 | 0.0114    | 0.0042   | 0.0042    | 0.0003  | 0.9655 | 0.0189  | -0.019  | 0.5303 | 17.9624 | 0      |        |         |        |         |    |         |        |  |  |  |
| 181008305R0k  | 23  | 3.508   | 0.0178 | 0.6055    | 0.0068   | 0.003     | 0.5555  | 0.9714 | -0.0161 | -0.0064 | 0.5555 | 13.1204 | 0.0002 |        |         |        |         |    |         |        |  |  |  |
| 2010209012R0k | 25  | 1.3845  | 0.2175 | 0.3772    | 0.0057   | 0.0048    | 0.1505  | 0.9994 | 0.0075  | 0.0041  | 0.1505 | 1.8609  | 0.1803 |        |         |        |         |    |         |        |  |  |  |
| 2010209016R0k | 25  | 3.248   | 0.0163 | 0.5867    | 0.0061   | 0.0047    | 0.5867  | 0.9959 | -0.0094 | -0.0201 | 0.5867 | 10.9947 | 0.0086 |        |         |        |         |    |         |        |  |  |  |
| 2310016620R0k | 25  | 1.2715  | 0.3241 | 0.3574    | 0.0044   | 0.0034    | 0.2273  | 0.9685 | -0.0083 | -0.0032 | 0.2273 | 3.0886  | 0.0687 |        |         |        |         |    |         |        |  |  |  |
| 231003523R0k  | 25  | 3.1387  | 0.0275 | 0.5786    | 0.0164   | 0.0089    | 0.4184  | 0.9587 | 0.0166  | 0.0155  | 0.4184 | 7.5548  | 0.0034 |        |         |        |         |    |         |        |  |  |  |
| 2310037013R0k | 23  | 6.8033  | 0.0008 | 0.7488    | 0.0081   | 0.0027    | 0.7324  | 0.9871 | 0.013   | -0.0134 | 0.5319 | 11.9324 | 0.0033 |        |         |        |         |    |         |        |  |  |  |
| 2310047013R0k | 23  | 1.2739  | 0.3231 | 0.3579    | 0.0027   | 0.0017    | 0.1604  | 0.9856 | -0.0032 | 0.004   | 0.1604 | 2.006   | 0.1595 |        |         |        |         |    |         |        |  |  |  |
| 2410002022R0k | 23  | 0.9076  | 0.5249 | 0.2842    | 0.0079   | 0.0072    | 0.0816  | 0.9882 | -0.0066 | -0.0036 | 0.0816 | 0.9331  | 0.409  |        |         |        |         |    |         |        |  |  |  |
| 2510002024R0k | 23  | 2.2333  | 0.0869 | 0.4443    | 0.0125   | 0.0101    | 0.4383  | 0.985  | 0.0216  | -0.0002 | 0.4383 | 8.1945  | 0.0023 |        |         |        |         |    |         |        |  |  |  |
| 261010110R0k  | 25  | 1.271   | 0.3244 | 0.3573    | 0.0063   | 0.0079    | 0.0428  | 0.9851 | -0.0003 | -0.001  | 0.0428 | 0.4691  | 0.632  |        |         |        |         |    |         |        |  |  |  |
| 2610507811R0k | 23  | 0.4447  | 0.8595 | 0.1629    | 0.0021   | 0.0021    | 0.0342  | 0.9785 | -0.0003 | -0.0024 | 0.0342 | 0.3718  | 0.894  |        |         |        |         |    |         |        |  |  |  |
| 261050802R0k  | 24  | 4.4776  | 0.0062 | 0.692     | 0.0064   | 0.0032    | 0.6161  | 0.9718 | -0.0071 | -0.0149 | 0.6161 | 9.9955  | 0.0051 |        |         |        |         |    |         |        |  |  |  |
| 483342509R0k  | 24  | 2.8959  | 0.0373 | 0.5584    | 0.0087   | 0.0046    | 0.4654  | 0.989  | 0.0175  | -0.006  | 0.4654 | 9.1424  | 0.0014 |        |         |        |         |    |         |        |  |  |  |
| 483343619R0k  | 25  | 12.2888 | 0      | 0.843     | 0.0139   | 0.0024    | 0.824   | 0.9579 | -0.0281 | -0.0112 | 0.824  | 49.1448 | 0      |        |         |        |         |    |         |        |  |  |  |
| 483343619R0k  | 25  | 5.5512  | 0.0022 | 0.7083    | 0.0058   | 0.0022    | 0.6227  | 0.9736 | 0.0128  | 0.0111  | 0.6227 | 17.3265 | 0      |        |         |        |         |    |         |        |  |  |  |
| 483343619R0k  | 25  | 1.007   | 0.624  | 0.2077    | 0.0054   | 0.0054    | 0.0003  | 0.9724 | -0.0061 | -0.0122 | 0.4664 | 1.905   | 0.0045 |        |         |        |         |    |         |        |  |  |  |
| 543040710R0k  | 24  | 9.0887  | 0.0001 | 0.7991    | 0.0208   | 0.0083    | 0.7437  | 0.9548 | -0.0303 | -0.0219 | 0.6395 | 18.624  | 0      | 0.0133 | -0.0019 | 0.7437 | 13.7842 | 0  | 3.8642  | 0.0391 |  |  |  |
| 633040604R0k  | 23  | 3.121   | 0.0252 | 0.5842    | 0.0054   | 0.0017    | 0.4898  | 0.9818 | -0.0039 | 0.0108  | 0.4898 | 10.0763 | 0.0009 |        |         |        |         |    |         |        |  |  |  |
| 633040710R0k  | 23  | 1.0338  | 0.4946 | 0.1784    | 0.0046   | 0.0046    | 0.0003  | 0.9818 | 0.0137  | 0.0187  | 0.4946 | 3.1667  | 0.01   |        |         |        |         |    |         |        |  |  |  |
| 613001115R0k  | 23  | 3.7681  | 0.013  | 0.5237    | 0.0042   | 0.0021    | 0.5094  | 0.9752 | 0.0116  | -0.0067 | 0.5094 | 10.9028 | 0.0008 |        |         |        |         |    |         |        |  |  |  |
| 953003802R0k  | 23  | 13.8993 | 0      | 0.8585    | 0.0125   | 0.0023    | 0.8179  | 0.9687 | -0.0282 | -0.0088 | 0.8179 | 47.1527 | 0      |        |         |        |         |    |         |        |  |  |  |
| 953003802R0k  | 23  | 3.892   | 0.0169 | 0.6863    | 0.0049   | 0.0003    | 0.6863  | 0.9902 | -0.0004 | -0.0044 | 0.6863 | 21.5443 | 0.0223 |        |         |        |         |    |         |        |  |  |  |
| A230067021R0k | 23  | 4.4936  | 0.0061 | 0.6628    | 0.0028   | 0.0009    | 0.6585  | 0.9739 | 0.0169  | -0.0219 | 0.6585 | 16.3207 | 0.0001 |        |         |        |         |    |         |        |  |  |  |
| A43005014R0k  | 23  | 1.356   | 0.2189 | 0.405     | 0.0034   | 0.0033    | 0.015   | 0.9754 | 0       | 0.0021  | 0.015  | 0.1596  | 0.8338 |        |         |        |         |    |         |        |  |  |  |
| A530082011R0k | 23  | 0.9007  | 0.0071 | 0.5857    | 0.004    | 0.0029    | 0.5973  | 0.9715 | 0.0141  | -0.0144 | 0.5973 | 13.1804 | 0.0004 |        |         |        |         |    |         |        |  |  |  |
| Abc1          | 23  | 12.9235 | 0      | 0.8459    | 0.0041   | 0.0009    | 0.7919  | 0.9703 | -0.0269 | -0.0135 | 0.8459 | 18.9521 | 0      | 0.0037 | -0.0004 | 0.7919 | 18.9222 | 0  | 7.4218  | 0.0042 |  |  |  |
| Abc1          | 23  | 5.6275  | 0.0023 | 0.7075    | 0.0048   | 0.0017    | 0.6401  | 0.9733 | -0.0163 | -0.0003 | 0.6401 | 18.675  | 0      |        |         |        |         |    |         |        |  |  |  |
| Abc1          | 23  | 2.2212  | 0.0883 | 0.4928    | 0.0075   | 0.0049    | 0.3493  | 0.9707 | -0.0172 | -0.0099 | 0.3493 | 5.6374  | 0.011  |        |         |        |         |    |         |        |  |  |  |
| Abc2          | 23  | 2.8642  | 0.0098 | 0.6443    | 0.0008   | 0.0003    | 0.6393  | 0.9902 | -0.0034 | -0.0044 | 0.6393 | 8.2304  | 0.0002 |        |         |        |         |    |         |        |  |  |  |
| Abd1          | 23  | 3.5772  | 0.0165 | 0.6101    | 0.004    | 0.0017    | 0.5849  | 0.9848 | 0.0136  | -0.0023 | 0.5849 | 15.6302 | 0.0002 |        |         |        |         |    |         |        |  |  |  |
| Abd1          | 25  | 5.4841  | 0.0023 | 0.7598    | 0.0078   | 0.0026    | 0.664   | 0.9882 | 0.0203  | -0.0037 | 0.664  | 20.7478 | 0      | 0.0217 | -0.0197 | 0.8832 | 38.7407 | 0  | 14.7374 | 0.0001 |  |  |  |
| Abd2          | 23  | 1.1641  | 0.492  | 0.1848    | 0.0038   | 0.0038    | 0.0003  | 0.9858 | 0.0136  | 0.0136  | 0.492  | 3.276   | 0.0068 |        |         |        |         |    |         |        |  |  |  |
| Acad          | 25  | 2.0926  | 0.1049 | 0.478     | 0.0052   | 0.0036    | 0.3026  | 0.9894 | 0.0102  | 0.0045  | 0.3026 | 5.5511  | 0.0227 |        |         |        |         |    |         |        |  |  |  |
| Ac5           | 25  | 8.4834  | 0.0002 | 0.7878    | 0.019    | 0.0044    | 0.7693  | 0.9532 | -0.0224 | -0.0223 | 0.6548 | 19.978  | 0      | 0.0078 | -0.0114 | 0.7693 | 15.8385 | 0  | 4.714   | 0.0218 |  |  |  |
| Ac9           | 23  | 1.8854  | 0.156  | 0.4891    | 0.0059   | 0.0059    | 0.0006  | 0.9766 | 0.0174  | -0.0169 | 0.4891 | 3.2462  | 0.0001 |        |         |        |         |    |         |        |  |  |  |
| Ac82          | 23  | 12.9864 | 0      | 0.841     | 0.0275   | 0.0075    | 0.8496  | 0.9375 | 0.0131  | 0.0314  | 0.8496 | 19.4628 | 0      |        |         |        |         |    |         |        |  |  |  |
| Ac84          | 24  | 4.0837  | 0.0096 | 0.64      | 0.014    | 0.0055    | 0.6599  | 0.9633 | 0.0203  | -0.0178 | 0.6599 | 16.4154 | 0.0001 |        |         |        |         |    |         |        |  |  |  |
| Actp1b        | 23  | 3.571   | 0.0148 | 0.6122    | 0.0076   | 0.0031    | 0.5898  | 0.9862 | 0.0147  | -0.0063 | 0.5898 | 14.2222 | 0.0045 |        |         |        |         |    |         |        |  |  |  |
| Actp1b        | 23  | 3.571   | 0.0148 | 0.6122    | 0.0076   | 0.0031    | 0.5898  | 0.9862 | 0.0147  | -0.0063 | 0.5898 | 14.2222 | 0.0045 |        |         |        |         |    |         |        |  |  |  |
| Actp1b        | 23  | 3.571   | 0.0148 | 0.6122    | 0.0076   | 0.0031    | 0.5898  | 0.9862 | 0.0147  | -0.0063 | 0.5898 | 14.2222 | 0.0045 |        |         |        |         |    |         |        |  |  |  |
| Actp1b        | 23  | 3.571   | 0.0148 | 0.6122    | 0.0076   | 0.0031    | 0.5898  | 0.9862 | 0.0147  | -0.0063 | 0.5898 | 14.2222 | 0.0045 |        |         |        |         |    |         |        |  |  |  |
| Actp1b        | 23  | 3.571   | 0.0148 | 0.6122    | 0.0076   | 0.0031    | 0.5898  | 0.9862 | 0.0147  | -0.0063 | 0.5898 | 14.2222 | 0.0045 |        |         |        |         |    |         |        |  |  |  |
| Actp1b        | 23  | 3.571   | 0.0148 | 0.6122    | 0.0076   | 0.0031    | 0.5898  | 0.9862 | 0.0147  | -0.0063 | 0.5898 | 14.2222 | 0.0045 |        |         |        |         |    |         |        |  |  |  |
| Actp1b        | 23  | 3.571   | 0.0148 | 0.6122    | 0.0076   | 0.0031    | 0.5898  | 0.9862 | 0.0147  | -0.0063 | 0.5898 | 14.2222 | 0.0045 |        |         |        |         |    |         |        |  |  |  |
| Actp1b        | 23  | 3.571   | 0.0148 | 0.6122    | 0.0076   | 0.0031    | 0.5898  | 0.9862 | 0.0147  | -0.0063 | 0.5898 | 14.2222 | 0.0045 |        |         |        |         |    |         |        |  |  |  |
| Actp1b        | 23  | 3.571   | 0.0148 | 0.6122    | 0.0076   | 0.0031    | 0.5898  | 0.9862 | 0.0147  | -0.0063 | 0.5898 | 14.2222 | 0.0045 |        |         |        |         |    |         |        |  |  |  |
| Actp1b        | 23  | 3.571   | 0.0148 | 0.6122    | 0.0076   | 0.0031    | 0.5898  | 0.9862 | 0.0147  | -0.0063 | 0.5898 | 14.2222 | 0.0045 |        |         |        |         |    |         |        |  |  |  |
| Actp1b        | 23  | 3.571   | 0.0148 | 0.6122    | 0.0076   | 0.0031    | 0.5898  | 0.9862 | 0.0147  | -0.0063 | 0.5898 | 14.2222 | 0.0045 |        |         |        |         |    |         |        |  |  |  |
| Actp1b        | 23  | 3.571   | 0.0148 | 0.6122    | 0.0076   | 0.0031    | 0.5898  | 0.9862 | 0.0147  | -0.0063 | 0.5898 | 14.2222 | 0.0045 |        |         |        |         |    |         |        |  |  |  |
| Actp1b        | 23  | 3.571   | 0.0148 | 0.6122    | 0.0076   | 0.0031    | 0.5898  | 0.9862 | 0.0147  | -0.0063 | 0.5898 | 14.2222 | 0.0045 |        |         |        |         |    |         |        |  |  |  |
| Actp1b        | 23  | 3.571   | 0.0148 | 0.6122    | 0.0076   | 0.0031    | 0.5898  | 0.9862 | 0.0147  | -0.0063 | 0.5898 | 14.2222 | 0.0045 |        |         |        |         |    |         |        |  |  |  |
| Actp1b        | 23  | 3.571   | 0.0148 | 0.6122    | 0.0076   | 0.0031    | 0.5898  | 0.9862 | 0.0147  | -0.0063 | 0.5898 | 14.2222 | 0.0045 |        |         |        |         |    |         |        |  |  |  |
| Actp1b        | 23  | 3.571   | 0.0148 | 0.6122    | 0.0      |           |         |        |         |         |        |         |        |        |         |        |         |    |         |        |  |  |  |

|        |      |         |        |        |        |        |        |         |         |         |        |         |        |
|--------|------|---------|--------|--------|--------|--------|--------|---------|---------|---------|--------|---------|--------|
| Commd7 | 23   | 10.3653 | 0.0001 | 0.8193 | 0.0194 | 0.0041 | 0.7913 | 0.9476  | 0.0077  | 0.0346  | 0.7913 | 38.809  | 0      |
| Cr     | 25   | 1.6246  | 0.1666 | 0.4991 | 0.0115 | 0.0115 | 0.3582 | 0.6442  | 0.002   | -0.0167 | 0.2358 | 3.398   | 0.0537 |
| Crpb2  | 23   | 3.4926  | 0.02   | 0.5986 | 0.0105 | 0.0109 | 0.3372 | 0.9324  | 0.0212  | 0.0062  | 0.3372 | 5.3426  | 0.0133 |
| Crpb3  | 23   | 2.8164  | 0.0409 | 0.552  | 0.0153 | 0.0094 | 0.3862 | 0.958   | 0.0018  | -0.0217 | 0.3862 | 6.8053  | 0.006  |
| Crpb4  | 23   | 0.6665  | 0.5262 | 0.3537 | 0.0023 | 0.002  | 0.298  | 0.9155  | -0.0002 | 0.008   | 0.298  | 1.504   | 0.2408 |
| Crpb5  | 23   | 0.7924  | 0.1729 | 0.5286 | 0.0285 | 0.0023 | 0.114  | 0.9517  | 0.0214  | -0.004  | 0.3114 | 10.783  | 0      |
| Crpb6  | 23   | 1.5941  | 0.2077 | 0.4109 | 0.0097 | 0.0093 | 0.0394 | 0.9624  | 0.0054  | -0.0018 | 0.0394 | 4.431   | 0.6556 |
| Crpb7  | 23   | 2.8957  | 0.0371 | 0.5889 | 0.0119 | 0.0062 | 0.4766 | 0.9642  | 0.0172  | 0.0178  | 0.4766 | 9.5606  | 0.0011 |
| Crpb8  | 23   | 0.0862  | 0.1128 | 0.4768 | 0.0019 | 0.0019 | 0.3581 | 0.715   | 0.0152  | 0.0154  | 0.2864 | 2.2138  | 0.0289 |
| Crp2   | 23.8 | 24.9237 | 0      | 0.916  | 0.0403 | 0.0039 | 0.9029 | 0.5435  | 0.0006  | 0.0526  | 0.82   | 47.837  | 0      |
| Crp3   | 24   | 27.3051 | 0      | 0.9228 | 0.0191 | 0.0015 | 0.919  | 0.5853  | 0.0302  | 0.0218  | 0.8869 | 69.7916 | 0      |
| Crp4   | 23   | 0.2365  | 0.003  | 0.6058 | 0.001  | 0.001  | 0.4964 | 0.9141  | 0.001   | -0.0001 | 0.4964 | 0.9537  | 0      |
| Crp5   | 23   | 1.2095  | 0.3527 | 0.3461 | 0.0076 | 0.0059 | 0.2267 | 0.9744  | -0.0083 | -0.0102 | 0.2267 | 3.0789  | 0.0672 |
| Crp6   | 23.2 | 4.2103  | 0.0082 | 0.5481 | 0.0015 | 0.0008 | 0.4486 | 0.9839  | 0.006   | 0.0047  | 0.4486 | 8.5428  | 0.0019 |
| Crp7   | 23   | 1.5766  | 0.2127 | 0.4729 | 0.0028 | 0.0028 | 0.5989 | 0.709   | 0.0071  | -0.0072 | 0.5989 | 8.2069  | 0.0974 |
| Crp8   | 23   | 0.0044  | 0.6795 | 0.0087 | 0.0098 | 0.0043 | 0.4413 | 0.9631  | 0.0094  | 0.0154  | 0.4413 | 8.265   | 0.0062 |
| Crp9   | 23   | 5.0313  | 0.0036 | 0.6876 | 0.0069 | 0.0025 | 0.633  | 0.9592  | 0.0176  | 0.0084  | 0.633  | 18.1138 | 0      |
| Crp10  | 23   | 1.4989  | 0.2376 | 0.3957 | 0.0055 | 0.0046 | 0.1588 | 0.963   | -0.0077 | -0.0042 | 0.1588 | 1.9834  | 0.1625 |
| Crp11  | 23   | 0.0411  | 0.1033 | 0.4783 | 0.0019 | 0.0019 | 0.359  | 0.9595  | -0.0001 | -0.0047 | 0.359  | 4.1     | 0.2238 |
| Crp12  | 24.4 | 6.5015  | 0.001  | 0.7398 | 0.0029 | 0.0009 | 0.6758 | 0.9783  | 0.0124  | 0.0027  | 0.6758 | 21.8665 | 0      |
| Crp13  | 23   | 1.5598  | 0.2178 | 0.4056 | 0.003  | 0.0022 | 0.2715 | 0.9703  | 0.0064  | -0.0055 | 0.2715 | 3.9125  | 0.036  |
| Crp14  | 23   | 5.9761  | 0.002  | 0.7129 | 0.0017 | 0.0004 | 0.4005 | 0.988   | 0.0029  | -0.0071 | 0.4005 | 8.2565  | 0.0023 |
| Crp15  | 23   | 1.8681  | 0.1423 | 0.4497 | 0.0048 | 0.0034 | 0.2983 | 0.9677  | 0.0096  | 0.0048  | 0.2983 | 4.4834  | 0.0442 |
| Crp16  | 23   | 1.7052  | 0.1781 | 0.4273 | 0.0057 | 0.0041 | 0.2799 | 0.9692  | 0.005   | 0.0107  | 0.2799 | 4.0838  | 0.0318 |
| Crp17  | 23   | 3.0007  | 0.0266 | 0.5854 | 0.0042 | 0.0032 | 0.2447 | 0.97    | -0.0051 | -0.0078 | 0.2447 | 3.4015  | 0.0525 |
| Crp18  | 23   | 4.2104  | 0.0082 | 0.5481 | 0.0061 | 0.0036 | 0.4015 | 0.9691  | 0.0128  | 0.0069  | 0.4015 | 7.0433  | 0.0048 |
| Crp19  | 23   | 0.4852  | 0.8316 | 0.1751 | 0.0382 | 0.0331 | 0.1332 | 0.9272  | 0.0004  | -0.0209 | 0.1332 | 1.6138  | 0.2229 |
| Crp20  | 23   | 1.7988  | 0.1666 | 0.4991 | 0.0115 | 0.0115 | 0.3582 | 0.6442  | 0.002   | -0.0167 | 0.2358 | 3.398   | 0.0537 |
| Crp21  | 23   | 8.7417  | 0.0002 | 0.7327 | 0.0127 | 0.0041 | 0.6762 | 0.986   | 0.0226  | 0.0094  | 0.6762 | 22.2011 | 0      |
| Crp22  | 23   | 9.3039  | 0.0001 | 0.8028 | 0.0273 | 0.0062 | 0.773  | 0.955   | 0.0108  | 0.034   | 0.5749 | 14.1688 | 0.0001 |
| Crp23  | 23   | 1.9993  | 0.1236 | 0.4616 | 0.0085 | 0.0058 | 0.3648 | -0.0026 | 0.0152  | 0.3235  | 5.0209 | 0.0165  |        |
| Crp24  | 23   | 0.0002  | 0.9133 | 0.0019 | 0.0019 | 0.0019 | 0.2561 | 0.938   | 0.0128  | 0.0142  | 0.2561 | 3.9159  | 0.0441 |
| Crp25  | 23   | 1.4804  | 0.2431 | 0.3831 | 0.0027 | 0.0019 | 0.263  | 0.9778  | -0.0078 | -0.0026 | 0.263  | 4.3506  | 0.0283 |
| Crp26  | 23   | 0.4019  | 0.8874 | 0.1495 | 0.0054 | 0.0051 | 0.0435 | 0.9724  | 0.0032  | 0.0031  | 0.0435 | 0.4774  | 0.6289 |
| Crp27  | 23   | 0.1708  | 0.1608 | 0.4783 | 0.0019 | 0.0019 | 0.3581 | 0.715   | 0.0152  | 0.0154  | 0.2864 | 2.2138  | 0.0289 |
| Crp28  | 23   | 4.3139  | 0.0074 | 0.5537 | 0.0081 | 0.0031 | 0.4831 | 0.9722  | 0.0032  | -0.015  | 0.4831 | 9.814   | 0.001  |
| Crp29  | 23   | 5.1774  | 0.0031 | 0.6937 | 0.0248 | 0.0105 | 0.5796 | 0.9329  | -0.0297 | -0.019  | 0.5796 | 14.4149 | 0.0001 |
| Crp30  | 24   | 17.9019 | 0.001  | 0.9228 | 0.0191 | 0.0015 | 0.919  | 0.5853  | 0.0302  | 0.0218  | 0.8869 | 69.7916 | 0      |
| Crp31  | 23   | 1.3091  | 0.3079 | 0.3642 | 0.0101 | 0.0091 | 0.0928 | 0.9355  | -0.0038 | -0.0079 | 0.0928 | 1.0735  | 0.3989 |
| Crp32  | 24   | 2.3501  | 0.0744 | 0.5059 | 0.0034 | 0.0021 | 0.402  | 0.979   | -0.0061 | -0.0089 | 0.402  | 0.973   | 0.0048 |
| Crp33  | 23   | 0.1486  | 0.0021 | 0.7897 | 0.0019 | 0.0019 | 0.3581 | 0.715   | 0.0152  | 0.0154  | 0.2864 | 2.2138  | 0.0289 |
| Crp34  | 23   | 1.9789  | 0.1221 | 0.464  | 0.0069 | 0.0051 | 0.3741 | 0.9702  | 0.0114  | 0.0056  | 0.3741 | 5.2725  | 0.0013 |
| Crp35  | 23   | 0.5748  | 0.7863 | 0.2009 | 0.0031 | 0.0028 | 0.1156 | 0.9765  | 0.0025  | -0.0047 | 0.1156 | 1.3729  | 0.2752 |
| Crp36  | 23   | 1.173   | 0.3706 | 0.3391 | 0.0054 | 0.0041 | 0.2287 | 0.9715  | 0.0062  | 0.0055  | 0.2287 | 3.1124  | 0.0654 |
| Crp37  | 23   | 0.4768  | 0.0021 | 0.8142 | 0.0003 | 0.0004 | 0.803  | 0.8029  | 0.0051  | 0.1969  | 0.803  | 66.2811 | 0      |
| Crp38  | 23   | 4.7633  | 0.0047 | 0.6757 | 0.0041 | 0.0018 | 0.5847 | 0.9728  | 0.0136  | -0.003  | 0.5847 | 13.6217 | 0.0002 |
| Crp39  | 23   | 3.9716  | 0.0166 | 0.6998 | 0.0054 | 0.0035 | 0.3608 | 0.979   | 0.0126  | -0.0071 | 0.3608 | 5.9288  | 0.0091 |
| Crp40  | 23   | 0.8070  | 0.0144 | 0.4713 | 0.0052 | 0.0042 | 0.12   | 0.989   | -0.005  | 0.005   | 0.12   | 1.445   | 0.286  |
| Crp41  | 23   | 5.0054  | 0.0025 | 0.7028 | 0.0204 | 0.0072 | 0.6486 | 0.9369  | -0.0134 | -0.0241 | 0.6486 | 14.532  | 0.002  |
| Crp42  | 23   | 5.5187  | 0.0023 | 0.7071 | 0.0279 | 0.0112 | 0.5976 | 0.9382  | -0.0029 | -0.0022 | 0.5976 | 15.5929 | 0.0001 |
| Crp43  | 23   | 0.1486  | 0.0021 | 0.7897 | 0.0019 | 0.0019 | 0.3581 | 0.715   | 0.0152  | 0.0154  | 0.2864 | 2.2138  | 0.0289 |
| Crp44  | 24.2 | 6.8552  | 0.0007 | 0.7496 | 0.0232 | 0.0059 | 0.7014 | 0.9174  | -0.0235 | 0.0172  | 0.7014 | 24.6599 | 0      |
| Crp45  | 23   | 3.8152  | 0.0126 | 0.6253 | 0.009  | 0.0051 | 0.4379 | 0.9759  | 0.0141  | 0.018   | 0.4379 | 8.1808  | 0.0024 |
| Crp46  | 23   | 0.7772  | 0.1613 | 0.2537 | 0.0062 | 0.0057 | 0.0867 | 0.9694  | -0.0061 | -0.0029 | 0.0867 | 0.9969  | 0.3958 |
| Crp47  | 23   | 0.3361  | 0.5831 | 0.0521 | 0.0029 | 0.0029 | 0.244  | 0.9711  | 0.0029  | 0.0029  | 0.244  | 1.333   | 0.3958 |
| Crp48  | 23   | 14.9716 | 0      | 0.8662 | 0.02   | 0.0031 | 0.845  | 0.9458  | 0.0227  | -0.0238 | 0.845  | 20.5792 | 0      |
| Crp49  | 23   | 3.6533  | 0.0151 | 0.6151 | 0.0045 | 0.0022 | 0.5087 | 0.9715  | -0.0009 | -0.0135 | 0.5087 | 10.8796 | 0.0006 |
| Crp50  | 23   | 0.1390  | 0.0002 | 0.8491 | 0.0003 | 0.0003 | 0.8113 | 0.9712  | 0.0013  | 0.0142  | 0.8113 | 5.862   | 0.0161 |
| Crp51  | 23   | 1.3523  | 0.2901 | 0.3717 | 0.0035 | 0.0034 | 0.0377 | 0.9811  | 0.0033  | 0       | 0.0377 | 0.4118  | 0.8677 |
| Crp52  | 23   | 3.6577  | 0.015  | 0.6154 | 0.0032 | 0.0016 | 0.5081 | 0.9836  | -0.0006 | -0.0114 | 0.5081 | 10.8468 | 0.0006 |
| Crp53  | 23   | 0.8711  | 0.0028 | 0.8491 | 0.0003 | 0.0003 | 0.8067 | 0.9715  | 0.0001  | 0.0086  | 0.8067 | 16.187  | 0.0001 |
| Crp54  | 23   | 6.2485  | 0.0012 | 0.7322 | 0.0202 | 0.0086 | 0.5763 | 0.9512  | 0.0189  | -0.0257 | 0.5763 | 14.2835 | 0.0001 |
| Crp55  | 24   | 41.3889 | 0      | 0.9476 | 0.0199 | 0.0011 | 0.944  | 0.9871  | 0.0139  | 0.0386  | 0.9109 | 107.31  | 0      |
| Crp56  | 23   | 0.8491  | 0.0002 | 0.8491 | 0.0003 | 0.0003 | 0.8113 | 0.9712  | 0.0013  | 0.0142  | 0.8113 | 5.862   | 0.0161 |
| Crp57  | 23   | 14.4955 | 0      | 0.8638 | 0.0124 | 0.0021 | 0.8256 | 0.9626  | 0.0073  | -0.0241 | 0.8256 | 18.459  | 0      |
| Crp58  | 23   | 2.2444  | 0.0856 | 0.4855 | 0.0074 | 0.0057 | 0.2318 | 0.9771  | 0.0117  | 0.0009  | 0.2318 | 3.1675  | 0.0628 |
| Crp59  | 23   | 3.819   | 0.0125 | 0.6236 | 0.005  | 0.0042 | 0.1628 | 0.9783  | 0.0076  | 0.0037  | 0.1628 | 2.0419  | 0.1548 |
| Crp60  | 23   | 1.2631  | 0.0001 | 0.8291 | 0.0004 | 0.0004 | 0.7934 | 0.9809  | 0.0001  | 0.0001  | 0.7934 | 3.3769  | 0.0001 |
| Crp61  | 23   | 8.6233  | 0.0002 | 0.7885 | 0.0042 | 0.0011 | 0.7333 | 0.9689  | 0.0039  | -0.014  | 0.7333 | 16.6959 | 0      |
| Crp62  | 23   | 13.9264 | 0      | 0.859  | 0.0628 | 0.0129 | 0.7951 | 0.8008  | -0.0535 | -0.0229 | 0.6285 | 17.7631 | 0      |
| Crp63  | 23   | 10.016  | 0.0001 | 0.8142 | 0.0003 | 0.0004 | 0.7934 | 0.9809  | 0.0001  | 0.0001  | 0.7934 | 3.3769  | 0.0001 |
| Crp64  | 23   | 13.821  | 0      | 0.8591 | 0.0247 | 0.0044 | 0.8216 | 0.9344  | -0.0069 | 0.0397  | 0.8216 | 48.3596 | 0      |
| Crp65  | 23   | 4.4819  | 0.0062 | 0.6623 | 0.0125 | 0.0059 | 0.5479 | 0.9552  | 0.0236  | -0.002  | 0.5479 | 12.7496 | 0.0002 |
| Crp66  | 23   | 0.4891  | 0.0002 | 0.8491 | 0.0003 | 0.0003 | 0.8113 | 0.9712  | 0.0013  | 0.0142  | 0.8113 | 5.862   | 0.0161 |
| Crp67  | 23   | 0.4339  | 0.8667 | 0.1596 | 0.0038 | 0.0034 | 0.0977 | 0.9776  | -0.0037 | 0.004   | 0.0977 | 1.1374  | 0.3396 |
| Crp68  | 23   | 1.3196  | 0.3035 | 0.366  | 0.0066 | 0.0055 | 0.1681 | 0.9701  | 0.0041  | -0.0029 | 0.1681 | 2.1211  | 0.1449 |
| Crp69  | 23   | 2.4552  | 0.0017 | 0.5695 | 0.0056 | 0.0047 | 0.2757 | 0.969   | 0.005   | 0.0116  | 0.2757 | 3.6368  | 0.0041 |
| Crp70  | 23   | 0.9818  | 0.0266 | 0.3742 | 0.0136 | 0.0072 | 0.47   | 0.9475  | -0.0235 | 0.001   | 0.47   | 9.3126  | 0.0013 |
| Crp71  | 23   | 0.9211  | 0.0001 | 0.8012 | 0.0068 | 0.0014 | 0.7943 | 0.9728  | -0.0083 | 0.0098  | 0.3557 | 5.7959  | 0.0001 |
| Crp72  | 23   | 27.6168 | 0      | 0.9236 | 0.0245 | 0.0028 | 0.8927 | 0.973   | -0.0184 | -0.0384 | 0.8927 | 87.3923 | 0      |
| Crp73  | 23   | 0.6992  | 0.005  | 0.7897 | 0.0019 | 0.0019 | 0.3581 | 0.715   | 0.0152  | 0.0154  | 0.2864 | 2.2138  | 0.0289 |
| Crp74  | 23   | 1.7269  | 0.1728 | 0.4304 | 0.0024 | 0.0018 | 0.2437 | 0.9744  | -0.0005 | -0.0071 | 0.2437 | 3.3828  | 0.0533 |
| Crp75  | 23   | 2.2974  | 0.0798 |        |        |        |        |         |         |         |        |         |        |



|        |      |         |        |        |        |        |        |        |         |         |        |         |        |         |         |        |         |         |         |         |     |
|--------|------|---------|--------|--------|--------|--------|--------|--------|---------|---------|--------|---------|--------|---------|---------|--------|---------|---------|---------|---------|-----|
| Pfwr   | 25   | 3.5500  | 0.0174 | 0.8077 | 0.0145 | 0.0074 | 0.4914 | 0.9542 | 0.0049  | -0.0171 | 0.2668 | 8.2026  | 0.0385 | 0.0003  | 0.0158  | 0.4914 | 4.5892  | 0.0092  | 4.1953  | 0.0031  |     |
| Pfwr2  | 23   | 2.5799  | 0.0169 | 0.7469 | 0.0111 | 0.0071 | 0.4379 | 0.9161 | 0.0073  | -0.0116 | 0.2443 | 7.5425  | 0.0368 | 0.0003  | 0.0158  | 0.4914 | 4.5892  | 0.0092  | 4.1953  | 0.0031  |     |
| Pfwr3  | 23   | 2.7867  | 0.0423 | 0.5496 | 0.0079 | 0.0044 | 0.4443 | 0.9867 | 0.0174  | -0.0116 | 0.4443 | 8.5952  | 0.0021 | 0.0003  | 0.0158  | 0.4914 | 4.5892  | 0.0092  | 4.1953  | 0.0031  |     |
| Pfwr4  | 23   | 1.9799  | 0.2118 | 0.4087 | 0.0054 | 0.0044 | 0.1829 | 0.9699 | -0.0004 | -0.0089 | 0.1829 | 8.3503  | 0.0199 | 0.0003  | 0.0158  | 0.4914 | 4.5892  | 0.0092  | 4.1953  | 0.0031  |     |
| Pfwr5  | 23   | 2.5885  | 0.0163 | 0.8111 | 0.0074 | 0.0051 | 0.4515 | 0.9851 | 0.0021  | 0.0181  | 0.5511 | 8.0583  | 0.0018 | 0.0003  | 0.0158  | 0.4914 | 4.5892  | 0.0092  | 4.1953  | 0.0031  |     |
| Pfwr6  | 23   | 1.9836  | 0.3692 | 0.1774 | 0.0074 | 0.0051 | 0.3692 | 0.9891 | 0.0016  | 0.0178  | 0.2824 | 8.2441  | 0.0018 | 0.0003  | 0.0158  | 0.4914 | 4.5892  | 0.0092  | 4.1953  | 0.0031  |     |
| Pfwr7  | 23.6 | 7.6837  | 0.0004 | 0.7703 | 0.0065 | 0.0017 | 0.7448 | 0.9814 | -0.0059 | -0.0176 | 0.6403 | 18.6903 | 0.0003 | 0.0005  | 0.0222  | 0.9092 | 47.5499 | 0.0002  | 18.8504 | 0.0     |     |
| Pfwr8  | 23   | 3.6457  | 0.0152 | 0.8146 | 0.0067 | 0.0051 | 0.5427 | 0.9711 | -0.0077 | 0.0156  | 0.5427 | 12.4608 | 0.0003 | 0.0003  | 0.0222  | 0.9092 | 47.5499 | 0.0002  | 18.8504 | 0.0     |     |
| Pfwr9  | 23   | 1.7883  | 0.3265 | 0.1111 | 0.0074 | 0.0051 | 0.3265 | 0.9891 | 0.0016  | 0.0178  | 0.2824 | 8.2441  | 0.0018 | 0.0003  | 0.0158  | 0.4914 | 4.5892  | 0.0092  | 4.1953  | 0.0031  |     |
| Pfwr10 | 23   | 16.8812 | 0.0    | 0.8806 | 0.1491 | 0.0018 | 0.8755 | 0.8497 | -0.0112 | 0.0031  | 0.7195 | 26.9284 | 0.0003 | 0.0005  | 0.0222  | 0.9092 | 47.5499 | 0.0002  | 18.8504 | 0.0     |     |
| Pfwr11 | 23   | 0.7233  | 0.6848 | 0.2404 | 0.0046 | 0.0046 | 0.019  | 0.9788 | 0.0059  | 0.0025  | 0.019  | 0.2031  | 0.8178 | 0.0003  | 0.0003  | 0.0222 | 0.9092  | 47.5499 | 0.0002  | 18.8504 | 0.0 |
| Pfwr12 | 23   | 0.2831  | 0.0369 | 0.8884 | 0.0111 | 0.0051 | 0.8884 | 0.9069 | 0.0038  | 0.0178  | 0.0369 | 8.045   | 0.0003 | 0.0003  | 0.0222  | 0.9092 | 47.5499 | 0.0002  | 18.8504 | 0.0     |     |
| Pfwr13 | 23   | 2.8574  | 0.05   | 0.5376 | 0.0085 | 0.0047 | 0.4512 | 0.961  | -0.0023 | -0.0175 | 0.4512 | 8.6341  | 0.0018 | 0.0003  | 0.0222  | 0.9092 | 47.5499 | 0.0002  | 18.8504 | 0.0     |     |
| Pfwr14 | 23   | 4.9808  | 0.0038 | 0.9534 | 0.0103 | 0.0034 | 0.8999 | 0.9534 | 0.018   | 0.0106  | 0.9534 | 11.6651 | 0.0004 | -0.0038 | -0.0101 | 0.8699 | 9.6395  | 0.0002  | 4.1343  | 0.0323  |     |
| Pfwr15 | 24.7 | 3.2601  | 0.0271 | 0.6281 | 0.0078 | 0.0104 | 0.6281 | 0.9851 | 0.02    | 0.0239  | 0.6281 | 7.7663  | 0.0004 | 0.0003  | 0.0222  | 0.9092 | 47.5499 | 0.0002  | 18.8504 | 0.0     |     |
| Pfwr16 | 23   | 0.5713  | 0.7886 | 0.2    | 0.0063 | 0.0054 | 0.1402 | 0.9629 | 0.0094  | 0.0003  | 0.1402 | 1.7118  | 0.0048 | 0.0003  | 0.0222  | 0.9092 | 47.5499 | 0.0002  | 18.8504 | 0.0     |     |
| Pfwr17 | 23   | 2.1132  | 0.102  | 0.4804 | 0.0076 | 0.0045 | 0.4122 | 0.9646 | -0.0085 | -0.0138 | 0.4122 | 7.9645  | 0.0038 | 0.0003  | 0.0222  | 0.9092 | 47.5499 | 0.0002  | 18.8504 | 0.0     |     |
| Pfwr18 | 23   | 19.8789 | 0.0    | 0.8969 | 0.1417 | 0.0281 | 0.8019 | 0.8213 | -0.0388 | -0.0811 | 0.6445 | 18.0331 | 0.0003 | -0.018  | 0.038   | 0.8019 | 19.2228 | 0.0002  | 7.5462  | 0.0039  |     |
| Pfwr19 | 23   | 1.9223  | 0.0297 | 0.8969 | 0.007  | 0.0058 | 0.9361 | 0.0404 | -0.0184 | 0.0368  | 0.9361 | 8.7219  | 0.0003 | 0.0003  | 0.0222  | 0.9092 | 47.5499 | 0.0002  | 18.8504 | 0.0     |     |
| Pfwr20 | 23   | 2.4471  | 0.0655 | 0.8715 | 0.0183 | 0.0091 | 0.4062 | 0.9497 | 0.0223  | 0.0022  | 0.4062 | 7.1836  | 0.0042 | 0.0003  | 0.0222  | 0.9092 | 47.5499 | 0.0002  | 18.8504 | 0.0     |     |
| Pfwr21 | 23   | 3.5793  | 0.0164 | 0.6103 | 0.0071 | 0.0035 | 0.5135 | 0.9634 | 0.0069  | 0.016   | 0.5135 | 11.9823 | 0.0005 | 0.0003  | 0.0222  | 0.9092 | 47.5499 | 0.0002  | 18.8504 | 0.0     |     |
| Pfwr22 | 23   | 1.3918  | 0.2747 | 0.3768 | 0.0057 | 0.0047 | 0.1715 | 0.9719 | 0.0078  | -0.0048 | 0.1715 | 2.3731  | 0.1388 | 0.0003  | 0.0222  | 0.9092 | 47.5499 | 0.0002  | 18.8504 | 0.0     |     |
| Pfwr23 | 23   | 3.631   | 0.0155 | 0.6137 | 0.0234 | 0.0149 | 0.3844 | 0.9376 | -0.0216 | -0.0164 | 0.3844 | 6.0193  | 0.0685 | 0.0003  | 0.0222  | 0.9092 | 47.5499 | 0.0002  | 18.8504 | 0.0     |     |
| Pfwr24 | 23   | 15.8051 | 0.0    | 0.8737 | 0.0469 | 0.0073 | 0.844  | 0.9259 | 0.0551  | -0.0071 | 0.844  | 33.5193 | 0.0003 | -0.0067 | -0.017  | 0.844  | 25.7082 | 0.0002  | 5.086   | 0.017   |     |
| Pfwr25 | 23   | 3.1121  | 0.0284 | 0.5766 | 0.0226 | 0.0135 | 0.4349 | 0.9241 | 0.0099  | -0.0269 | 0.4349 | 8.062   | 0.0023 | 0.0003  | 0.0222  | 0.9092 | 47.5499 | 0.0002  | 18.8504 | 0.0     |     |
| Pfwr26 | 23   | 2.267   | 0.0831 | 0.4879 | 0.0015 | 0.0013 | 0.1432 | 0.9813 | 0.0017  | 0.0038  | 0.1432 | 7.954   | 0.1973 | 0.0003  | 0.0222  | 0.9092 | 47.5499 | 0.0002  | 18.8504 | 0.0     |     |
| Pfwr27 | 23   | 20.1619 | 0.0    | 0.8693 | 0.0283 | 0.0122 | 0.8693 | 0.9104 | -0.0431 | 0.0271  | 0.8693 | 7.6217  | 0.0003 | 0.0003  | 0.0222  | 0.9092 | 47.5499 | 0.0002  | 18.8504 | 0.0     |     |
| Pfwr28 | 24.6 | 5.227   | 0.0004 | 0.767  | 0.0138 | 0.0037 | 0.7513 | 0.9547 | 0.0137  | 0.0254  | 0.7513 | 28.58   | 0.0003 | 0.0003  | 0.0222  | 0.9092 | 47.5499 | 0.0002  | 18.8504 | 0.0     |     |
| Pfwr29 | 23   | 2.9455  | 0.0348 | 0.5831 | 0.0095 | 0.0047 | 0.5084 | 0.9594 | 0.0047  | -0.0191 | 0.5084 | 10.8587 | 0.0006 | 0.0003  | 0.0222  | 0.9092 | 47.5499 | 0.0002  | 18.8504 | 0.0     |     |
| Pfwr30 | 23   | 3.7287  | 0.0139 | 0.82   | 0.0047 | 0.0022 | 0.5395 | 0.9719 | -0.0079 | -0.0123 | 0.5395 | 12.3014 | 0.0003 | 0.0003  | 0.0222  | 0.9092 | 47.5499 | 0.0002  | 18.8504 | 0.0     |     |
| Pfwr31 | 23   | 0.8486  | 0.0222 | 0.119  | 0.0071 | 0.0047 | 0.4349 | 0.9241 | 0.0094  | 0.0164  | 0.4349 | 8.062   | 0.0003 | 0.0003  | 0.0222  | 0.9092 | 47.5499 | 0.0002  | 18.8504 | 0.0     |     |
| Pfwr32 | 23   | 40.7472 | 0.0    | 0.9469 | 0.0613 | 0.0037 | 0.9403 | 0.94   | -0.0063 | 0.0666  | 0.8685 | 69.3303 | 0.0003 | 0.0048  | -0.0181 | 0.9403 | 74.8241 | 0.0002  | 11.4326 | 0.0006  |     |
| Pfwr33 | 23   | 22.5775 | 0.0    | 0.9681 | 0.0277 | 0.0027 | 0.9039 | 0.9406 | 0.0322  | -0.0309 | 0.8632 | 66.2748 | 0.0003 | -0.0089 | 0.0015  | 0.9039 | 44.6687 | 0.0002  | 4.0174  | 0.0351  |     |
| Pfwr34 | 23   | 2.8875  | 0.012  | 0.7133 | 0.0067 | 0.0051 | 0.4331 | 0.9634 | 0.0017  | 0.0038  | 0.4331 | 8.062   | 0.0003 | 0.0003  | 0.0222  | 0.9092 | 47.5499 | 0.0002  | 18.8504 | 0.0     |     |
| Pfwr35 | 23   | 2.795   | 0.042  | 0.5501 | 0.0081 | 0.0035 | 0.4215 | 0.9776 | -0.0047 | 0.0135  | 0.4215 | 7.6515  | 0.0032 | 0.0003  | 0.0222  | 0.9092 | 47.5499 | 0.0002  | 18.8504 | 0.0     |     |
| Pfwr36 | 23   | 16.6787 | 0.0    | 0.8795 | 0.0215 | 0.0037 | 0.8294 | 0.9444 | 0.0204  | -0.0327 | 0.8294 | 51.5866 | 0.0003 | -0.0143 | -0.0071 | 0.8294 | 17.5413 | 0.0002  | 7.6464  | 0.0037  |     |
| Pfwr37 | 23   | 0.8003  | 0.0007 | 0.6103 | 0.0008 | 0.0008 | 0.6103 | 0.9223 | 0.0007  | 0.0007  | 0.6103 | 17.1717 | 0.0003 | 0.0003  | 0.0222  | 0.9092 | 47.5499 | 0.0002  | 18.8504 | 0.0     |     |
| Pfwr38 | 23   | 1.7842  | 0.1597 | 0.4394 | 0.0029 | 0.0027 | 0.3198 | 0.982  | -0.0022 | 0.0084  | 0.3198 | 4.8374  | 0.0176 | 0.0003  | 0.0222  | 0.9092 | 47.5499 | 0.0002  | 18.8504 | 0.0     |     |
| Pfwr39 | 23   | 4.08    | 0.0094 | 0.6409 | 0.0184 | 0.0095 | 0.5084 | 0.9647 | 0.0284  | -0.0081 | 0.5084 | 10.8589 | 0.0006 | 0.0003  | 0.0222  | 0.9092 | 47.5499 | 0.0002  | 18.8504 | 0.0     |     |
| Pfwr40 | 23   | 4.2801  | 0.0157 | 0.6564 | 0.0053 | 0.0057 | 0.357  | 0.9728 | 0.0019  | 0.0102  | 0.357  | 8.6267  | 0.0007 | 0.0003  | 0.0222  | 0.9092 | 47.5499 | 0.0002  | 18.8504 | 0.0     |     |
| Pfwr41 | 23   | 1.1667  | 0.3735 | 0.3797 | 0.0168 | 0.0123 | 0.3568 | 0.9568 | -0.0196 | -0.009  | 0.3568 | 8.6267  | 0.0006 | 0.0003  | 0.0222  | 0.9092 | 47.5499 | 0.0002  | 18.8504 | 0.0     |     |
| Pfwr42 | 23.1 | 15.0824 | 0.0    | 0.8884 | 0.0688 | 0.0097 | 0.8551 | 0.9419 | -0.0066 | 0.0272  | 0.7958 | 40.9199 | 0.0003 | 0.0127  | 0.0136  | 0.8551 | 28.0233 | 0.0002  | 3.8847  | 0.0385  |     |
| Pfwr43 | 23   | 13.0996 | 0.0    | 0.8514 | 0.0027 | 0.0097 | 0.2812 | 0.9768 | 0.0108  | 0.0062  | 0.6599 | 20.2814 | 0.0003 | -0.0003 | -0.0047 | 0.7599 | 15.0345 | 0.0002  | 3.9976  | 0.0356  |     |
| Pfwr44 | 23   | 1.4423  | 0.2563 | 0.1989 | 0.0098 | 0.0058 | 0.1989 | 0.9717 | 0.0103  | 0.0103  | 0.1989 | 6.1634  | 0.1634 | 0.0003  | 0.0222  | 0.9092 | 47.5499 | 0.0002  | 18.8504 | 0.0     |     |
| Pfwr45 | 23   | 3.3868  | 0.0202 | 0.5979 | 0.0034 | 0.0016 | 0.5187 | 0.9752 | 0.0119  | 0.0009  | 0.5187 | 11.101  | 0.0005 | 0.0003  | 0.0222  | 0.9092 | 47.5499 | 0.0002  | 18.8504 | 0.0     |     |
| Pfwr46 | 23   | 4.8942  | 0.005  | 0.6725 | 0.0069 | 0.0052 | 0.5348 | 0.9663 | 0.0145  | -0.0105 | 0.5348 | 12.072  | 0.0003 | 0.0003  | 0.0222  | 0.9092 | 47.5499 | 0.0002  | 18.8504 | 0.0     |     |
| Pfwr47 | 23   | 3.316   | 0.0176 | 0.6258 | 0.0045 | 0.0045 | 0.328  | 0.9731 | 0.0091  | 0.0091  | 0.328  | 8.062   | 0.0003 | 0.0003  | 0.0222  | 0.9092 | 47.5499 | 0.0002  | 18.8504 | 0.0     |     |
| Pfwr48 | 23   | 2.9912  | 0.0705 | 0.5113 | 0.0118 | 0.0093 | 0.213  | 0.9513 | -0.0148 | 0.0002  | 0.213  | 2.8423  | 0.0808 | 0.0003  | 0.0222  | 0.9092 | 47.5499 | 0.0002  | 18.8504 | 0.0     |     |
| Pfwr49 | 23   | 2.5107  | 0.0603 | 0.5235 | 0.0091 | 0.008  | 0.1167 | 0.9729 | 0.0088  | 0.0027  | 0.1167 | 1.389   | 0.2718 | 0.0003  | 0.0222  | 0.9092 | 47.5499 | 0.0002  | 18.8504 | 0.0     |     |
| Pfwr50 | 23   | 0.      |        |        |        |        |        |        |         |         |        |         |        |         |         |        |         |         |         |         |     |



|         |      |         |        |        |        |        |        |        |         |         |        |         |        |         |         |        |         |        |        |        |
|---------|------|---------|--------|--------|--------|--------|--------|--------|---------|---------|--------|---------|--------|---------|---------|--------|---------|--------|--------|--------|
| Zip36   | 25   | 2.063   | 0.1092 | 0.4744 | 0.0276 | 0.0158 | 0.4272 | 0.9442 | 0.0309  | -0.0036 | 0.4272 | 7.8305  | 0.0029 |         |         |        |         |        |        |        |
| Zip361  | 24.9 | 3.302   | 0.0076 | 0.7214 | 0.0338 | 0.0111 | 0.7111 | 0.9381 | -0.2144 | 0.0382  | 0.5439 | 12.5277 | 0.0003 | 0.0256  | -0.0099 | 0.7111 | 11.6972 | 0.0001 | 5.4974 | 0.0131 |
| Zip518  | 23   | 3.4499  | 0.0191 | 0.6019 | 0.0294 | 0.0118 | 0.5969 | 0.9248 | -0.0177 | 0.0236  | 0.3228 | 5.0043  | 0.0167 | 0.0221  | -0.0129 | 0.5969 | 7.0333  | 0.0072 | 6.46   | 0.0072 |
| Zip523  | 25   | 1.2778  | 0.3213 | 0.3586 | 0.0058 | 0.0053 | 0.0856 | 0.9852 | 0.0063  | 0.0006  | 0.0856 | 0.9828  | 0.3908 |         |         |        |         |        |        |        |
| Zip522  | 23   | 0.9776  | 0.5182 | 0.2985 | 0.0045 | 0.0041 | 0.067  | 0.9613 | 0.005   | 0.003   | 0.067  | 1.061   | 0.3844 |         |         |        |         |        |        |        |
| Zip707  | 23   | 4.006   | 0.0102 | 0.6367 | 0.0175 | 0.0099 | 0.6059 | 0.9394 | 0.0292  | 0.0151  | 0.4026 | 7.0809  | 0.0043 | 0.0135  | -0.0101 | 0.6059 | 7.3032  | 0.001  | 4.8973 | 0.0193 |
| Zip810  | 25   | 1.7448  | 0.1757 | 0.4286 | 0.0119 | 0.0084 | 0.295  | 0.9545 | 0.0028  | 0.017   | 0.295  | 4.3939  | 0.0256 |         |         |        |         |        |        |        |
| Zir     | 23   | 3.5143  | 0.0177 | 0.6959 | 0.0058 | 0.003  | 0.4906 | 0.9715 | -0.0108 | 0.0106  | 0.4906 | 9.7146  | 0.001  |         |         |        |         |        |        |        |
| Zip526  | 24   | 12.0843 | 0      | 0.8409 | 0.0134 | 0.0025 | 0.8185 | 0.9547 | 0.0242  | 0.0128  | 0.6802 | 22.957  | 0      | -0.0024 | -0.0117 | 0.8185 | 21.4186 | 0      | 6.9252 | 0.0055 |
| Zirc2   | 23   | 4.5858  | 0.0057 | 0.6864 | 0.0154 | 0.0064 | 0.5822 | 0.9437 | -0.0074 | -0.0201 | 0.3531 | 5.732   | 0.0103 | 0.0113  | 0.0134  | 0.5822 | 6.6198  | 0.0018 | 5.2095 | 0.0157 |
| Zkscan1 | 25   | 0.9946  | 0.4896 | 0.3032 | 0.007  | 0.0056 | 0.1975 | 0.9675 | 0.0062  | 0.0066  | 0.1975 | 2.5842  | 0.0992 |         |         |        |         |        |        |        |
| Zmit    | 23   | 1.7912  | 0.1562 | 0.4394 | 0.0037 | 0.0032 | 0.1532 | 0.9769 | -0.0041 | 0.0054  | 0.1532 | 1.899   | 0.1746 |         |         |        |         |        |        |        |

Table S3

| Gene symbol       | RefSeq ID    | Chromosome | Start Position | End Position | Strand   | Genbank ID                                                     | Gene Description                                                                                                 |
|-------------------|--------------|------------|----------------|--------------|----------|----------------------------------------------------------------|------------------------------------------------------------------------------------------------------------------|
| 1 0610012D14Rik   | NM_026990    | chr7       | 51720263       | 51723122     | +        | BC019451                                                       | RIKEN cDNA 0610012D14 gene                                                                                       |
| 2 180012F05Rik    | NM_026991    | chr13      | 18001265       | 18001271     | +        | BC038311                                                       | RIKEN cDNA 180012F05 gene                                                                                        |
| 3 0019A05Rik      | NM_028126    | chr11      | 10620464       | 10620476     | +        | BC052363                                                       | RIKEN cDNA 2810019A05 gene                                                                                       |
| 4 2810008M24Rik   | chr13        | 108834640  | 10883366       | +            | BC004049 | RIKEN cDNA 2810008M24 gene   hypothetical protein LOC100048418 |                                                                                                                  |
| 5 Aarsd1          | NM_144829    | chr11      | 101268151      | 101278747    | +        | BC005711                                                       | alanyl-tRNA synthetase domain containing 1                                                                       |
| 6 Acpj            | NM_007408    | chr4       | 86302469       | 86315963     | +        | M59275                                                         | lipidase differentiation related protein                                                                         |
| 7 Acsh            | NM_007430    | chr4       | 131709126      | 131709126    | +        | AF453078                                                       | alcohol dehydrogenase 5 (class III), cIIi polypeptide                                                            |
| 8 Agl             | NM_001081326 | chr3       | 116445969      | 116510327    | +        | BC044780                                                       | amylolytic-1,6-glucosidase, 4-alpha-glucanotransferase                                                           |
| 9 Alas1           | NM_020559    | chr9       | 106136258      | 106150187    | +        | BC022110                                                       | aminolevulinic acid synthase 1                                                                                   |
| 10 Anrk25         | chr8         |            |                |              |          |                                                                |                                                                                                                  |
| 11 Apo11          | NM_007456    | chr8       | 74764031       | 74781278     | +        | M62419                                                         | adaptor-related protein complex AP-1, mu subunit 1                                                               |
| 12 Armcs          | NM_146205    | chr7       | 135380871      | 135388614    | +        | BC089363                                                       | armadillo repeat containing 5                                                                                    |
| 13 Aag2b          | NM_029654    | chr12      | 106855833      | 106885039    | +        | BC046427                                                       | ATG2 autophagy related 2 homolog B (S. cerevisiae)                                                               |
| 14 Atpv1e1        | NM_007510    | chr6       | 120745262      | 120772719    | +        | BC030341                                                       | VATPase, H+ transporting, lysosomal V1 subunit E1                                                                |
| 15 Atnv2          | NM_183020    | chr7       | 133635222      | 133646816    | +        | BC054843                                                       | ataxin 2-like                                                                                                    |
| 16 Bcl2l1         | NM_009743    | chr2       | 152584468      | 152657418    | +        | BC089016                                                       | Bcl2-like 1                                                                                                      |
| 17 C230096C10Rik  | NM_146157    | NM         | 138908508      | 139045143    | +        | BC129804                                                       | RIKEN cDNA C230096C10 gene   ubiquitin protein ligase E3 component n-recognin 4                                  |
| 18 C22bp2         | NM_027353    | chr7       | 134335174      | 134339514    | +        | BC089520                                                       | CD2 antigen (cytoplasmic tail) binding protein 2                                                                 |
| 19 Dhps           | NM_001039514 | chr8       | 87358588       | 87359060     | +        | BC081224                                                       | deoxythymine synthase                                                                                            |
| 20 Doye           | NM_022722    | chr15      | 39600031       | 39689013     | +        | AF249296                                                       | dihydropyrimidinase                                                                                              |
| 21 Egln2          | NM_053208    | chr7       | 27943677       | 27951792     | +        | AF453879                                                       | EGL nine homolog 2 (C. elegans)                                                                                  |
| 22 Eflh           | NM_025794    | chr3       | 79407723       | 79432642     | +        | BC056760                                                       | electron transferring flavoprotein, dehydrogenase                                                                |
| 23 Fbxo20         | NM_028149    | chr11      | 97943868       | 98010930     | +        | AF649694                                                       | F-box and leucine-rich repeat protein 20                                                                         |
| 24 Ganc           |              |            |                |              |          |                                                                |                                                                                                                  |
| 25 Gnatp          | NM_010322    | chr8       | 127386730      | 127413957    | +        | BC025972                                                       | glyceronephosphate O-acyltransferase                                                                             |
| 26 Gpsn2          | NM_134118    | chr8       | 86095597       | 86118376     | +        | BC009408                                                       | glycoprotein, synaptic 2   RIKEN cDNA 1600014K23 gene                                                            |
| 27 Hars           | NM_009814    | chr18      | 36262184       | 36282300     | +        | BC020588                                                       | histidyl-tRNA synthetase                                                                                         |
| 28 Hebp1          | NM_013546    | chr11      | 135897456      | 135185955    | +        | AF117415                                                       | heme binding protein 1                                                                                           |
| 29 Hnrm           | NM_029804    | chr17      | 33783181       | 33823805     | +        | BC064785                                                       | heterogeneous nuclear ribonucleoprotein M   membrane-associated ring finger (C3HC4) 2                            |
| 30 Hspd1          | NM_010477    | chr1       | 55134679       | 55144689     | +        | BC016460                                                       | heat shock protein 1 (chaperonin)                                                                                |
| 31 Ipa            | NM_025922    | chr2       | 130435453      | 130507350    | +        | BC089446                                                       | inosine triphosphatase (nucleoside triphosphate pyrophosphatase)                                                 |
| 32 Irrm4          | NM_021338    | chr12      | 92307086       | 92307264     | +        | BC020785                                                       | LYR motif containing 4                                                                                           |
| 33 Map3k1         | NM_011945    | chr13      | 112536841      | 112599191    | +        | AF117340                                                       | mitogen-activated protein kinase kinase kinase 1                                                                 |
| 34 Mcm3           | NM_008563    | chr1       | 20793054       | 20810341     | +        | BC031700                                                       | minichromosome maintenance deficient 3 (S. cerevisiae)                                                           |
| 35 Met3           | NM_011822    | chr13      | 62915449       | 62916150     | +        | BC094028                                                       | malic enzyme 1, NADP(+)-dependent, cytosolic                                                                     |
| 36 Mps9           | NM_025500    | chr7       | 108128487      | 108137605    | +        | BC089520                                                       | mitochondrial ribosomal protein L37                                                                              |
| 37 Nmt1           | NM_008707    | chr11      | 102889885      | 102927419    | +        | BC021635                                                       | N-methyltransferase 1                                                                                            |
| 38 Nin2i          | NM_010947    | chr17      | 23430776       | 23436332     | +        | BC094362                                                       | netrin 2-like (chicken)                                                                                          |
| 39 Pgg            | NM_011822    | chr17      | 26063369       | 26078907     | +        | BC014287                                                       | phosphatidylinositol glycan anchor biosynthesis, class Q                                                         |
| 40 Pgy            | NM_178698    | chr14      | 113718320      | 113728118    | +        | BC014287                                                       | phosphatidylinositol glycan anchor biosynthesis, class V                                                         |
| 41 Pomt1          | NM_145145    | chr2       | 32092143       | 32110525     | +        | BC027325                                                       | protein-O-mannosyltransferase 1                                                                                  |
| 42 Pqic2          | NM_145384    | chr4       | 138849945      | 138866600    | +        | BC019216                                                       | PQ loop repeat containing 2                                                                                      |
| 43 Psmg3          | NM_025604    | chr5       | 140299548      | 140302839    | +        | BC058992                                                       | proteasome (prosome, macropain) assembly chaperone 3                                                             |
| 44 Ptm            | NM_023697    | chr1       | 68423300       | 68423733     | +        | BC034171                                                       | protomyosin alpha                                                                                                |
| 45 Rexo2          | NM_024233    | chr1       | 48276617       | 48288716     | +        | BC003445                                                       | REX2, RNA exonuclease 2 homolog (S. cerevisiae)                                                                  |
| 46 Rok3           | NM_024182    | chr18      | 12287268       | 12315876     | +        | BC033271                                                       | RIO kinase 3 (yeast)                                                                                             |
| 47 Rpl29          | XR_002091    | XR         | 136414607      | 136412558    | +        | U08651 BC08                                                    | ribosomal protein L29                                                                                            |
| 48 Sdcag3         | NM_025563    | NM         | 26236322       | 26244626     | +        | BC031199                                                       | serologically defined colon cancer antigen 3                                                                     |
| 49 Sic3           | NM_028293    | chr14      | 103446441      | 103417413    | +        | AF513271                                                       | SET domain containing 3                                                                                          |
| 50 Sic25a30       | NM_026232    | chr4       | 76160883       | 76188844     | +        | BC022676                                                       | solute carrier family 25, member 30                                                                              |
| 51 Srp54a         |              |            |                |              |          |                                                                |                                                                                                                  |
| 52 Srt3           | NM_133726    | chr15      | 81195470       | 81230124     | +        | BC003843                                                       | suppression of tumorigenicity 13                                                                                 |
| 53 Ssk24          | NM_045453    | chr14      | 121855663      | 121778458    | +        | AY138557                                                       | serine/threonine kinase 24 (STE20 homolog, yeast)                                                                |
| 54 Tex2           | NM_198292    | chr11      | 106363448      | 106474244    | +        | BC057405                                                       | testis expressed gene 2                                                                                          |
| 55 Txn1           | NM_007558    | chr1       | 44520758       | 44521076     | +        | BC094415                                                       | thioredoxin 1                                                                                                    |
| 56 Txndc1         | NM_026339    | chr12      | 71584327       | 71586811     | +        | BC017603                                                       | thioredoxin domain containing 1                                                                                  |
| 57 Ube2z          | NM_172338    | chr9       | 95908744       | 95909218     | +        | BC054412                                                       | ubiquitin-conjugating enzyme E2Z (putative)                                                                      |
| 58 Ubr1           | NM_001122873 | chr2       | 57578793       | 57777777     | +        | BC094047                                                       | ubiquitin-like 7 (bone marrow stromal cell-derived)                                                              |
| 59 Wasl1          | NM_031877    | chr10      | 40603379       | 40685375     | +        | BC016896                                                       | WASP family 1                                                                                                    |
| 60 Zfp313         | NM_030743    | chr2       | 167318145      | 167341673    | +        | BC085146                                                       | Zinc finger protein 313                                                                                          |
| 61 Zfp92          | NM_178707    | chr7       | 88138970       | 88139769     | +        | BC016896                                                       | Zinc finger protein 92                                                                                           |
| 62 Z50003M10Rik   |              | chr3       | 90302878       | 90313394     | +        | BC120651                                                       | RIKEN cDNA Z50003M10 gene                                                                                        |
| 63 Z530427N09Rik  |              | chr18      | 64240419       | 64241074     | +        |                                                                | RIKEN cDNA Z530427N09 gene                                                                                       |
| 64 AS33082C11Rik  | NM_177186    | chr4       | 154975825      | 154997449    | +        | BC058728                                                       | RIKEN cDNA AS33082C11 gene                                                                                       |
| 65 Ahyv           |              |            | 71874320       | 71874320     | +        |                                                                | S-adenosylhomocysteine hydrolase                                                                                 |
| 66 Ak3            | NM_021299    | chr19      | 29095322       | 29122445     | +        | BC058191                                                       | adenylate kinase 3                                                                                               |
| 67 BC008163       |              | chr4       | 132458518      | 132478426    | +        | BC008163                                                       |                                                                                                                  |
| 68 BC016423       | NM_134063    | chr13      | 3965281        | 3610342      | +        | BC016423                                                       |                                                                                                                  |
| 69 Bax1a          | NM_007617    | chr1       | 28414985       | 28414985     | +        | BC003879                                                       | branched chain ketoacid dehydrogenase E1, alpha polypeptide                                                      |
| 70 Cat            | NM_009804    | chr2       | 10324064       | 10322280     | +        | BC013447                                                       | catalsase                                                                                                        |
| 71 Cep68          | NM_172260    | chr11      | 20127040       | 20149427     | +        | BC027174                                                       | centrosomal protein 68                                                                                           |
| 72 Crk            | NM_133656    | chr11      | 75492812       | 75519596     | +        | BC012216                                                       | v-crk sarcoma virus CT10 oncogene homolog (avian)                                                                |
| 73 Ctn            | NM_007603    | chr7       | 151621028      | 151695642    | +        | U03134                                                         | cortactin                                                                                                        |
| 74 Dhah           | NM_027893    | chr12      | 92144163       | 92144163     | +        | BC116414                                                       | dihydrodipicolinate dehydrogenase (dimeric)                                                                      |
| 75 Dnaj1          | NM_008298    | chr4       | 40689566       | 40681997     | +        | AF055664                                                       | DnaJ (Hsp40) homolog, subfamily A, member 1                                                                      |
| 76 Hnrip1         | NM_144802    | chr17      | 80428277       | 80461674     | +        | BC012849                                                       | heterogeneous nuclear ribonucleoprotein L-like                                                                   |
| 77 Lasp1          | NM_010688    | chr11      | 97609886       | 97700778     | +        | BC010840                                                       | LIM and SH3 protein 1                                                                                            |
| 78 Map3k4         | NM_033892    | chr9       | 54013388       | 54014112     | +        | BC026226                                                       | mitogen-activated protein kinase kinase 1                                                                        |
| 79 Mrip18         | NM_026310    | chr17      | 13104221       | 13108957     | +        | BC011425                                                       | mitochondrial ribosomal protein L18                                                                              |
| 80 Miyd116        | NM_008654    | chr7       | 52778290       | 52781583     | +        | BC088180                                                       | myeloid differentiation primary response gene 116                                                                |
| 81 Nup54          | NM_183392    | chr5       | 92844566       | 92864225     | +        | BC068114                                                       | nucleoporin 54                                                                                                   |
| 82 Nup98          | NM_179398    | chr11      | 433198148      | 433198148    | +        | AF008412                                                       | PAK binding protein 9                                                                                            |
| 83 Rhbdf2         | NM_125752    | chr11      | 116459479      | 116488333    | +        | BC052182                                                       | rhomboid 5 homolog 2 (Drosophila)                                                                                |
| 84 Rpl22          | NM_009079    | chr4       | 151698835      | 151708180    | +        | BC021344                                                       | ribosomal protein L22   ribosomal protein L22 pseudogene                                                         |
| 85 Rps84a         | NM_019924    | chr19      | 6903574        | 6915117      | +        | AF074714                                                       | ribosomal protein S8 kinase, polypeptide 4                                                                       |
| 86 Scol           | NM_011531    | chr2       | 16494947       | 16494947     | +        | BC056271                                                       | synexin 4                                                                                                        |
| 87 Tmco1          | NM_001038483 | chr1       | 169238601      | 169284301    | +        | BC020098                                                       | transmembrane and coiled-coil domains 1                                                                          |
| 88 Tmem33         | NM_028975    | chr5       | 67651891       | 67682700     | +        | BC016650                                                       | transmembrane protein 33                                                                                         |
| 89 Ttk2           | NM_001024856 | chr2       | 120558552      | 120676340    | +        | AB046953                                                       | ttau tubulin kinase 2                                                                                            |
| 90 Ube2z          | NM_009456    | chr11      | 51709264       | 51813889     | +        | U57890                                                         | ubiquitin-conjugating enzyme E2B, RAD6 homolog (S. cerevisiae)                                                   |
| 91 Ube3           | NM_027166    | chr7       | 7186044        | 7186044      | +        | U57890                                                         | ubiquitin-like 5 (Drosophila)                                                                                    |
| 92 0610007L01Rik  | NM_001081394 | chr5       | 130688295      | 130719535    | +        | BC033455                                                       | RIKEN cDNA 0610007L01 gene                                                                                       |
| 93 2010005J08Rik  | NM_178623    | NM         | 5614188        | 5662260      | +        | BC069994                                                       | RIKEN cDNA 2010005J08 gene                                                                                       |
| 94 ZT0047013Rik   | NM_024185    | chr2       | 12288891       | 12341087     | +        | BC027202                                                       | RIKEN cDNA ZT0047013 gene                                                                                        |
| 95 ZT01018020Rik  | NM_025354    | chr2       | 158634834      | 158634834    | +        | BC027452                                                       | RIKEN cDNA ZT01018020 gene                                                                                       |
| 96 Z523040G24Rik  |              | chr1       | 82721493       | 82748969     | +        | BC059229                                                       | RIKEN cDNA Z523040G24 gene                                                                                       |
| 97 9130023H24Rik  | NM_177001    | chr7       | 135379920      | 135380933    | +        | BC089520                                                       | RIKEN cDNA 9130023H24 gene                                                                                       |
| 98 AS33005K11Rik  | NM_183148    | chr13      | 67717938       | 67738728     | +        | BC088180                                                       | RIKEN cDNA AS33005K11 gene                                                                                       |
| 99 Ahsr784        |              |            | 48929142       | 48948748     | +        |                                                                |                                                                                                                  |
| 100 Akap6         | NM_017476    | chr17      | 32458369       | 32475222     | +        | BC051015                                                       | A kinase (PKA) anchor protein 6-like                                                                             |
| 101 Akb6          | NM_198027    | chr7       | 31093772       | 31093253     | +        | BC029805                                                       | alkB, alkylated repair homolog 6 (E. coli)                                                                       |
| 102 Aks2r2        | NM_172656    | chr1       | 59030415       | 59052559     | +        | BC058514                                                       | amyotrophic lateral sclerosis 2 (juvenile) chromosome region, candidate 2 (human)                                |
| 103 Aps3          | NM_017015    | chr2       | 131746586      | 131746586    | +        | BC116218                                                       | ATP synthase, H+ transporting, mitochondrial F0 complex, subunit c (beta prime), isoform 3                       |
| 104 Atp5f         | NM_016755    | chr16      | 84828111       | 84835819     | +        | BC010766                                                       | ATP synthase, H+ transporting, mitochondrial F0 complex, subunit F1/ATP synthase, H+ transporting, mitochondrial |
| 105 B4gal7        | NM_146045    | chr13      | 55701257       | 55711804     | +        | BC056703                                                       | xyloxyprotein beta 1,4-galactosyltransferase, polypeptide 7 (galactosyl synthase I)                              |
| 106 BC022224      | NM_177564    | chr11      | 84634228       | 84642488     | +        | BC022224                                                       |                                                                                                                  |
| 107 Bmp1a         | NM_009758    | chr13      | 35224252       | 35224252     | +        | BC088180                                                       | bone morphogenetic protein receptor, type 1A                                                                     |
| 108 C330011K17Rik |              | chr13      | 67527195       | 67525247     | +        | BC088180                                                       | RIKEN cDNA C330011K17 gene                                                                                       |
| 109 Cdc104        | NM_025740    | chr11      | 29121536       | 29147306     | +        | BC005731                                                       | coiled-coil domain containing 104                                                                                |
| 110 Cdc115        | NM_027159    | chr11      | 34493521       | 34496517     | +        | BC019430                                                       | coiled-coil domain containing 115                                                                                |
| 111 Cdc20f1       | NM_00103314  | chr7       | 190760233      | 190760233    | +        | BC019430                                                       | coiled-coil domain containing 2                                                                                  |
| 112 Cdc27         | NM_133744    | chr9       | 108362858      | 108388269    | +        | BC018518                                                       | coiled-coil domain containing 91                                                                                 |
| 113 Cdc37f1       | NM_025950    | chr19      | 29064857       | 29092061     | +        | BC031761                                                       | cell division cycle 37 homolog (S. cerevisiae)-like 1                                                            |
| 114 Cldp1         | NM_011801    | chr8       | 114292373      | 114378210    | +        | BC005589                                                       | craniofacial development protein 1                                                                               |
| 115 Cnorf8        | NM_178854    | NM         | 86954068       | 86951000     | +        | BC031806                                                       | CORA-107 transcription complex, subunit 6-like                                                                   |
| 116 Cpbd2         | NM_011802    | chr7       | 98448801       | 98448801     | +        | BC016675                                                       | costarmer protein complex, subunit beta 2 (beta prime)                                                           |
| 117 Dchn6         | NM_011722    | chr8       | 35153474       | 35171512     | +        | BC029249                                                       | dyncin 6                                                                                                         |
| 118 Dhx36         | NM_028136    | chr3       | 62274005       | 62310910     | +        | AF448804                                                       | DEAH (Sp-Glu-Ala-His) box polypeptide 36                                                                         |
| 119 Dym12         | NM_026556    | chr11      | 87793027       | 87801007     | +        | BC040822                                                       | dymn light chain LC8-type 2                                                                                      |
| 120 Efr1a         | NM_010120    | chr16      | 4617338        | 46189892     | +        | AF026461                                                       | eukaryotic transition initiation factor 1A                                                                       |
| 121 Eps15f1       | NM_007944    | chr8       | 74884902       | 74943559     | +        | U29156                                                         | epidermal growth factor receptor pathway substrate 15-like 1                                                     |
| 122 Fbxo38        | NM_134136    | chr18      | 62683805       | 62708368     | +        | BC066348                                                       | F-box protein 38                                                                                                 |
| 123 Gorasp1       | NM_028976    | chr9       | 119834791      | 119846676    | +        | BC012251                                                       | golgi reassembly stacking protein 1                                                                              |
| 124 Hnrip1        | NM_144829    | chr17      | 80589611       | 80597369     | +        | BC012849                                                       | heterogeneous nuclear ribonucleoprotein U-like 1                                                                 |
| 125 Hsp84         | NM_008300    | chr11      | 53073316       | 53113981     | +        | BC030770                                                       | heat shock protein 4                                                                                             |
| 126 Igf1          | NM_010512    | chr10      | 87321813       | 87394870     | +        | BC012409                                                       | insulin-like growth factor 1                                                                                     |
| 127 LOC100041835  |              |            |                |              |          |                                                                |                                                                                                                  |
| 128 Lsr1          | NM_178069    | chr16      | 30580580</     |              |          |                                                                |                                                                                                                  |

|     |                |              |       |            |            |          |                                                                                          |
|-----|----------------|--------------|-------|------------|------------|----------|------------------------------------------------------------------------------------------|
| 160 | Ubag2          | NM_026872    | chr4  | 41141348   | 41222168   | BC007179 | Ubiquitin-associated protein 2                                                           |
| 161 | Ube2c          | NM_144839    | chr14 | 19406091   | 19726141   | BC016265 | Ubiquitin-conjugating enzyme E2E 2 (UBC4/5 homolog, yeast)                               |
| 162 | Ubp3           | NM_01028934  | chr4  | 849147892  | 849147892  | BC029037 | ubiquitin-specific protease 32                                                           |
| 163 | Wdr22          | NM_177267    | chr12 | 81436835   | 81537526   | AK122561 | WD repeat domain 22                                                                      |
| 164 | Wdr51b         | NM_027740    | chr10 | 98568605   | 98666022   | BC026888 | WD repeat domain 51b                                                                     |
| 165 | Znfx3          | NM_173424    | chr1  | 162938931  | 162964966  | BC113763 | zinc finger and B1B domain containing 37                                                 |
| 166 | Znf7           | BC073107     | chr7  | 59278356   | 59278356   | BC073107 | zinc finger protein 7                                                                    |
| 167 | Znf472         | NM_153063    | chr17 | 33102787   | 33116006*  | BC027407 | zinc finger protein 472                                                                  |
| 168 | Znfx3          | NM_177263    | chr2  | 160596183  | 160688726  | BC058111 | zinc fingers and homeoboxes 3                                                            |
| 169 | 37881          | NM_177115    | chr18 | 58821370   | 57085202   | BC107232 | membrane-associated ring finger (C3HC4) 3                                                |
| 170 | R10009B22Rik   | NM_01086819  | chr11 | 514688886  | 514688886  | BC024353 | RIKEN cDNA 061009823 gene                                                                |
| 171 | R110049F12Rik  | NM_025411    | chr4  | 135531517  | 135543160  | BC052895 | RIKEN cDNA 1110049F12 gene                                                               |
| 172 | R1200016B10Rik | NM_025819    | chr1  | 153214829  | 153275566  | BC060204 | RIKEN cDNA 1200016B10 gene                                                               |
| 173 | R1700021F05Rik | NM_026411    | chr10 | 43244927   | 43280800   | BC013506 | RIKEN cDNA 1700021F05 gene                                                               |
| 174 | R210009C31Rik  | NM_001038441 | chr10 | 136536351  | 136697686* | BC026037 | RIKEN cDNA 210009C31 gene                                                                |
| 175 | R221001L05Rik  | NM_133829    | chr11 | 52713148   | 52784162   | BC017534 | RIKEN cDNA 221001L05 gene                                                                |
| 176 | R2210018M11Rik | NM_172280    | chr7  | 105739101  | 105805079  | BC089304 | RIKEN cDNA 2210018M11 gene                                                               |
| 177 | R2210412D01Rik | NM_133722    | chr7  | 91257866   | 91300403   | BC018511 | RIKEN cDNA 2210412D01 gene                                                               |
| 178 | R261002E42Rik  | NM_00114977  | chr9  | 34604225   | 34686772   | BC031469 | RIKEN cDNA 261002E42 gene                                                                |
| 179 | R261010N10Rik  | NM_00114977  | chr9  | 95380291   | 95412416   | BC088205 | RIKEN cDNA 261010N10 gene                                                                |
| 180 | R2610528E23Rik | NM_025599    | chr16 | 57302113   | 57609879   | BC038891 | RIKEN cDNA 2610528E23 gene                                                               |
| 181 | R3030401K13Rik | NM_001079814 | chr16 | 5014030    | 5049953    | BC006893 | RIKEN cDNA 3030401K13 gene                                                               |
| 182 | R4632411B12Rik | NM_172632    | chr1  | 36392755   | 36426026   | BC132293 | RIKEN cDNA 4632411B12 gene                                                               |
| 183 | R4830474A06Rik | NM_001081012 | chr4  | 83171600   | 83310835   | BC019810 | RIKEN cDNA 4830474A06 gene                                                               |
| 184 | R4930535B03Rik | NM_001081293 | chr3  | 95565563   | 95622899   | BC067054 | RIKEN cDNA 4930535B03 gene                                                               |
| 185 | R5830418K08Rik | NM_178976    | chr19 | 15107787   | 15162148   | AK220270 | RIKEN cDNA 5830418K08 gene   similar to KIAA1731 protein                                 |
| 186 | R9303612M13Rik | NM_172458    | chr7  | 32908181   | 32924492   | BC043671 | RIKEN cDNA 9030612M13 gene                                                               |
| 187 | R230367G21Rik  | NM_01091948  | chr9  | 1493398112 | 1493398112 | BC037588 | RIKEN cDNA A230367G21 gene                                                               |
| 188 | Aatf           | NM_019816    | chr4  | 84236358   | 84327003   | BC025080 | apoptosis antagonizing transcription factor                                              |
| 189 | Abca1          | NM_013454    | chr4  | 53043660   | 53172767   | BC018910 | ATP-binding cassette, sub-family A (ABC1), member 1                                      |
| 190 | Abcc10         | NM_145140    | chr17 | 46440161   | 46464972   | AF406642 | ATP-binding cassette, sub-family C (CFTR/MRP), member 10                                 |
| 191 | Abcc2          | NM_001381    | chr2  | 24309134   | 24309134   | BC039283 | ATP-binding cassette, sub-family F (GCN20), member 2                                     |
| 192 | Abd1           | NM_001077190 | chr2  | 22805705   | 22895585   | AF420251 | abd-interactor 1                                                                         |
| 193 | Acly           | NM_134037    | chr11 | 100337670  | 100389215  | BC056378 | ATP citrate lyase                                                                        |
| 194 | Acox1          | NM_015729    | chr11 | 116033202  | 116090359  | BC066448 | acyl-Coenzyme A oxidase 1, palmitoyl                                                     |
| 195 | Actm           | NM_134156    | chr12 | 81268532   | 813119303  | BC054330 | actinin, alpha 1                                                                         |
| 196 | Aft1           | NM_00108198  | chr5  | 104183358  | 104280142  | BC131685 | AK4-FIRK2 family, member 1                                                               |
| 197 | Alb47670       | NM_177869    | chr5  | 20930882   | 20987942*  | BC055342 |                                                                                          |
| 198 | Alcam          | NM_009655    | chr16 | 52251003   | 52451487   | BC027280 | activated leukocyte cell adhesion molecule                                               |
| 199 | Aldehyde1      | NM_134042    | chr12 | 85771667   | 85781953   | BC033440 | aldehyde dehydrogenase family 6, subfamily A1                                            |
| 200 | Alp2           | NM_019818    | chr4  | 47482705   | 47487110   | BC035481 | alphanosyltransferase 2 homolog (yeast, alpha-1,3-mannosyltransferase)                   |
| 201 | Ampd2          | NM_028779    | chr3  | 107876980  | 107889545  | BC049119 | adenosine monophosphate deaminase 2 (isoform L)                                          |
| 202 | Ankrd13c       | NM_001013806 | chr3  | 157610215  | 157669801* | BC056088 | ankyrin repeat domain 13c                                                                |
| 203 | Ankrd17        | NM_000898    | chr10 | 90566191   | 90795590   | AF130371 | ankyrin repeat domain 17                                                                 |
| 204 | Ankrd44        | NM_001045333 | chr10 | 54710593   | 548038013  | BC037588 | ankyrin repeat domain 44                                                                 |
| 205 | Apal1          | NM_001042558 | chr10 | 90452058   | 90545515   | BC131683 | apoptotic peptidase activating factor 1                                                  |
| 206 | Apob           | NM_009693    | chr12 | 7984479    | 8023641*   | BC100607 | apolipoprotein B                                                                         |
| 207 | App            | NM_007471    | chr16 | 84854988   | 85173948   | BC070409 | amyloid beta (A $\beta$ ) precursor protein                                              |
| 208 | Arfp1          | NM_001031093 | chr3  | 84301858   | 84331938   | BC132291 | ADP-ribosylation factor interacting protein 1                                            |
| 209 | Arhgap12       | NM_001039692 | chr18 | 6024446    | 6136096    | BC024633 | Rho GTPase activating protein 12                                                         |
| 210 | Arhgap17       | NM_144529    | chr17 | 130419361  | 130513398  | AB065553 | Rho GTPase activating protein 17                                                         |
| 211 | Arid5b         | NM_023598    | chr10 | 67588341   | 67741488   | AF280065 | AT rich interactive domain 5B (MIF1 like)                                                |
| 212 | Arnt1          | NM_019928    | chr10 | 94523403   | 94523403   | BC039892 | arnt-like domain containing protein 1                                                    |
| 213 | Arl5a          | NM_182994    | chr2  | 52523467   | 52280394   | BC041071 | ADP-ribosylation factor-like 5A                                                          |
| 214 | Asah1          | NM_019734    | chr8  | 42426004   | 42460587   | AF352179 | N-acylsphingosine amidohydrolase 1                                                       |
| 215 | Atad1          | NM_026487    | chr19 | 32747050   | 32786812   | BC029085 | AT-Pase family, AAA domain containing 1                                                  |
| 216 | Atrf2          | NM_001031304 | chr3  | 172837445  | 172789689  | BC033453 | activating transcription factor 6                                                        |
| 217 | Atp5f          | NM_053069    | chr10 | 43988164   | 44084097*  | BC002166 | atpophagy-related 5 (yeast)                                                              |
| 218 | Bad            | NM_007522    | chr19 | 7016351    | 7026388*   | BC006762 | Bcl-associated death promoter                                                            |
| 219 | Bag1           | NM_026121    | chr8  | 26875008   | 26899681   | AF332863 | BCL2-associated atrophogene 4                                                            |
| 220 | Bair1          | NM_007525    | chr17 | 71074294   | 71074461   | BC017461 | BRCA1 associated RING domain 1                                                           |
| 221 | BC011248       |              | chr17 | 48604381   | 48611236   | BC011248 |                                                                                          |
| 222 | BC029169       |              | chr11 | 109534237  | 109583570  | BC029169 |                                                                                          |
| 223 | Brp1           | NM_178309    | chr11 | 85871638   | 86014695   | BC094252 | BRCA1 interacting protein C-terminal helicase 1                                          |
| 224 | Bst2           | NM_198095    | chr8  | 74057851   | 74081336   | BC087349 | bone marrow stromal cell antigen 2                                                       |
| 225 | Btbd9          | NM_178119    | chr14 | 37570295   | 37570295   | BC059189 | BTB (POZ) domain containing 9                                                            |
| 226 | Btf3           | NM_145455    | chr13 | 99079850   | 99089922   | BC064010 | basic transcription factor 3                                                             |
| 227 | Bxd5c          | NM_027371    | chr13 | 146169308  | 146184382  | BC089369 | brix domain containing 5                                                                 |
| 228 | C130022K22Rik  | NM_172730    | chr6  | 91828053   | 91849842*  | BC051147 | RIKEN cDNA C130022K22 gene                                                               |
| 229 | C130094A16Rik  | NM_148016    | chr11 | 28684134   | 28684134   | BC052478 | RIKEN cDNA C130094A16 gene                                                               |
| 230 | C3             | NM_009776    | chr17 | 57343396   | 57367514   | BC043338 | complement component 3                                                                   |
| 231 | Canx           | NM_007597    | chr11 | 50107965   | 50139094   | BC040244 | calnexin                                                                                 |
| 232 | Ccdc49         | NM_026186    | chr11 | 97066795   | 97627870   | BC079553 | coiled-coil domain containing 49                                                         |
| 233 | Ccdc55         | NM_001012099 | chr11 | 76831794   | 76831794   | BC079553 | coiled-coil domain containing 55                                                         |
| 234 | Ccm1           | NM_026484    | chr18 | 9314042    | 9450107    | BC023321 | cyclin Y similar to cyclin fold protein 1                                                |
| 235 | Ccnc1          | NM_007683    | chr5  | 86441049   | 86494496   | U03113   | centromere protein C1                                                                    |
| 236 | Cep152         | NM_001081091 | chr2  | 125388826  | 125450449  | BC019405 | centrosomal protein 152                                                                  |
| 237 | Chchd4         | NM_142916    | chr10 | 51414270   | 51414270   | BC019405 | coiled-coil-helix-coiled-coil-helix domain containing 4                                  |
| 238 | Chmd7          | NM_134078    | chr14 | 70116507   | 70132348   | BC033365 | CHMP family, member 7                                                                    |
| 239 | Citc           | NM_001003908 | chr11 | 86508153   | 86570994   | BC079897 | clathrin, heavy polypeptide (Hc)                                                         |
| 240 | Cntm8          | NM_027294    | chr9  | 114688463  | 114753270  | AY243513 | CK1F-like MARVEL transmembrane domain containing 8                                       |
| 241 | Cnd2           | NM_023149    | chr18 | 84636857   | 84655025   | BC079537 | CNDP dipeptidase 2 (metallopeptidase M20 family)                                         |
| 242 | Cnfr4          | NM_016848    | chr16 | 34972026   | 35037181   | BC058778 | CcR4-NO1 transcription complex, subunit 4                                                |
| 243 | Cobh1          | NM_170225    | chr2  | 64926408   | 65077480   | AY308746 | Cob-like 1                                                                               |
| 244 | Cox4nb         | NM_010926    | chr8  | 123177814  | 123192012  | BC009103 | COX4 neighbor                                                                            |
| 245 | Crad4          | NM_009950    | chr10 | 94637373   | 94766731   | BC050508 | CASP2 and RIFK1 domain containing adaptor with death domain                              |
| 246 | Crb2           | NM_178616    | chr11 | 37381021   | 37381021   | BC029754 | CaMK responsive element binding protein 3-like 2                                         |
| 247 | Cs             | NM_026444    | chr10 | 127774873  | 127795335  | BC029754 | citrate synthase                                                                         |
| 248 | Csk1a1         | NM_146087    | chr18 | 61714987   | 61748428*  | BC019740 | casein kinase 1, alpha 1                                                                 |
| 249 | Clagef         | NM_146034    | chr12 | 60230733   | 60291163*  | BC028684 | C1AGE family, member 5                                                                   |
| 250 | Clnp1          | NM_026229    | chr18 | 80684088   | 80684088   | BC064334 | Clp1 (carboxyl-terminal domain, RNA polymerase II, polypeptide A) phosphatase, subunit 1 |
| 251 | Cux1           | NM_009986    | chr5  | 136724005  | 137043301  | BC079570 | cut-like homeobox 1                                                                      |
| 252 | Cyp4f14        | NM_022434    | chr17 | 33042015   | 33054274   | AB037540 | cytochrome P450, family 4, subfamily f, polypeptide 14                                   |
| 253 | D2Wsu81e       | NM_172660    | chr2  | 30029273   | 30033975   | BC078441 | DNA segment, Chr 2, Wayne State University 81, expressed                                 |
| 254 | DK30037F22Rik  | NM_001033885 | chr10 | 187109175  | 187109175  | BC079553 | RIKEN cDNA DK30037F22 gene                                                               |
| 255 | Dasm1          | NM_026102    | chr12 | 72932065   | 73093354*  | BC076585 | dishevelled associated activator of morphogenesis 1                                      |
| 256 | Dad1           | NM_010015    | chr12 | 54855160   | 54873589   | BC058116 | defender against cell death 1 (hypothetical protein LOC100044173)                        |
| 257 | Dak            | NM_145496    | chr19 | 10666887   | 10678748   | BC021917 | dihydroxyacetone kinase 2 homolog (yeast)                                                |
| 258 | Dape           | NM_008319    | chr16 | 83681996   | 83681996   | BC081623 | decapping enzyme, scavenger                                                              |
| 259 | Dhrf           | NM_010049    | chr13 | 93124738   | 93159008*  | BC005796 | dihydrofolate reductase                                                                  |
| 260 | Dhrs3          | NM_011303    | chr4  | 144482730  | 144518112* | BC010972 | dihydrogenase/reductase (SDR family) member 3                                            |
| 261 | Donson         | NM_021720    | chr16 | 91879510   | 91889998   | BC043316 | downstream neighbor of SON                                                               |
| 262 | Dp2            | NM_176247    | chr17 | 58326105   | 58353111   | BC053331 | Dip2p1-like protein                                                                      |
| 263 | Dullard        | NM_026017    | chr11 | 89794670   | 89804103   | BC018265 | Dullard homolog (Xenopus laevis)   similar to Dullard homolog (Xenopus laevis)           |
| 264 | Dync112        | NM_001013380 | chr8  | 106943029  | 106966905  | BC058645 | dynein, cytoplasmic 1 light intermediate chain 2                                         |
| 265 | Ebag9          | NM_019480    | chr15 | 44450859   | 44472573*  | BC118637 | estrogen receptor-binding fragment-associated gene 9                                     |
| 266 | Eea1           | NM_001019332 | chr10 | 95403297   | 95508156   | BC076537 | early endosome antigen 1                                                                 |
| 267 | Egfr           | NM_001065    | chr17 | 16622096   | 16812718   | AF278987 | epidermal growth factor receptor                                                         |
| 268 | Ehd1           | NM_010119    | chr19 | 6276734    | 6300096*   | BC043332 | EH-domain containing 1                                                                   |
| 269 | Elovl2         | NM_019423    | chr13 | 41277864   | 41315762   | BC089215 | elongation of very long chain fatty acids (FEN1/Elo2, SUR4/Elo3, yeast)-like 2           |
| 270 | ErbA4          | NM_010154    | chr16 | 68086625   | 69154330   | AF059177 | v-erb-a erythroblastic leukemia viral oncogene homolog 4 (avian)                         |
| 271 | Esco1          | NM_01081222  | chr10 | 10566800   | 106181070  | BC026201 | establishment of cohesion 1 homolog 1 (S. cerevisiae)                                    |
| 272 | Ella           | NM_145615    | chr9  | 55302315   | 55300050   | BC066645 | electron transferring flavoprotein, alpha polypeptide                                    |
| 273 | F2r            | NM_010169    | chr13 | 96371744   | 96388429   | BC031516 | coagulation factor II (fibrinogen) receptor                                              |
| 274 |                |              |       |            |            |          |                                                                                          |



|     |          |              |       |           |           |             |                                                                                                                                                                                                                        |
|-----|----------|--------------|-------|-----------|-----------|-------------|------------------------------------------------------------------------------------------------------------------------------------------------------------------------------------------------------------------------|
| 320 | Mifm1    | NM_172308    | chr10 | 6190430   | 6373423   | BC030437    | methyltetrahydrofolate dehydrogenase (NADP+ dependent) 1-like                                                                                                                                                          |
| 321 | Mimz2    | NM_023858    | chr9  | 13552854  | 13610925  | BC063950    | myotubularin related protein 2                                                                                                                                                                                         |
| 322 | Mkb1     | NM_038687    | chr1  | 52414720  | 52415628  | BC075386    | Npr-A binding protein 1                                                                                                                                                                                                |
| 323 | Nabp     | NM_019632    | chr2  | 14852037  | 148558203 | BC038362    | N-ethylmaleimide sensitive fusion protein attachment protein beta                                                                                                                                                      |
| 324 | Nek1     | NM_175089    | chr8  | 63471992  | 63610141  | AK173292    | NIMA (never in mitosis gene a)-related expressed kinase 1                                                                                                                                                              |
| 325 | Nyc      | NM_008692    | chr12 | 7866560   | 7868492   | BC088261    | nuclear transcription factor-Y gamma                                                                                                                                                                                   |
| 326 | Nin      | NM_023623    | chr6  | 104813277 | 104830555 | BC013914    | neuroulin (metalloproteinase M3 family)                                                                                                                                                                                |
| 327 | Nof1     | NM_00100421  | chr12 | 17355299  | 17436901  | BC066676    | nucleolar protein 10                                                                                                                                                                                                   |
| 328 | Npc2     | NM_023409    | chr12 | 86095507  | 86114062  | BC007190    | Niemann Pick type C2                                                                                                                                                                                                   |
| 329 | Nr6a1    | NM_010284    | chr2  | 38578980  | 38783208  | AF390896    | nuclear receptor subfamily 6, group A, member 1                                                                                                                                                                        |
| 330 | Nr6c3    | NM_178331    | chr10 | 86333750  | 86334750  | BC031583    | 5'-nucleotidase domain containing 3   cDNA sequence BC030307                                                                                                                                                           |
| 331 | Nudcd1   | NM_026149    | chr15 | 44206175  | 44259853  | BC031583    | NudC domain containing 1                                                                                                                                                                                               |
| 332 | Nup1     | NM_170591    | chr14 | 60838305  | 60870246  | BC026743    | nucleoporin like 1                                                                                                                                                                                                     |
| 333 | Osbp6    | NM_175489    | chr10 | 110601858 | 110734303 | +           | oxysterol binding protein-like 8                                                                                                                                                                                       |
| 334 | Pcyk1    | NM_023623    | chr6  | 104813277 | 104830555 | BC013914    | peroxylase oxidase 1                                                                                                                                                                                                   |
| 335 | Pcy1a    | NM_009981    | chr16 | 32431082  | 32472114  | U12895      | phosphate cytidyltransferase 1, choline, alpha isoform                                                                                                                                                                 |
| 336 | Pcd6     | NM_011051    | chr13 | 74440576  | 74454725  | BC040079    | programmed cell death 6                                                                                                                                                                                                |
| 337 | Pde4dip  | NM_001039376 | chr3  | 97493747  | 97692630  | BC060783    | phosphodiesterase 4D interacting protein (myomegalin)                                                                                                                                                                  |
| 338 | Pde6b    | NM_008601    | chr1  | 115894519 | 115975661 | BC063102    | phosphodiesterase 6D, cGMP-specific, rod, delta                                                                                                                                                                        |
| 339 | Pfkfb2   | NM_008825    | chr1  | 132585758 | 132612381 | BC018418    | P-3-phosphofructo-2-kinase/fructose-2,6-bisphosphatase 2                                                                                                                                                               |
| 340 | Pfnc3    |              | chr3  | 30798834  | 30799236  | BC050266    | polyhomote-like 3 (Drosophila)                                                                                                                                                                                         |
| 341 | Phldb2   | NM_153412    | chr16 | 45746356  | 45844491  | BC050915 AF | pleckstrin homology-like domain, family B, member 2                                                                                                                                                                    |
| 342 | Phr1     |              |       |           |           |             |                                                                                                                                                                                                                        |
| 343 | Picalm   | NM_146194    | chr7  | 97278742  | 97357442  | +           | BC025566 phosphatidylinositol binding clathrin assembly protein                                                                                                                                                        |
| 344 | Pik3c2a  | NM_011083    | chr7  | 123483075 | 123589692 | U55772      | phosphatidylinositol 3-kinase, C2 domain containing, alpha polypeptide                                                                                                                                                 |
| 345 | Pik3r1   | NM_001077495 | chr13 | 102450716 | 102538172 | BC026146    | phosphatidylinositol 3-kinase, regulatory subunit, polypeptide 1 (p85 alpha)                                                                                                                                           |
| 346 | Pik3r3   | NM_181585    | chr4  | 115894519 | 115975661 | BC063102    | phosphatidylinositol 3-kinase, regulatory subunit, polypeptide 3 (p85)                                                                                                                                                 |
| 347 | Piprac1  | NM_026149    | chr15 | 44206175  | 44259853  | +           | phosphatidylinositol transfer protein, cytoplasmic 1                                                                                                                                                                   |
| 348 | Pknox1   | NM_026361    | chr2  | 59990077  | 59193265  | +           | BC079648 plakophilin 4                                                                                                                                                                                                 |
| 349 | Plaa     | NM_172695    | chr4  | 94231830  | 94269942  | BC139773    | phospholipase A2, activating protein                                                                                                                                                                                   |
| 350 | Ppa1     | NM_026438    | chr10 | 61113369  | 61136916  | BC010468    | pyrophosphatase (manganic) 1                                                                                                                                                                                           |
| 351 | Ppara    | NM_035626    | chr11 | 103516626 | 103516626 | BC069493    | peroxisome proliferator activated receptor alpha                                                                                                                                                                       |
| 352 | Pp1b3    | NM_027351    | chr11 | 58487838  | 58502330  | BC061645    | phosphoryl isomerase (cyclophilin)-like 3                                                                                                                                                                              |
| 353 | Ppm1l    | NM_178726    | chr3  | 69120840  | 69359333  | BC069031    | protein phosphatase 1 (formerly 2C)-like                                                                                                                                                                               |
| 354 | Ppp2r5c  | NM_008913    | chr12 | 111685517 | 111685595 | AK129042    | protein phosphatase 2, regulatory subunit B (B56), gamma isoform                                                                                                                                                       |
| 355 | Ppp3ca   | NM_008913    | chr12 | 111685517 | 111685595 | BC069493    | protein phosphatase 3, catalytic subunit, alpha isoform                                                                                                                                                                |
| 356 | Prdx1    | NM_011034    | chr16 | 48218718  | 48219317  | +           | D16142 peroxiredoxin 1                                                                                                                                                                                                 |
| 357 | Prdx6    | NM_007453    | chr1  | 163170243 | 163181297 | AF093852    | peroxiredoxin 6                                                                                                                                                                                                        |
| 358 | PreA     | NM_028802    | chr2  | 132354819 | 132403966 | BC033408    | preimplantation protein 4                                                                                                                                                                                              |
| 359 | Prkca    | NM_011101    | chr11 | 107759481 | 106262542 | +           | protein kinase C, alpha                                                                                                                                                                                                |
| 360 | Prx1     | NM_038637    | chr1  | 19184548  | 19184548  | BC051411    | prospero-related homeobox 1                                                                                                                                                                                            |
| 361 | Psen1    | NM_008943    |       | 85029122  | 85076149  | +           | BC071233 presenilin 1                                                                                                                                                                                                  |
| 362 | Ptprg    | NM_008981    | chr14 | 12386526  | 13070443  | U09562      | protein tyrosine phosphatase, receptor type, G                                                                                                                                                                         |
| 363 | Pvrl1    | NM_021424    | chr9  | 43522659  | 43615554  | +           | poliovirus receptor-related 1                                                                                                                                                                                          |
| 364 | Pvpl     | NM_153741    | chr2  | 15861254  | 15863748  | BC035283    | prasin glycogen phosphorylase                                                                                                                                                                                          |
| 365 | Rab5a    | NM_025887    | chr17 | 53618559  | 53647005  | BC069648    | RAB5A, member RAS oncogene family                                                                                                                                                                                      |
| 366 | Rab5c    | NM_024456    | chr11 | 100576325 | 100599504 | BC029678    | RAB5C, member RAS oncogene family                                                                                                                                                                                      |
| 367 | Rap1     | NM_00104513  | chr1  | 60545154  | 60623613  | +           | Ras association (RalGDS/RAF-6) and pleckstrin homology domains 1                                                                                                                                                       |
| 368 | Rara     | NM_009024    | chr11 | 98799010  | 98836256  | BC040383    | retinoic acid receptor, alpha                                                                                                                                                                                          |
| 369 | Rbl1c1   | NM_009826    | chr1  | 6204743   | 6265566   | +           | AB070619 RB1-inducible coiled-coil 1                                                                                                                                                                                   |
| 370 | Rbed1    | NM_144917    | chr6  | 72515919  | 72548337  | BC016193    | RNA binding motif and ELMO domain 1                                                                                                                                                                                    |
| 371 | Rbm34    | NM_030243    | chr5  | 51779968  | 51790683  | BC033333    | RNA binding motif protein 43                                                                                                                                                                                           |
| 372 | Rbm47    | NM_178446    | chr11 | 665409841 | 665410781 | +           | RNA binding motif protein 47                                                                                                                                                                                           |
| 373 | Rbpi     |              | chr5  | 53946945  | 53948438  | +           | AY152894 recombination signal binding protein for immunoglobulin kappa J region                                                                                                                                        |
| 374 | Rcl1     | NM_021525    | chr19 | 29175865  | 29218419  | BC004574    | RNA terminal phosphate cyclase-like 1                                                                                                                                                                                  |
| 375 | Rel      | NM_009044    | chr11 | 23641729  | 23670790  | BC139770    | reticuloendotheliosis oncogene                                                                                                                                                                                         |
| 376 | Rer1     | NM_149615    | chr1  | 54300315  | 54300315  | BC031196    | RER1 like 1 (S. cerevisiae)                                                                                                                                                                                            |
| 377 | Rer1     | NM_026396    | chr4  | 154448221 | 154460406 | BC029189    | RER1 retention in endoplasmic reticulum 1 homolog (S. cerevisiae)                                                                                                                                                      |
| 378 | Rere     | NM_001085492 | chr4  | 149780449 | 149993598 | +           | BC110693 arginine glutamic acid dipeptide (RE) repeats                                                                                                                                                                 |
| 379 | Rhd3     | NM_028810    | chr2  | 50965959  | 51004831  | BC090902    | Rho family GTPase 3                                                                                                                                                                                                    |
| 380 | Rhsbk5a  | NM_153587    | chr12 | 101787868 | 101983238 | AY341873    | ribosomal protein S6 kinase, polypeptide 5                                                                                                                                                                             |
| 381 | Rhu1     | NM_009105    | chr2  | 12989595  | 13192559  | BC033827    | Ras suppressor protein 1                                                                                                                                                                                               |
| 382 | Saf2b    |              | chr17 | 56701848  | 56702273  | +           | scaffold attachment factor B2                                                                                                                                                                                          |
| 383 | Sarf3    | NM_016926    | chr5  | 114192453 | 114221658 | BC057156    | squamous cell carcinoma antigen recognized by T-cells 3                                                                                                                                                                |
| 384 | Scaper   | NM_00181341  | chr9  | 55398057  | 55767412  | +           | S phase cyclin A-associated protein in the ER                                                                                                                                                                          |
| 385 | Sec15a   | NM_133127    | chr1  | 93044483  | 93087597  | BC034649    | SEC15 homolog A (S. cerevisiae)                                                                                                                                                                                        |
| 386 | Seif1    | NM_001039089 | chr12 | 93044483  | 93087597  | +           | AF083095 sel-1 suppressor of lin-12-like (C. elegans)                                                                                                                                                                  |
| 387 | Seng5    | NM_177103    | chr16 | 31962592  | 32003257  | BC080830    | SUMO/sentrin specific peptidase 5                                                                                                                                                                                      |
| 388 | Sern1    | NM_019760    | chr10 | 57235580  | 57235310  | AF181685    | serine incorporator 1                                                                                                                                                                                                  |
| 389 | Sern2d   | NM_021374    | chr11 | 20434326  | 20533068  | BC014726    | SER1A domain containing 2                                                                                                                                                                                              |
| 390 | Sf3b2    | NM_030109    | chr19 | 5273932   | 5295448   | BC049118    | splicing factor 3b, subunit 2                                                                                                                                                                                          |
| 391 | Sfn      | NM_001013829 | chr2  | 122174628 | 122201643 | BC042839    | Sfn homology 2 domain containing F                                                                                                                                                                                     |
| 392 | Shoc2    | NM_019658    | chr19 | 54018796  | 54107621  | BC030360    | shc-2 (suppressor of clear homology) (C. elegans)                                                                                                                                                                      |
| 393 | Shc3p2   | NM_008693    | chr15 | 69895993  | 69929292  | AF381699    | shc3 carrier family 25, member 3f                                                                                                                                                                                      |
| 394 | Smad3    | NM_008539    | chr8  | 81862294  | 81923367  | BC058693    | MAD homolog 1 (Drosophila)                                                                                                                                                                                             |
| 395 | Smarca2  | NM_011164    | chr19 | 26679650  | 26682811  | +           | BC062541 SWI/SNF related, matrix associated, actin dependent regulator of chromatin, subfamily a, member 2                                                                                                             |
| 396 | Smchd1   | NM_028887    | chr17 | 11683336  | 11797867  | BC079641    | SMC hinge domain containing 1                                                                                                                                                                                          |
| 397 | Smurf2   | NM_009170    | chr11 | 108683070 | 108683070 | BC069456    | SMAD specific E3 ubiquitin protein ligase 2                                                                                                                                                                            |
| 398 | Snp70    | NM_009224    | chr7  | 52831824  | 52851083  | BC049128    | U1 small nuclear ribonucleoprotein polypeptide A                                                                                                                                                                       |
| 399 | Sp3      | NM_001018042 | chr2  | 72774487  | 72819076  | BC079874    | trans-acting transcription factor 3   RIKEN cDNA D130067C23 gene                                                                                                                                                       |
| 400 | Spag9    | NM_027569    | chr11 | 93857405  | 93967694  | +           | BC094670 sperm associated antigen 9                                                                                                                                                                                    |
| 401 | Sp4b     |              |       |           |           |             |                                                                                                                                                                                                                        |
| 402 | Slam     | NM_011484    | chr2  | 13995739  | 14009965  | +           | BC044666 signal transducing adaptor molecule (SH3 domain and ITAM motif) 1                                                                                                                                             |
| 403 | Slard4   | NM_133774    | chr18 | 33361075  | 33373470  | BC005642    | SLAR-related lipid transfer (START) domain containing 4                                                                                                                                                                |
| 404 | Slk25    | NM_021537    | chr1  | 95517328  | 95532304  | BC071218    | serine/threonine kinase 25 (yeast)                                                                                                                                                                                     |
| 405 | Slk39    | NM_016886    | chr2  | 68448002  | 68310325  | BC051964    | serine/threonine kinase 39, STE20/SPS1 homolog (yeast)                                                                                                                                                                 |
| 406 | Slsap5   | NM_001018144 | chr10 | 96324811  | 96324811  | +           | serpina binding protein 5 (human)                                                                                                                                                                                      |
| 407 | Sudc2    | NM_011507    | chr6  | 95423006  | 95668792  | BC080781    | succinate-Coenzyme A ligase, GDP-forming, beta subunit                                                                                                                                                                 |
| 408 | Surf1    | NM_013677    | chr2  | 26789903  | 26772050  | BC052900    | surfeit gene 1                                                                                                                                                                                                         |
| 409 | Tair2    | NM_001081288 | chr15 | 54853758  | 54903494  | +           | TAI2 RNA polymerase II, TATA box binding protein (TBP)-associated factor                                                                                                                                               |
| 410 | Taf5     | NM_032749    | chr15 | 98373223  | 98373223  | BC090456    | TAI3 RNA polymerase II, TATA box binding protein (TBP)-associated factor                                                                                                                                               |
| 411 | Tars     | NM_033074    | chr15 | 11313418  | 11329413  | BC055371    | threonyl-tRNA synthetase                                                                                                                                                                                               |
| 412 | Tbc1d22a | NM_145476    | chr15 | 86044889  | 86328933  | +           | BC066009 TBC1 domain family, member 22a                                                                                                                                                                                |
| 413 | Tbctd5   | NM_028162    | chr17 | 50751039  | 51318660  | AK220251    | TBC1 domain family, member 5                                                                                                                                                                                           |
| 414 | Tm6c23   | NM_011889    | chr1  | 174074803 | 174074803 | BC034377    | translocase of inner mitochondrial membrane 23 homolog (yeast)   similar to Translocase of inner mitochondrial membrane 23 homolog (yeast)   similar to Translocase of inner mitochondrial membrane 23 homolog (yeast) |
| 415 | Tlet1    | NM_011599    | chr4  | 71778176  | 71861896  | BC055753    | transducin-like enhancer of split 1, homolog of Drosophila Elps1                                                                                                                                                       |
| 416 | Tlk2     | NM_00112705  | chr11 | 10540121  | 105143490 | +           | AF045262 toussled-like kinase 2 (Arabidopsis)                                                                                                                                                                          |
| 417 | Tmrc4    | NM_029857    | chr4  | 138528807 | 138615082 | BC013477    | transmembrane and coiled-coil domains 4                                                                                                                                                                                |
| 418 | Tmrc6b   | NM_143478    | chr15 | 80717143  | 80717143  | BC038158    | nucleotide repeat containing 6b                                                                                                                                                                                        |
| 419 | Tob2     | NM_020507    | chr15 | 81678700  | 81689226  | AK122537    | transducer of ERBB2, 2                                                                                                                                                                                                 |
| 420 | Tp52     | NM_00102561  | chr3  | 8929436   | 9004515   | AY048852    | tumor protein D52                                                                                                                                                                                                      |
| 421 | Tp1      | NM_009415    | chr6  | 124760733 | 124764430 | BC046761    | inosophosphate isomerase 1                                                                                                                                                                                             |
| 422 | Tpp2     | NM_009418    | chr11 | 43990847  | 44059444  | +           | X81323 tripeptidyl peptidase II                                                                                                                                                                                        |
| 423 | Tfam2    | NM_177409    | chr1  | 20991459  | 21069330  | BC018212    | translocating chain-associating membrane protein 2                                                                                                                                                                     |
| 424 | Trib1    | NM_144549    | chr15 | 59480209  | 59488654  | +           | BC060800 tribbles homolog 1 (Drosophila)                                                                                                                                                                               |
| 425 | Trib3    | NM_024468    | chr17 | 36395817  | 36408949  | AB046382    | tribbles homolog 3                                                                                                                                                                                                     |
| 426 | Trib4    | NM_145377    | chr11 | 48619906  | 48630855  | BC020156    | tribbles homolog 4                                                                                                                                                                                                     |
| 427 | Trip2    | NM_133736    | chr1  | 184339286 | 18438267  | BC026274    | tripartite motif-containing 4   similar to tripartite motif-containing 4   similar to tripartite motif-containing 4                                                                                                    |
| 428 | Trip3    | NM_021897    | chr4  | 11083588  | 11101526  | +           | AY034611 transformation related protein 53 inducible nuclear protein 1                                                                                                                                                 |
| 429 | Trip4ap  | NM_019828    | chr2  | 155460013 | 155518096 | AF596881    | transient receptor potential cation channel, subfamily C, member 4 associated protein                                                                                                                                  |
| 430 | Tspan9   | NM_175414    | chr6  | 127911418 | 128093596 | BC052503    | tetraspanin 9                                                                                                                                                                                                          |
| 431 | Ttc1     | NM_028639    | chr17 | 87882226  | 87781090  | BC042512    | tetratricopeptide repeat domain 7                                                                                                                                                                                      |
| 432 | Tubcp2   | NM_133755    | chr7  | 147181895 | 147222165 | BC012519    | tubulin, gamma complex associated protein 2                                                                                                                                                                            |
| 433 | Tyk2     | NM_018793    | chr9  | 20908518  | 20935654  | BC094240    | tyrosine kinase 2                                                                                                                                                                                                      |
| 434 | Ube2n    | NM_005960    | chr10 | 94977796  | 95008292  | BC067069    | ubiquitin-conjugating enzyme E2N                                                                                                                                                                                       |
| 435 | Ufm1     | NM_028435    | chr3  | 9389134   | 9389134   | BC081065    | ubiquitin-fold modifier 1                                                                                                                                                                                              |
| 436 | Usp53    | NM_133857    | chr3  | 122836519 | 122887365 | BC132339    | ubiquitin specific peptidase 53                                                                                                                                                                                        |
| 437 | Vdac1    | NM_011694    | chr11 | 52174617  | 52202899  | +           | U0840 voltage-dependent anion channel 1                                                                                                                                                                                |
| 438 | Vps4b    | NM_009190    | chr1  | 109866015 | 109893253 | U101118     | vacuolar protein sorting 4b (yeast)                                                                                                                                                                                    |
| 439 | Vps53    | NM_028654    | chr11 | 75891728  | 75931332  | BC034377    | vacuolar protein sorting 53 (yeast)                                                                                                                                                                                    |
| 440 | Was2     | NM_153423    | chr4  | 132686493 | 132755644 | AY135643    | WAS protein family, member 2                                                                                                                                                                                           |
| 441 | Wdfy3    |              | chr5  | 102261975 | 102263755 | +           | AB093277 WD repeat and FYVE domain containing 3                                                                                                                                                                        |
| 442 | Wdr5     | NM_080848    | chr2  | 27249699  | 27320555  | +           | BC025801 WD repeat domain 5                                                                                                                                                                                            |
| 443 | Wnt5c11  | NM_001081269 | chr8  | 26712776  | 26824872  | +           | BC034447 Wnt5c11 homolog 11, human                                                                                                                                                                                     |
| 444 | Wnk1     | NM_158703    | chr15 | 118973989 | 119686256 | +           | AY309076 WNK (lysine deficient protein kinase 1)                                                                                                                                                                       |
| 445 | Wn       | NM_011721    | chr18 | 34344845  | 34496352  | BC050921    | Werner syndrome homolog (human)                                                                                                                                                                                        |
| 446 | Wwr1     | NM_133784    | chr3  | 57259571  | 57379802  | BC014727    | WW domain containing transcription regulator 1                                                                                                                                                                         |
| 447 | Zfp97    | NM_146253    | chr2  | 37282365  | 37286499  | BC032933    | zinc finger and B1B domain containing 6   predicted gene, ENSMUSG0000066798                                                                                                                                            |
| 448 | Zfp97    | NM_146253    | chr2  | 37282365  | 37286499  | +           | AK047968 zinc finger, DHHC domain containing 20                                                                                                                                                                        |
| 449 | Zeb2     | NM_015753    | chr2  | 44839252  | 44968744  | BC060699    | zinc finger E-box binding homeobox 2                                                                                                                                                                                   |
| 450 | Zfand3   | NM_148926    | chr17 | 30142032  | 30346967  | +           | BC083124 zinc finger, AN1-type domain 3                                                                                                                                                                                |
| 451 | Zfp1     |              |       |           |           |             |                                                                                                                                                                                                                        |
|     |          |              |       |           |           |             |                                                                                                                                                                                                                        |

| Table S4 | Gene symbol        | Refseq ID | Chromosome | Start Position | End Position | Strand | Genbank ID   | Gene Description                                                                                  |
|----------|--------------------|-----------|------------|----------------|--------------|--------|--------------|---------------------------------------------------------------------------------------------------|
| 1        | Z310047O13Rik      | NM_024185 | chr2       | 12268891       | 12341087     |        | BC027202     | RIKEN cDNA 2310047O13 gene                                                                        |
| 2        | Z610101N10Rik      | NM_011149 | chr2       | 95360821       | 95412415     |        | BC068265     | RIKEN cDNA 2610101N10 gene                                                                        |
| 3        | R0303612M13Rik     | NM_172458 | chr17      | 32938181       | 32924492     |        | BC043671     | RIKEN cDNA 9030612M13 gene                                                                        |
| 4        | R230087O21Rik      | NM_021033 | chr2       | 146086112      | 146337742    |        | BC053894     | RIKEN cDNA 230087O21 gene                                                                         |
| 5        | A530082C11Rik      | NM_177186 | chr4       | 154975525      | 154997449    | +      | BC058728     | RIKEN cDNA A530082C11 gene                                                                        |
| 6        | Abi1               | NM_001077 | chr2       | 22805705       | 22895585     |        | AF420251     | abi-interactor 1                                                                                  |
| 7        | Acly               | NM_134037 | chr11      | 100337670      | 100389215    |        | BC056378     | ATP citrate lyase                                                                                 |
| 8        | Actn1              | NM_134156 | chr12      | 81268532       | 81361303     |        | BC054830     | actinin, alpha 1                                                                                  |
| 9        | Adfp               | NM_007408 | chr4       | 86302469       | 86315963     |        | M93275       | adipose differentiation related protein                                                           |
| 10       | Agl                | NM_001081 | chr3       | 116445869      | 116513327    |        | BC044780     | amlyo-1,6-galactosidase, 4-alpha-galactanotransferase                                             |
| 11       | Afcy               | NM_018661 | chr2       | 154885048      | 154900169    |        | BC058671     | S-adenosylhomocysteine hydrolase                                                                  |
| 12       | Ak3                | NM_021299 | chr19      | 29095322       | 29122445     |        | BC058191     | adenylate kinase 3                                                                                |
| 13       | Alas1              | NM_020559 | chr9       | 106136258      | 106150187    |        | BC022110     | aminolevulinic acid synthase 1                                                                    |
| 14       | Alcam              | NM_009655 | chr16      | 52251003       | 52454187     |        | BC027280     | activated leukocyte cell adhesion molecule                                                        |
| 15       | Ankrd17            | NM_030886 | chr5       | 90656191       | 90795990     |        | AF130371     | ankyrin repeat domain 17                                                                          |
| 16       | Arhgap12           | NM_001039 | chr18      | 6024446        | 6136096      |        | BC024633     | Rho GTPase activating protein 12                                                                  |
| 17       | Atp9v1e1           | NM_007610 | chr6       | 120745262      | 120772719    |        | BC003421     | VATPase, H+ transporting, lysosomal V1 subunit E1                                                 |
| 18       | Atxn2l             | NM_183020 | chr7       | 133635222      | 133646818    |        | BC054483     | ataxin 2-like                                                                                     |
| 19       | Baga4              | NM_026121 | chr8       | 26875008       | 26895681     |        | AF323863     | BCL2-associated athanogene 4                                                                      |
| 20       | Bst2               | NM_198095 | chr8       | 74057851       | 74061336     |        | BC087949     | bone marrow stromal cell antigen 2                                                                |
| 21       | Cdc37l1            | NM_025960 | chr19      | 29064857       | 29092061     |        | BC031761     | cell division cycle 37 homolog (S. cerevisiae)-like 1                                             |
| 22       | Chchd4             | NM_133928 | chr6       | 91414270       | 91423417     |        | BC019405     | coiled-coil-helix-coiled-coil-helix domain containing 4                                           |
| 23       | Chmp7              | NM_134078 | chr14      | 70116807       | 70132348     |        | BC033365     | CHMP family, member 7                                                                             |
| 24       | Clic               | NM_010039 | chr11      | 86508153       | 86578994     |        | BC079887     | clathrin, heavy polypeptide (Hc)                                                                  |
| 25       | Cmim8              | NM_027294 | chr9       | 114698463      | 114753270    |        | AY243513     | CKLF-like MARVEL transmembrane domain containing 8                                                |
| 26       | Cnot4              | NM_016877 | chr6       | 34972065       | 35083715     |        | BC058778     | CCR4-NOT transcription complex, subunit 4                                                         |
| 27       | Cobl1              | NM_177025 | chr2       | 64926408       | 65077460     |        | AY308746     | Cobl-like 1                                                                                       |
| 28       | Cs                 | NM_026444 | chr10      | 12774873       | 127798535    | +      | BC029754     | citrate synthase                                                                                  |
| 29       | Csnk1a1            | NM_146087 | chr18      | 61714867       | 61748228     | +      | BC019740     | casein kinase 1, alpha 1                                                                          |
| 30       | Ctagse5            | NM_146034 | chr12      | 60230733       | 60281163     | +      | BC036884     | C-TAGE family, member 5                                                                           |
| 31       | Cttn               | NM_007803 | chr7       | 151621629      | 151656642    |        | U01384       | cortactin                                                                                         |
| 32       | Dad1 LOC100044173  | NM_010015 | chr14      | 54855160       | 54873589     |        | BC058116     | defender against cell death 1   hypothetical protein LOC100044173                                 |
| 33       | Dhdh               | NM_027903 | chr7       | 52728933       | 52744166     |        | BC116414     | dihydrodiol dehydrogenase (dimeric)                                                               |
| 34       | Dhrf               | NM_010049 | chr13      | 93124738       | 93195908     |        | BC005796     | dihydrofolate reductase                                                                           |
| 35       | Dhrs3              | NM_011303 | chr4       | 144482730      | 144518112    | +      | BC010972     | dehydrogenase/reductase (SDR family) member 3                                                     |
| 36       | Dhx36              | NM_028136 | chr3       | 62274005       | 62310910     |        | AF448804     | DEAH (Asp-Glu-Ala-His) box polypeptide 36                                                         |
| 37       | Dnaj1              | NM_008298 | chr4       | 40669566       | 40681997     | +      | AF055664     | Dnaj (Hsp40) homolog, subfamily A, member 1                                                       |
| 38       | Dpp9               | NM_172624 | chr17      | 56326105       | 56358311     |        | BC057631     | dipeptidylpeptidase 9                                                                             |
| 39       | Dynl1l2            | NM_026556 | chr11      | 87793027       | 87801007     |        | BC040822     | dynein light chain LC8-type 2                                                                     |
| 40       | Egln2              | NM_053208 | chr7       | 27943677       | 27951792     |        | AF453879     | EGL nine homolog 2 (C. elegans)                                                                   |
| 41       | Eif1a              | NM_010120 | chr18      | 46757358       | 46769862     | +      | AF026481     | eukaryotic translation initiation factor 1A                                                       |
| 42       | Eif2h              | NM_025794 | chr3       | 79407723       | 79432642     |        | BC057670     | electron transferring flavoprotein, dehydrogenase                                                 |
| 43       | Er                 | NM_010169 | chr3       | 96371744       | 96383429     |        | BC033642     | coagulation factor II (thrombin) receptor                                                         |
| 44       | Fbxl20             | NM_028149 | chr11      | 97943868       | 98010930     |        | EF649694     | F-box and leucine-rich repeat protein 20                                                          |
| 45       | Fbxl3              | NM_015822 | chr14      | 103479456      | 103498735    |        | BC067203     | F-box and leucine-rich repeat protein 3                                                           |
| 46       | Fech               | NM_007998 | chr18      | 64616202       | 64648720     |        | BC006746     | ferrochelatase                                                                                    |
| 47       | Gch1               | NM_008102 | chr14      | 47773570       | 47809081     |        | BC005643     | GTP cyclohydrolase 1                                                                              |
| 48       | Gss                | NM_008180 | chr2       | 155388917      | 155418448    |        | U35456       | glutathione synthetase                                                                            |
| 49       | GTF2I              | NM_133861 | chr17      | 57148225       | 57153941     |        | BC031123     | general transcription factor IIF, polypeptide 1                                                   |
| 50       | Hexim1             | NM_138753 | chr11      | 102977839      | 102981039    | +      | AY009614     | hexamethylene bis-acetamide inducible 1                                                           |
| 51       | Hspa4              | NM_008300 | chr11      | 53073316       | 53113981     |        | BC003770     | heat shock protein 4                                                                              |
| 52       | Igf1               | NM_010512 | chr10      | 87321813       | 87394870     | +      | BC012409     | insulin-like growth factor 1                                                                      |
| 53       | Itpa               | NM_025922 | chr2       | 130493543      | 130507350    | +      | BC094466     | inosine triphosphatase (nucleoside triphosphate pyrophosphatase)                                  |
| 54       | Klf9 Z310051E17Rik | NM_010638 | chr19      | 23215716       | 23241401     | +      | Y14296       | Kruppel-like factor 9   RIKEN cDNA Z310051E17 gene                                                |
| 55       | Lasp1              | NM_010688 | chr11      | 97609896       | 97700078     | +      | BC010840     | LIM and SH3 protein 1                                                                             |
| 56       | Lymr4              | NM_201358 | chr13      | 36070866       | 36209226     |        | BC034664     | L'YR motif containing 4                                                                           |
| 57       | Map3k1             | NM_011945 | chr13      | 112536641      | 112599191    |        | AF117340     | mitogen-activated protein kinase kinase kinase 1                                                  |
| 58       | Med8               | NM_020000 | chr4       | 118081942      | 118088387    | +      | BC021870     | mediator of RNA polymerase II transcription, subunit 8 homolog (yeast)                            |
| 59       | Mef2a              | NM_001033 | chr7       | 74376970       | 74517744     |        | BC096598     | myocyte enhancer factor 2A                                                                        |
| 60       | Mif                | NM_011131 | chr6       | 97757178       | 97968701     | +      | BC108976     | microphthalmia-associated transcription factor                                                    |
| 61       | Morf4l1            | NM_010391 | chr9       | 89986507       | 90009600     |        | AF319621     | mortality factor 4 like 1                                                                         |
| 62       | Mrf1f5             | NM_025300 | chr1       | 47633290       | 47787911     |        | BC027233     | mitochondrial ribosomal protein L15                                                               |
| 63       | Mthfd1l            | NM_172308 | chr10      | 6190430        | 6373423      |        | BC030437     | methylentetrahydrofolate dehydrogenase (NADP+ dependent) 1-like                                   |
| 64       | Mtmr2              | NM_023858 | chr9       | 13552854       | 13610925     | +      | BC063050     | myotubularin related protein 2                                                                    |
| 65       | Nab1               | NM_008667 | chr1       | 52514720       | 52557292     |        | BC016886     | Ngfi-A binding protein 1                                                                          |
| 66       | Ncl                | NM_010880 | chr1       | 88255651       | 88256536     | +      |              | nuclolin                                                                                          |
| 67       | Nr1a1              | NM_010264 | chr2       | 38578890       | 38783208     |        | AF390896     | nuclear receptor subfamily 6, group A, member 1                                                   |
| 68       | Phleb2             | NM_153412 | chr16      | 45746356       | 45844491     |        | BC050915/AF3 | pleckstrin homology-like domain, family B, member 2                                               |
| 69       | Pik3r1             | NM_001074 | chr13      | 102450716      | 102538172    |        | BC028146     | phosphatidylinositol 3-kinase, regulatory subunit, polypeptide 1 (p85 alpha)                      |
| 70       | Pilpnc1            | NM_145823 | chr11      | 107069206      | 107333034    |        | AB077281     | phosphatidylinositol transfer protein, cytoplasmic 1                                              |
| 71       | Ppa1               | NM_026438 | chr10      | 61111369       | 61136916     | +      | BC010468     | pyrophosphatase (inorganic) 1                                                                     |
| 72       | Ppara              | NM_011144 | chr15      | 85566206       | 85633249     | +      | BC016892     | peroxisome proliferator activated receptor, alpha                                                 |
| 73       | Ppp3ca             | NM_008913 | chr3       | 136333734      | 136600350    | +      | Y05479       | protein phosphatase 3, catalytic subunit, alpha isoform                                           |
| 74       | Pqic2              | NM_145384 | chr4       | 138849445      | 138866600    |        | BC019216     | PQ loop repeat containing 2                                                                       |
| 75       | Prdh6              | NM_007453 | chr1       | 163117043      | 163112943    |        | AF093852     | preproliferating cell nuclear antigen 6                                                           |
| 76       | Pre4               | NM_028802 | chr2       | 132354819      | 132403886    |        | BC033408     | preimplantation protein 4                                                                         |
| 77       | Psmd8              | NM_026545 | chr7       | 29959271       | 29995550     |        | BC004075     | proteasome (prosome, macropain) 26S subunit, non-ATPase, 8                                        |
| 78       | Rab5a              | NM_025887 | chr17      | 53618559       | 53647005     | +      | BC096481     | RAB5A, member RAS oncogene family                                                                 |
| 79       | Rb1cc1             | NM_009826 | chr1       | 6204743        | 6265656      | +      | AB070619     | RB1-inducible coiled-coil 1                                                                       |
| 80       | Rbm43              | NM_030243 | chr2       | 51779968       | 51790683     |        | BC003333     | RNA binding motif protein 43                                                                      |
| 81       | Rbpj               | NM_009035 | chr5       | 53980524       | 54047374     | +      | BC051387     | recombination signal binding protein for immunoglobulin kappa J region                            |
| 82       | Rbms               | NM_019730 | chr6       | 34993116       | 35040313     |        | BC030397     | RNA binding protein gene with multiple repeats                                                    |
| 83       | Rcd1               | NM_021525 | chr19      | 29175865       | 29182419     |        | BC004574     | RNA terminal phosphate cyclase-like 1                                                             |
| 84       | Rel1               | NM_145923 | chr5       | 64300315       | 64360115     |        | BC031198     | REL1-like 1                                                                                       |
| 85       | Rfxank             | NM_011266 | chr8       | 72654705       | 72663096     |        | BC010971     | regulatory factor X-associated ankyrin-containing protein                                         |
| 86       | Rpia               | NM_009075 | chr6       | 70715695       | 70742169     |        | L30334       | ribose 5-phosphate isomerase A                                                                    |
| 87       | Rpl22 mcCG_130059  | NM_009079 | chr4       | 15169835       | 151708180    |        | BC021344     | ribosomal protein L22   ribosomal protein L22 pseudogene                                          |
| 88       | Scaper             | NM_001081 | chr9       | 55398057       | 55767412     |        |              | S phase cyclin A-associated protein in the ER                                                     |
| 89       | Sdc4               | NM_011521 | chr2       | 164249747      | 164286888    |        | D89571       | syndecan 4                                                                                        |
| 90       | Semp5              | NM_177103 | chr16      | 31962592       | 32003257     |        | BC080830     | SUMO/sentrin specific peptidase 5                                                                 |
| 91       | Smarca2            | NM_011416 | chr19      | 26679850       | 26852811     | +      | BC075641     | SWI/SNF related, matrix associated, actin dependent regulator of chromatin, subfamily a, member 2 |
| 92       | Spag9              | NM_027569 | chr11      | 93857405       | 93987894     | +      | BC094670     | sperm associated antigen 9                                                                        |
| 93       | Slit3              | NM_133726 | chr15      | 81195470       | 81230124     |        | BC003843     | suppression of tumorigenicity 13                                                                  |
| 94       | Slam               | NM_011484 | chr18      | 13995739       | 14069665     | +      | BC044666     | signal transducing adaptor molecule (SH3 domain and ITAM motif) 1                                 |
| 95       | Star4              | NM_133774 | chr18      | 33361078       | 33373470     |        | BC003642     | STAR-related lipid transfer (STAR1) domain containing 4                                           |
| 96       | Stk24              | NM_145465 | chr14      | 121685563      | 121778455    |        | AY188357     | serine/threonine kinase 24 (STE20 homolog, yeast)                                                 |
| 97       | Tars               | NM_033074 | chr15      | 11313418       | 11329413     |        | BC055371     | threonyl-tRNA synthetase                                                                          |
| 98       | Tex2               | NM_198292 | chr11      | 106363448      | 106474244    |        | BC057406     | testis expressed gene 2                                                                           |
| 99       | Tie1               | NM_011599 | chr4       | 71778176       | 71861896     |        | BC057573     | transducin-like enhancer of split 1, homolog of Drosophila E(spl)                                 |
| 100      | Tm6sf3             | NM_026281 | chr6       | 146552011      | 146583022    |        | DC1014329    | transmembrane / superfamily member 3                                                              |
| 101      | Tmem33             | NM_028975 | chr5       | 67651891       | 6782700      |        | BC018570     | transmembrane protein 33                                                                          |
| 102      | Tnfr6b             | NM_144812 | chr15      | 80541743       | 80771516     |        | BC088158     | truncleotide repeat containing 6b                                                                 |
| 103      | Tob2               | NM_020507 | chr15      | 81678700       | 81689226     |        | AK122537     | transducer of ERBB2, 2                                                                            |
| 104      | Tpd52              | NM_001025 | chr3       | 8929436        | 9004515      |        | AY048852     | tumor protein D52                                                                                 |
| 105      | Tpi1               | NM_009415 | chr6       | 124760733      | 124764430    |        | BC046761     | triosephosphate isomerase 1                                                                       |
| 106      | Tspan9             | NM_175414 | chr6       | 127911418      | 128093596    |        | BC052503     | tetraspanin 9                                                                                     |
| 107      | Tubbe              | NM_026473 | chr18      | 67593373       | 67562403     | +      | BC006225     | tubulin, beta 6                                                                                   |
| 108      | Tubgc2             | NM_133765 | chr7       | 147181895      | 147222165    |        | BC012519     | tubulin, gamma complex associated protein 2                                                       |
| 109      | Ube2b              | NM_009458 | chr11      | 51799064       | 51813889     |        | U57690       | ubiquitin-conjugating enzyme E2B, RAD6 homolog (S. cerevisiae)                                    |
| 110      | Ube2e2             | NM_144839 | chr14      | 19406091       | 19726141     |        | BC016265     | ubiquitin-conjugating enzyme E2E 2 (UBC4/6 homolog, yeast)                                        |
| 111      | Ube2n              | NM_080560 | chr10      | 94977796       | 95008292     | +      | BC067069     | ubiquitin-conjugating enzyme E2N                                                                  |
| 112      | Usp32              | NM_010299 | chr11      | 84797992       | 84917463     |        |              | ubiquitin specific peptidase 32                                                                   |
| 113      | Vps4b              | NM_009190 | chr1       | 108666015      | 108693253    |        | U10119       | vacuolar protein sorting 4b (yeast)                                                               |
| 114      | Wwrt1              | NM_133784 | chr3       | 57239571       | 57378802     |        | BC014727     | WW domain containing transcription regulator 1                                                    |
| 115      | Ype5               | NM_027166 | chr17      | 73186044       | 73200535     | +      | BC085109     | yippee-like 5 (Drosophila)                                                                        |
| 116      | Zdhc20             | NM_029492 | chr14      | 58451539       | 58509116     |        | BC019536     | zinc finger, D2HC domain containing 20                                                            |
| 117      | Zfand3             | NM_148926 | chr17      | 30142032       | 30346967     | +      | BC083124     | zinc finger, AN1-type domain 3                                                                    |
| 118      | Zfp707             | NM_010810 | chr15      | 75799649       | 75806176     | +      | BC026404     | zinc finger protein 707                                                                           |
| 119      | Zh2c2              | NM_026250 | chr1       | 99666772       | 99690285     | +      | BC033572     | zinc finger, H2C2 domain containing                                                               |

Table S5

| Functional Categories                                               |       |            |            |                                                                                                                                                                                                                                                                                                                                                                                                                                                                                                                                                                                               |            |          |           |                 |            |            |            |  |  |
|---------------------------------------------------------------------|-------|------------|------------|-----------------------------------------------------------------------------------------------------------------------------------------------------------------------------------------------------------------------------------------------------------------------------------------------------------------------------------------------------------------------------------------------------------------------------------------------------------------------------------------------------------------------------------------------------------------------------------------------|------------|----------|-----------|-----------------|------------|------------|------------|--|--|
| Term                                                                | Count | %          | PValue     | Genes                                                                                                                                                                                                                                                                                                                                                                                                                                                                                                                                                                                         | List Total | Pop Hits | Pop Total | Fold Enrichment | Bonferroni | Benjamini  | FDR        |  |  |
| acetylation                                                         |       |            |            | MORF4L1, MEF2A, Z610101N10R1K, AHCY, AB1I, CLTC, MTHFD1L, GSS, CTNN, TP11, ATXN2L, DYNLL2, HEXIM1, MAP3K1, DNAAJ1, DAD1, ETFDH, HSPA4, DHX36, DPP9, PIK3R1, CSNK1A1, CS, AK3, ACTN1, ACY, TUBGCP2, NCL, PPA1, UBE2N, SPAG9, TAR, ITPA, PRDX6, LASP1, ATP6V1E1, GTF2F1, RAB5A, SMARCA2                                                                                                                                                                                                                                                                                                         | 108        | 2325     | 17854     | 2.7730227       | 4.36E-07   | 4.36E-07   | 2.98E-06   |  |  |
| cytoplasm                                                           | 39    | 34.8214286 | 2.42E-09   | AHCY, CHMP7, EGLN2, AB1I, RFXANK, CNOT4, GCH1, MTR2, ANKRD17, BAG4, CTNN, DYNLL2, HEXIM1, RB1CC1, PITPNC1, HSPA4, STAM, DPP9, TNRC6B, CDC37L1, CSNK1A1, FBXL20, STK24, ACTN1, ACY, TUBGCP2, TLE1, WWTR1, TUBGCP2, NCL, PPA1, ST13, SPAG9, TAR, RBPMS, ITPA, PRDX6, LASP1, PHLD2, FBXL3                                                                                                                                                                                                                                                                                                        | 108        | 3029     | 17854     | 2.12851693      | 5.02E-04   | 2.51E-04   | 0.00343407 |  |  |
| phosphoprotein                                                      | 39    | 34.8214286 | 2.79E-06   | Z610101N10R1K, MEF2A, MITF, CHMP7, CLTC, SDC4, TPD52, RFXANK, RELL1, ARHGAP12, CNOT4, ANKRD17, CTAGE5, CTNN, VPS4B, TUBB6, PITPNC1, STAM, FBXL20, STK24, ACTN1, TLE1, NCL, ST13, TAR, SPAG9, RBPMS, PRDX6, MED8, NAB1, RAB5A, SMARCA2, AB1I, GCH1, MTR2, TP11, ATXN2L, HEXIM1, MAP3K1, RB1CC1, DNAAJ1, HSPA4, PPP3CA, TNRC6B, ZDHHC20, CDC37L1, PIK3R1, COBL1, CSNK1A1, ACY, WWTR1, TUBGCP2, TEX2, LASP1, ATP6V1E1, GTF2F1, PHLD2, UBE2E2, TOB2                                                                                                                                               | 108        | 6311     | 17854     | 1.54548789      | 0.00874265 | 0.00292275 | 0.06007137 |  |  |
| one-carbon metabolism                                               | 59    | 52.6785714 | 4.88E-05   | AHCY, DHFR, MTHFD1L                                                                                                                                                                                                                                                                                                                                                                                                                                                                                                                                                                           | 108        | 15       | 17854     | 33.062963       | 0.47284405 | 0.14791136 | 4.26872761 |  |  |
| transcription regulation                                            | 3     | 2.67857143 | 0.00355088 | MORF4L1, PPARA, MEF2A, KLF9, NR6A1, MITF, TLE1, WWTR1, NCL, RFXANK, CNOT4, RBPMS, HEXIM1, MED8, RB1CC1, GTF2F1, NAB1, RBPJ, SMARCA2                                                                                                                                                                                                                                                                                                                                                                                                                                                           | 108        | 1546     | 17854     | 2.03168272      | 0.56849056 | 0.15472493 | 5.58908267 |  |  |
| sh3 domain                                                          | 19    | 16.9642857 | 0.00465837 | CTNN, LASP1, AB1I, STAM, PIK3R1, ARHGAP12                                                                                                                                                                                                                                                                                                                                                                                                                                                                                                                                                     | 108        | 204      | 17854     | 4.86220044      | 0.75116952 | 0.20691951 | 9.07956635 |  |  |
| ligase                                                              | 7     | 6.25       | 0.00802582 | UBE2N, GSS, TAR, UBE2B, UBE2E2, MTHFD1L, CNOT4                                                                                                                                                                                                                                                                                                                                                                                                                                                                                                                                                | 108        | 290      | 17854     | 3.9903576       | 0.76554134 | 0.18715176 | 9.44898049 |  |  |
| coiled coil                                                         |       |            |            | Z610101N10R1K, BST2, CHMP7, AB1I, WWTR1, TPD52, RELL1, CNOT4, ANKRD17, SPAG9, CTAGE5, HEXIM1, MED8, RB1CC1, VPS4B, DHX36, TNRC6B, PHLD2, CDC37L1                                                                                                                                                                                                                                                                                                                                                                                                                                              | 108        | 1732     | 17854     | 1.8134997       | 0.92648468 | 0.27839883 | 16.3577492 |  |  |
| nucleotide-binding                                                  | 19    | 16.9642857 | 0.01439681 | CSNK1A1, STK24, AK3, ACY, UBE2B, MTHFD1L, GCH1, GSS, UBE2N, TAR, MAP3K1, RAB5A, VPS4B, TUBB6, DHX36, HSPA4, SMARCA2, UBE2E2                                                                                                                                                                                                                                                                                                                                                                                                                                                                   | 108        | 1631     | 17854     | 1.82444308      | 0.95353878 | 0.28895193 | 18.9433975 |  |  |
| Transcription                                                       | 18    | 16.0714286 | 0.01690622 | MORF4L1, PPARA, MEF2A, KLF9, NR6A1, MITF, TLE1, ZFP707, WWTR1, RFXANK, CNOT4, RBPMS, HEXIM1, GTF2F1, MED8, RB1CC1, NAB1, RBPJ, SMARCA2                                                                                                                                                                                                                                                                                                                                                                                                                                                        | 108        | 1769     | 17854     | 1.77556896      | 0.95864403 | 0.27280009 | 15.8664809 |  |  |
| ub1 conjugation pathway                                             | 8     | 7.14285714 | 0.02642268 | UBE2N, FBXL20, MED8, SENP5, UBE2B, UBE2E2, FBXL3, CNOT4                                                                                                                                                                                                                                                                                                                                                                                                                                                                                                                                       | 108        | 484      | 17854     | 2.73247628      | 0.99193359 | 0.35479426 | 28.0959795 |  |  |
| activator                                                           | 8     | 7.14285714 | 0.02642268 | PPARA, MEF2A, RBPMS, MED8, MITF, RBPJ, SMARCA2, RFXANK                                                                                                                                                                                                                                                                                                                                                                                                                                                                                                                                        | 108        | 484      | 17854     | 2.73247628      | 0.99193359 | 0.35479426 | 28.0959795 |  |  |
| rna-binding                                                         | 8     | 7.14285714 | 0.02668144 | ANKRD17, RBPMS, Z610101N10R1K, RBM43, RPL22, TNRC6B, NCL, CNOT4                                                                                                                                                                                                                                                                                                                                                                                                                                                                                                                               | 108        | 485      | 17854     | 2.72684231      | 0.99231045 | 0.33346176 | 28.3310215 |  |  |
| atp-binding                                                         | 14    | 12.5       | 0.04395846 | CSNK1A1, STK24, ACY, UBE2B, MTHFD1L, UBE2N, GSS, TAR, MAP3K1, VPS4B, DHX36, HSPA4, SMARCA2, UBE2E2                                                                                                                                                                                                                                                                                                                                                                                                                                                                                            | 108        | 1287     | 17854     | 1.79829635      | 0.99969393 | 0.46336588 | 42.5191905 |  |  |
| nucleus                                                             |       |            |            | MORF4L1, PPARA, MEF2A, MITF, NR6A1, EGLN2, AB1I, SENP5, RFXANK, CNOT4, GCH1, ANKRD17, HEXIM1, RB1CC1, DHX36, PITPNC1, PPP3CA, KLF9, TLE1, ZFP707, WWTR1, UBE2B, NCL, RCL1, RBPMS, GTF2F1, MED8, NAB1, RBPJ, SMARCA2, FBXL3                                                                                                                                                                                                                                                                                                                                                                    | 108        | 3808     | 17854     | 1.34578762      | 0.99998616 | 0.55027632 | 53.4935863 |  |  |
| Chaperone                                                           | 4     | 3.57142857 | 0.06137366 | ST13, BAG4, DNAAJ1, CDC37L1                                                                                                                                                                                                                                                                                                                                                                                                                                                                                                                                                                   | 108        | 150      | 17854     | 4.40839506      | 0.99998881 | 0.53235869 | 54.1668429 |  |  |
| DNA binding                                                         | 5     | 4.46428571 | 0.06960806 | PPARA, MITF, NR6A1, RBPJ, NCL                                                                                                                                                                                                                                                                                                                                                                                                                                                                                                                                                                 | 108        | 258      | 17854     | 3.20377548      | 0.99999771 | 0.55588868 | 58.8809321 |  |  |
| heme biosynthesis                                                   | 2     | 1.78571429 | 0.07519323 | ALAS1, FECH                                                                                                                                                                                                                                                                                                                                                                                                                                                                                                                                                                                   | 108        | 13       | 17854     | 25.4330484      | 0.99999923 | 0.56294106 | 61.8201896 |  |  |
| domain:RBM                                                          | 5     | 4.46428571 | 0.00435432 | RBPMS, Z610101N10R1K, RBM43, TNRC6B, CNOT4                                                                                                                                                                                                                                                                                                                                                                                                                                                                                                                                                    | 108        | 99       | 18021     | 7.49205013      | 0.81787622 | 0.81767622 | 5.88431099 |  |  |
| domain:SH3                                                          | 6     | 5.35714286 | 0.00473644 | CTNN, LASP1, AB1I, STAM, PIK3R1, ARHGAP12                                                                                                                                                                                                                                                                                                                                                                                                                                                                                                                                                     | 108        | 163      | 18021     | 5.46046353      | 0.84301412 | 0.80378556 | 6.38476508 |  |  |
| compositionally biased region:Asp/Glu-rich (acidic)                 | 4     | 3.57142857 | 0.03244989 | KLF9, CHCHD4, NCL, F2R                                                                                                                                                                                                                                                                                                                                                                                                                                                                                                                                                                        | 108        | 104      | 18021     | 5.70548431      | 0.99999741 | 0.98827379 | 36.7720606 |  |  |
| compositionally biased region:Poly-Thr mutagenesis site             | 3     | 2.67857143 | 0.03931324 | ANKRD17, RB1CC1, EGLN2                                                                                                                                                                                                                                                                                                                                                                                                                                                                                                                                                                        | 108        | 47       | 18021     | 9.46887612      | 0.99999984 | 0.97996792 | 42.7276153 |  |  |
|                                                                     | 10    | 8.92857143 | 0.0526155  | MTMR2, PPARA, BAG4, TP11, MAP3K1, NAB1, NR6A1, VPS4B, PPP3CA, WWTR1                                                                                                                                                                                                                                                                                                                                                                                                                                                                                                                           | 108        | 723      | 18021     | 2.05176477      | 1          | 0.98524125 | 52.8161224 |  |  |
| active site:Glycyl thioester intermediate subunit                   | 3     | 2.67857143 | 0.06269706 | UBE2N, UBE2B, UBE2E2                                                                                                                                                                                                                                                                                                                                                                                                                                                                                                                                                                          | 108        | 61       | 18021     | 7.29553734      | 1          | 0.98513385 | 59.3345493 |  |  |
|                                                                     |       |            |            | MORF4L1, PPARA, MEF2A, CHMP7, NR6A1, MITF, TSPAN9, CLTC, SDC4, TPD52, RFXANK, MTHFD1L, RELL1, CNOT4, GSS, BAG4, ALAS1, CTNN, DYNLL2, VPS4B, TUBB6, DHX36, STAM, FECH, BST2, FBXL20, LYRM4, ACTN1, TLE1, NCL, UBE2B, DHHD, UBE2N, ST13, SPAG9, TAR, PRDX6, MED8, NAB1, RAB5A, FBXL3, AHCY, AB1I, CHCHD4, GCH1, MTR2, TP11, ATXN2L, HEXIM1, MAP3K1, ETFDH, DAD1, HSPA4, PPP3CA, TNRC6B, CDC37L1, PIK3R1, CSNK1A1, CS, AK3, ACY, WWTR1, TUBGCP2, PPA1, ITPA, LASP1, ATP6V1E1, GTF2F1, RBPJ, PHLD2, TOB2                                                                                          | 109        | 7035     | 17178     | 1.59052444      | 8.98E-06   | 8.98E-06   | 3.42E-04   |  |  |
| pathway                                                             | 15    | 13.3928571 | 0.00140162 | FECH, AHCY, LYRM4, CS, UBE2B, MTHFD1L, GCH1, UBE2N, GSS, ALAS1, TP11, DHFR, MED8, RPIA, UBE2E2                                                                                                                                                                                                                                                                                                                                                                                                                                                                                                | 109        | 893      | 17178     | 2.6471948       | 0.02766229 | 0.01392814 | 1.06183333 |  |  |
| catalytic activity                                                  |       |            |            | AHCY, EGLN2, MTHFD1L, GCH1, GSS, ALAS1, TP11, MAP3K1, ETFDH, DAD1, DPP9, PPP3CA, RPIA, ZDHHC20, CSNK1A1, FECH, STK24, CS, AK3, ACY, UBE2B, DHHD, PPA1, UBE2N, TAR, ITPA, DHFR, PRDX6, UBE2E2                                                                                                                                                                                                                                                                                                                                                                                                  | 109        | 2553     | 17178     | 1.79016591      | 0.03644485 | 0.01229893 | 1.4028648  |  |  |
| interaction                                                         | 29    | 25.8928571 | 0.00185456 |                                                                                                                                                                                                                                                                                                                                                                                                                                                                                                                                                                                               | 109        | 2553     | 17178     | 1.79016591      | 0.03644485 | 0.01229893 | 1.4028648  |  |  |
| PTM                                                                 | 14    | 12.5       | 0.0019777  | AHCY, FBXL20, AB1I, TLE1, ACY, WWTR1, TPD52, NCL, CTNN, MAP3K1, RBPJ, SMARCA2, PIK3R1, FBXL3                                                                                                                                                                                                                                                                                                                                                                                                                                                                                                  | 109        | 824      | 17178     | 2.67760755      | 0.03881963 | 0.00984947 | 1.49540922 |  |  |
|                                                                     | 24    | 21.4285714 | 0.05898576 | MEF2A, MITF, AB1I, TLE1, TSPAN9, CHCHD4, WWTR1, RFXANK, CNOT4, GCH1, UBE2N, SPAG9, ATXN2L, LASP1, GTF2F1, MAP3K1, ETFDH, VPS4B, TUBB6, STAM, HSPA4, ZDHHC20, PIK3R1, F2R                                                                                                                                                                                                                                                                                                                                                                                                                      | 109        | 2628     | 17178     | 1.43923589      | 0.70356878 | 0.21587593 | 37.043177  |  |  |
| subcellular location                                                |       |            |            | MORF4L1, PPARA, MEF2A, TM7SF3, CHMP7, NR6A1, MITF, TSPAN9, CLTC, SENP5, SDC4, RFXANK, MTHFD1L, RELL1, CNOT4, ANKRD17, BAG4, CTAGE5, ALAS1, CTNN, DYNLL2, VPS4B, PITPNC1, DHX36, STAM, DPP9, POLC2, FECH, BST2, STK24, FBXL20, LYRM4, ACTN1, TLE1, NCL, UBE2B, ST13, SPAG9, RCL1, TAR, DHRS3, PRDX6, MED8, NAB1, RAB5A, FBXL3, AHCY, EGLN2, AB1I, CHCHD4, GCH1, MTR2, ALCAM, ATXN2L, MRPL15, TMEM33, HEXIM1, RB1CC1, DNAAJ1, ETFDH, DAD1, HSPA4, PPP3CA, ZDHHC20, TNRC6B, CDC37L1, CSNK1A1, KLF9, CS, AK3, IGF1, ACY, WWTR1, TUBGCP2, PPA1, ITPA, TEX2, LASP1, GTF2F1, CMTM8, RBPJ, PHLD2, F2R | 109        | 11804    | 17178     | 1.10814092      | 0.72302386 | 0.19262792 | 38.648709  |  |  |
|                                                                     | 83    | 74.1071429 | 0.06217433 |                                                                                                                                                                                                                                                                                                                                                                                                                                                                                                                                                                                               |            |          |           |                 |            |            |            |  |  |
|                                                                     |       |            |            |                                                                                                                                                                                                                                                                                                                                                                                                                                                                                                                                                                                               |            |          |           |                 |            |            |            |  |  |
|                                                                     |       |            |            |                                                                                                                                                                                                                                                                                                                                                                                                                                                                                                                                                                                               |            |          |           |                 |            |            |            |  |  |
| Pathways                                                            |       |            |            |                                                                                                                                                                                                                                                                                                                                                                                                                                                                                                                                                                                               |            |          |           |                 |            |            |            |  |  |
| Term                                                                | Count | %          | PValue     | Genes                                                                                                                                                                                                                                                                                                                                                                                                                                                                                                                                                                                         | List Total | Pop Hits | Pop Total | Fold Enrichment | Bonferroni | Benjamini  | FDR        |  |  |
| m_hdacPathway:Control of skeletal myogenesis by histone deacetylase | 4     | 3.57142857 | 0.00253713 | MEF2A, IGF1, PPP3CA, PIK3R1                                                                                                                                                                                                                                                                                                                                                                                                                                                                                                                                                                   | 19         | 19       | 1171      | 12.9750693      | 0.21242255 | 0.21242255 | 2.7462719  |  |  |
| m_pgcl1aPathway:Regulation of PGC-1a                                | 3     | 2.67857143 | 0.01343264 | PPARA, MEF2A, PPP3CA                                                                                                                                                                                                                                                                                                                                                                                                                                                                                                                                                                          | 19         | 12       | 1171      | 15.4078947      | 0.72004624 | 0.47083343 | 13.8065129 |  |  |
| m_nfat1Pathway:NfAT and Hypertrophy of the heart (1                 | 4     | 3.57142857 | 0.01837776 | CSNK1A1, IGF1, PPP3CA, PIK3R1                                                                                                                                                                                                                                                                                                                                                                                                                                                                                                                                                                 | 19         | 38       | 1171      | 6.48753463      | 0.825107   | 0.44076955 | 18.411147  |  |  |
| m_icer1Pathway:Fc Epsilon Receptor I Signaling in M                 | 3     | 2.67857143 | 0.08433366 | MAP3K1, PPP3CA, PIK3R1                                                                                                                                                                                                                                                                                                                                                                                                                                                                                                                                                                        | 19         | 32       | 1171      | 5.77796053      | 0.99974689 | 0.87386796 | 61.9581255 |  |  |
| mmu00790:Folate biosynthesis                                        | 2     | 1.78571429 | 0.09185992 | DHFR, GCH1                                                                                                                                                                                                                                                                                                                                                                                                                                                                                                                                                                                    | 51         | 11       | 5738      | 20.456328       | 0.99992075 | 0.99992075 | 65.5418858 |  |  |
| mmu04144:Endocytosis                                                | 5     | 4.46428571 | 0.0980211  | RAB5A, VPS4B, STAM, CLTC, F2R                                                                                                                                                                                                                                                                                                                                                                                                                                                                                                                                                                 | 51         | 202      | 5738      | 2.78489614      | 0.99995933 | 0.99362291 | 68.0403837 |  |  |
| P00060:Ubiquitin proteasome pathway                                 | 4     | 3.57142857 | 0.05961728 | UBE2N, UBE2B, PSM08, UBE2E2                                                                                                                                                                                                                                                                                                                                                                                                                                                                                                                                                                   | 30         | 91       | 2921      | 4.27985348      | 0.92886236 | 0.73283859 | 43.5617618 |  |  |
| P02743:Fornyltetrahydroformate biosynthesis                         | 2     | 1.78571429 | 0.07680799 | DHFR, MTHFD1L                                                                                                                                                                                                                                                                                                                                                                                                                                                                                                                                                                                 | 30         | 8        | 2921      | 24.3416687      | 0.96782211 | 0.68193259 | 52.4655882 |  |  |

| Gene symbol   | Refseq ID        | Chromosome   | Start Position  | End Position    | Strand   | Genbank ID      | Gene Description                                                                                                     |
|---------------|------------------|--------------|-----------------|-----------------|----------|-----------------|----------------------------------------------------------------------------------------------------------------------|
| 1200016E24Rik |                  |              |                 |                 |          |                 |                                                                                                                      |
| 1300002F13Rik |                  |              |                 |                 |          |                 |                                                                                                                      |
| 1300007C21Rik |                  |              |                 |                 |          |                 |                                                                                                                      |
| 1700018018Rik |                  |              |                 |                 |          |                 |                                                                                                                      |
| 1810009B06Rik |                  |              |                 |                 |          |                 |                                                                                                                      |
| 1810055002Rik |                  |              |                 |                 |          |                 |                                                                                                                      |
| 4833417J20Rik |                  |              |                 |                 |          |                 |                                                                                                                      |
| A1132487      |                  |              |                 |                 |          |                 |                                                                                                                      |
| Ass1          | NR_002687        | chr10        | 61533770        | 61535370        | +        | M31690          | predicted gene, EG432466   argininosuccinate synthetase 1                                                            |
| Camk2b        | NM_007595        | chr11        | 5869654         | 5965751         | -        | BC080273        | calcium/calmodulin-dependent protein kinase II, beta                                                                 |
| Ccrn4l        | NM_009834        | chr3         | 51028369        | 51055566        | +        | AF183960        | CCR4 carbon catabolite repression 4-like (S. cerevisiae)   similar to carbon catabolite repression 4 protein homolog |
| Chordc1       | NM_025844        | chr9         | 18096711        | 18118445        | +        | BC018374        | cysteine and histidine-rich domain (CHORD)-containing, zinc-binding protein 1                                        |
| Cirbp         | NM_007705        | chr10        | 79630586        | 79634400        | +        | BC075699        | cold inducible RNA binding protein                                                                                   |
| E430026E19Rik |                  |              |                 |                 |          |                 |                                                                                                                      |
| ErbB3         | NM_010153        | chr10        | 128005702       | 128026708       | -        | BC106091        | v-erb-b2 erythroblastic leukemia viral oncogene homolog 3 (avian)                                                    |
| <b>Fbxl20</b> | <b>NM_028149</b> | <b>chr11</b> | <b>97943868</b> | <b>98010930</b> | <b>-</b> | <b>EF649694</b> | <b>F-box and leucine-rich repeat protein 20</b>                                                                      |
| Fbxo21        | NM_145564        | chr5         | 118426742       | 118460200       | +        | BC021871        | F-box protein 21                                                                                                     |
| Fus           | NM_139149        | chr7         | 135110993       | 135125546       | +        | BC040827        | fusion, derived from t(12;16) malignant liposarcoma (human)                                                          |
| Heca          | NM_028440        | chr10        | 17618855        | 17738777        | -        | BC098509        | RIKEN cDNA 3110003A17 gene   headcase homolog (Drosophila)                                                           |
| Hsp105        |                  |              |                 |                 |          |                 |                                                                                                                      |
| Hspa1b        | NM_010478        | chr17        | 35094024        | 35095952        | -        |                 | heat shock protein 1B   heat shock protein 1A                                                                        |
| Hspa8         | NM_031165        | chr9         | 40609356        | 40613282        | +        | BC089322        | heat shock protein 8                                                                                                 |
| Hspca         |                  |              |                 |                 |          |                 |                                                                                                                      |
| Irf1          | NM_008331        | chr19        | 34715379        | 34724499        | +        | BC003768        | interferon-induced protein with tetratricopeptide repeats 1                                                          |
| Ldb1          | NM_010697        | chr19        | 45107083        | 46119404        | +        | U69270          | LIM domain binding 1                                                                                                 |
| Per2          | NM_011066        | chr1         | 93312559        | 93355873        | -        | AF036883        | period homolog 2 (Drosophila)   RIKEN cDNA 9830107B12 gene                                                           |
| Slc25a25      | NM_146118        | chr2         | 32270004        | 32306942        | -        | BC037109        | solute carrier family 25 (mitochondrial carrier, phosphate carrier), member 25                                       |
| Stip1         | NM_016737        | chr19        | 7095192         | 7114801         | -        | BC003794        | stress-induced phosphoprotein 1                                                                                      |
| Tgln1         | NM_009443        | chr6         | 72558414        | 72566994        | -        | D50032          | trans-golgi network protein   trans-golgi network protein 2   hypothetical protein LOC100038890                      |
| Tuba4         |                  |              |                 |                 |          |                 |                                                                                                                      |

Table S7

| Gene symbol   | Refseq ID        | Chromosome   | Start Position   | End Position     | Strand | Genbank ID      | Gene Description                                                                                   |
|---------------|------------------|--------------|------------------|------------------|--------|-----------------|----------------------------------------------------------------------------------------------------|
| 061007L01Rik  | NM_0010813       | chr5         | 130698295        | 130719535        | -      | BC033455        | RIKEN cDNA 061007L01 gene                                                                          |
| 061009H04Rik  |                  |              |                  |                  |        |                 |                                                                                                    |
| 0610038F07Rik | NM_025333        | chr19        | 10576130         | 10596999         | -      | BC085277        | RIKEN cDNA 0610038F07 gene                                                                         |
| 1110007M04Rik | NM_026742        | chr4         | 24825248         | 24832148         | +      | BC026764        | RIKEN cDNA 1110007M04 gene                                                                         |
| 1110017O22Rik |                  |              |                  |                  |        |                 |                                                                                                    |
| 1110038B12Rik |                  |              |                  |                  |        |                 |                                                                                                    |
| 1110039B18Rik |                  | chr5         | 31172006         | 31180737         | +      | BC029150        | RIKEN cDNA 1110039B18 gene                                                                         |
| 1110059G02Rik |                  |              |                  |                  |        |                 |                                                                                                    |
| 1110064P04Rik |                  |              |                  |                  |        |                 |                                                                                                    |
| 1190002C06Rik |                  |              |                  |                  |        |                 |                                                                                                    |
| 1200013P24Rik | NM_029090        | chr16        | 3884883          | 3904766          | +      | BC004837        | RIKEN cDNA 1200013P24 gene                                                                         |
| 130001101Rik  |                  | chr11        | 74463942         | 74483439         | +      | BC072573        | RIKEN cDNA 130001101 gene                                                                          |
| 1300020K09Rik | NM_028788        | chr4         | 45803794         | 45899876         | +      | BC111889        | RIKEN cDNA 1300020K09 gene                                                                         |
| 130006C19Rik  |                  |              |                  |                  |        |                 |                                                                                                    |
| 130006N24Rik  |                  |              |                  |                  |        |                 |                                                                                                    |
| 1300013F15Rik |                  |              |                  |                  |        |                 |                                                                                                    |
| 1300018J16Rik | NM_027905        | chr15        | 88919537         | 88930770         | +      |                 | RIKEN cDNA 1300018J16 gene                                                                         |
| 1500030C03Rik | NM_019769        | chr2         | 119373443        | 119412760        | +      | BC054733        | RIKEN cDNA 1500030C03 gene   similar to EF-hand Ca2+ binding protein p22                           |
| 1500010M16Rik |                  |              |                  |                  |        |                 |                                                                                                    |
| 1500035H01Rik | NM_023831        | chr9         | 44581092         | 44600797         | +      | BC080764        | RIKEN cDNA 1500035H01 gene                                                                         |
| 1600014C10Rik | NM_0010853       | chr7         | 38968305         | 38982587         | +      | BC085480        | RIKEN cDNA 1600014C10 gene                                                                         |
| 1700012G19Rik |                  | chr17        | 24607380         | 24608553         | +      | BC083113        | RIKEN cDNA 1700012G19 gene   jagged 2                                                              |
| 1700021I09Rik |                  |              |                  |                  |        |                 |                                                                                                    |
| 1700052N19Rik | NM_024261        | chr10        | 5891401          | 5914028          | -      | BC098894        | RIKEN cDNA 1700052N19 gene                                                                         |
| 1810003N24Rik |                  |              |                  |                  |        |                 |                                                                                                    |
| 1810009A15Rik |                  | chr19        | 8958430          | 8965231          | +      | BC047099        | RIKEN cDNA 1810009A15 gene   hypothetical protein LOC100048454                                     |
| 1810034M08Rik |                  |              |                  |                  |        |                 |                                                                                                    |
| 1810044O22Rik |                  |              |                  |                  |        |                 |                                                                                                    |
| 1810048P08Rik |                  |              |                  |                  |        |                 |                                                                                                    |
| 2010013E14Rik |                  |              |                  |                  |        |                 |                                                                                                    |
| 2310005N03Rik | NM_025511        | chr1         | 180249284        | 180252824        | +      | BC055277        | RIKEN cDNA 2310005N03 gene                                                                         |
| 2310008M10Rik | NM_025509        | chr3         | 130398837        | 130412336        | -      | BC021935        | RIKEN cDNA 2310008M10 gene                                                                         |
| 2310042G06Rik |                  |              |                  |                  |        |                 |                                                                                                    |
| 2400002F11Rik |                  |              |                  |                  |        |                 |                                                                                                    |
| 2410002O22Rik | NM_025879        | chr13        | 104932234        | 104988519        | -      | BC021756        | RIKEN cDNA 2410002O22 gene   hypothetical protein LOC100040518   hypothetical protein LOC100044479 |
| 2410003B16Rik |                  |              |                  |                  |        |                 |                                                                                                    |
| 2410006H16Rik |                  |              |                  |                  |        |                 |                                                                                                    |
| 2410016F19Rik |                  |              |                  |                  |        |                 |                                                                                                    |
| 2510048O06Rik |                  |              |                  |                  |        |                 |                                                                                                    |
| 2610024B07Rik |                  | chr7         | 120047773        | 120050298        | +      | BC049153        | RIKEN cDNA 2610024B07 gene                                                                         |
| 261029C04Rik  |                  |              |                  |                  |        |                 |                                                                                                    |
| 270006E02Rik  | NM_026528        | chr14        | 20630624         | 20643045         | -      | BC096571        | RIKEN cDNA 270006E02 gene                                                                          |
| 2700094F01Rik |                  |              |                  |                  |        |                 |                                                                                                    |
| 2810012H18Rik |                  |              |                  |                  |        |                 |                                                                                                    |
| 2810405J04Rik | NM_133747        | chr17        | 75936431         | 75951183         | -      | BC004626        | RIKEN cDNA 2810405J04 gene                                                                         |
| 2810409I07Rik |                  |              |                  |                  |        |                 |                                                                                                    |
| 2900045N06Rik |                  |              |                  |                  |        |                 |                                                                                                    |
| 2900084M01Rik |                  |              |                  |                  |        |                 |                                                                                                    |
| 3300001H21Rik |                  |              |                  |                  |        |                 |                                                                                                    |
| 4833439L19Rik |                  | chr13        | 54662584         | 54666722         | -      | BC033445        | RIKEN cDNA 4833439L19 gene                                                                         |
| 4921513D23Rik | NM_0010811       | chr16        | 14111626         | 14163444         | -      | AK220341        | RIKEN cDNA 4921513D23 gene                                                                         |
| 4930408M20Rik | XM_127489        | chr13        | 93219786         | 93253968         | -      | AK162422        | RIKEN cDNA 4930408M20 gene                                                                         |
| 4930542G03Rik |                  |              |                  |                  |        |                 |                                                                                                    |
| 4932442E05Rik |                  | chr10        | 118297882        | 118300598        | +      |                 | RIKEN cDNA 4932442E05 gene                                                                         |
| 4933407N01Rik | NM_025745        | chr11        | 30829784         | 30854141         | -      | BC018468        | RIKEN cDNA 4933407N01 gene                                                                         |
| 4933426M11Rik |                  | chr12        | 81891546         | 81981822         | +      | BC040401        | RIKEN cDNA 4933426M11 gene                                                                         |
| 5033425B17Rik |                  |              |                  |                  |        |                 |                                                                                                    |
| 5730592L21Rik |                  |              |                  |                  |        |                 |                                                                                                    |
| 5830458K16Rik |                  |              |                  |                  |        |                 |                                                                                                    |
| 5830472M02Rik | NM_029512        | chr2         | 163428050        | 163447449        | +      | BC052389        | RIKEN cDNA 5830472M02 gene                                                                         |
| 6330407G11Rik | NM_023423        | chr4         | 123407396        | 123427588        | -      | BC003291        | RIKEN cDNA 6330407G11 gene                                                                         |
| 9030626A04Rik | NM_172488        | chr14        | 77424008         | 77436424         | -      | BC116748        | RIKEN cDNA 9030626A04 gene                                                                         |
| 9130229H14Rik |                  |              |                  |                  |        |                 |                                                                                                    |
| A030012M09Rik |                  |              |                  |                  |        |                 |                                                                                                    |
| AA959742      |                  |              |                  |                  |        |                 |                                                                                                    |
| Aars          | NM_146217        | chr8         | 113557802        | 113581501        | +      | BC033273        | Balanyl-tRNA synthetase   exosome component 6                                                      |
| Abce1         | NM_019751        | chr8         | 82207341         | 82235639         | -      | BC005422        | ATP-binding cassette, sub-family E (OABP), member 1                                                |
| Abtb1         | NM_030251        | chr6         | 88785910         | 88791894         | -      | AB053477        | ankyrin repeat and BTB (POZ) domain containing 1                                                   |
| Acaa1         |                  |              |                  |                  |        |                 |                                                                                                    |
| Acadvl        | NM_017366        | chr11        | 69823685         | 69828909         | -      | BC026559        | acyl-Coenzyme A dehydrogenase, very long chain                                                     |
| Acta1         | <b>NM_134037</b> | <b>chr11</b> | <b>100337670</b> | <b>100389215</b> | -      | <b>BC065638</b> | <b>ATP citrate lyase</b>                                                                           |
| Aco1l2        | NM_028790        | chr2         | 91881123         | 91925755         | +      | BC132050        | acyl-CoA thioesterase 12                                                                           |
| Acp2          | NM_007387        | chr3         | 91043076         | 91052931         | -      | AK128963        | acid phosphatase 2, lysosomal                                                                      |
| Acsf4         | NM_207629        | chrX         | 138752536        | 138825078        | -      | BC058663        | acyl-CoA synthetase long-chain family member 4                                                     |
| Acta2         | NM_007392        | chr19        | 3431581          | 3433926          | -      | BC048400        | actin, alpha 2, smooth muscle, aorta                                                               |
| Actb          | NM_007393        | chr5         | 143684795        | 143688403        | -      | J04181          | actin, beta, cytoplasmic                                                                           |
| Actg1         | NM_009609        | chr11        | 120207003        | 120209806        | -      | AF195094        | actin, gamma, cytoplasmic 1                                                                        |
| Adrn1         | NM_019822        | chr2         | 179906293        | 179910988        | +      | BC031517        | adhesion regulating molecule 1                                                                     |
| Apat2         | NM_028212        | chr2         | 26448810         | 26459811         | -      | BC125530        | 1-acylglycerol-3-phosphate O-acyltransferase 2 (lysophosphatidic acid acyltransferase, beta)       |
| Apal3         | NM_059014        | chr10        | 77734298         | 77814445         | -      | BC052382        | 1-acylglycerol-3-phosphate O-acyltransferase 3                                                     |
| Ahsn1         | NM_148036        | chr12        | 88607858         | 88614930         | -      | BC025552        | Ahn1, activator of heat shock protein A1/ase homolog 1 (yeast)                                     |
| Al132487      | NM_0010123       | chr12        | 110089339        | 110095025        | +      | BC089616        |                                                                                                    |
| Al195470      |                  |              |                  |                  |        |                 |                                                                                                    |
| Akr1c12       | NM_013777        | chr13        | 4267418          | 4278645          | -      | BC012843        | aldo-keto reductase family 1, member C12                                                           |
| Aldh1l1       | NM_027406        | chr6         | 90500812         | 90549165         | +      | BC030722        | aldehyde dehydrogenase 1 family, member L1                                                         |
| Aldh2         | NM_009856        | chr5         | 122017596        | 122043833        | -      | U07235          | aldehyde dehydrogenase 2, mitochondrial                                                            |
| Aldoa         | NM_007438        | chr7         | 133958748        | 133942697        | -      | BC089495        | aldolase 1, A isoform                                                                              |
| Agl12         | NM_145477        | chr15        | 88635673         | 88649715         | -      | BC021379        | asparagine-linked glycosylation 12 homolog (yeast, alpha-1,6-mannosyltransferase)                  |
| Aisz          | NM_028717        | chr1         | 59219774         | 59294063         | -      | BC046828        | amryopic lateral sclerosis 2 (juvenile) homolog (human)                                            |
| Amd1          | NM_009665        | chr10        | 40008969         | 40021992         | -      | BC092072        | S-adenosylmethionine decarboxylase 1   S-adenosylmethionine decarboxylase, pseudogene 3            |
| Anapc5        | NM_021505        | chr5         | 123237488        | 123271348        | -      | BC010339        | anaphase-promoting complex subunit 5                                                               |
| Angpt4        | NM_029381        | chr17        | 33810866         | 33818520         | -      | BC006811        | angiotensin-like 4                                                                                 |
| Azb2b1        | NM_0010358       | chr11        | 83116199         | 83218541         | -      | BC046772        | adaptor-related protein complex 2, beta 1 subunit                                                  |
| Arcn1         | NM_145985        | chr9         | 44549851         | 44575899         | -      | BC083152        | archoan 1                                                                                          |
| Arl4          | NM_007479        | chr14        | 27457683         | 27476744         | +      | BC115650        | ADP-ribosylation factor 4                                                                          |
| Armet         | NM_029103        | chr9         | 106789748        | 106794361        | -      | BC038901        | arginine-rich, mutated in early stage tumors                                                       |
| Arcp2         | NM_029711        | chr15        | 74283124         | 74314787         | +      | BC115750        | actin related protein 2/3 complex, subunit 2                                                       |
| Arcp3         | NM_028802        | chr8         | 38868338         | 38871397         | -      | BC024482        | actin related protein 2/3 complex, subunit 5-like                                                  |
| Arpp19        | NM_021548        | chr9         | 74885539         | 74908122         | +      | BC040206        | cAMP-regulated phosphoprotein 19                                                                   |
| Asb13         | NM_080857        | chr13        | 3633278          | 3651025          | +      | BC018240        | ankyrin repeat and SOCS box-containing protein 13                                                  |
| Ata4          | NM_009716        | chr15        | 80085614         | 80087971         | +      | BC085169        | activating transcription factor 4                                                                  |
| Ata8          | NM_153778        | chr6         | 72156171         | 72185571         | -      | AB046527        | lateral homolog 8 (Drosophila)                                                                     |
| Atb2a2        | NM_0011104       | chr5         | 122892711        | 122892183        | -      | BC054531        | A1/Pase, Ca++ transporting, cardiac muscle, slow twitch 2                                          |
| Aven          | NM_028844        | chr2         | 112333121        | 11241227         | +      | BC010075        | apoptosis, caspase activation inhibitor                                                            |
| Avp1          | NM_027106        | chr19        | 42197765         | 42203517         | -      | BC027646        | arginine vasopressin-induced 1                                                                     |
| AW209491      | NM_134067        | chr13        | 14722544         | 14731363         | +      | BC016098        |                                                                                                    |
| AW491445      |                  |              |                  |                  |        |                 |                                                                                                    |
| BC002216      |                  |              |                  |                  |        |                 |                                                                                                    |
| BC004004      |                  | chr17        | 29405896         | 29439826         | +      | BC058575        |                                                                                                    |
| BC006705      |                  |              |                  |                  |        |                 |                                                                                                    |
| BC024806      |                  |              |                  |                  |        |                 |                                                                                                    |
| BC037006      |                  |              |                  |                  |        |                 |                                                                                                    |
| Bccip         | NM_025392        | chr7         | 140901020        | 140926578        | +      | BC048465        | BRCA2 and CDKN1A interacting protein                                                               |
| Bop1          | NM_013481        | chr15        | 76283428         | 76307699         | -      | U77415          | block of proliferation 1                                                                           |
| Bont1         | NM_011794        | chr1         | 197156038        | 197181648        | +      | BC011036        | bisphosphate 3'-nucleotidase 1                                                                     |
| Brap          | NM_028227        | chr5         | 122110595        | 122137259        | +      | AF321921        | BRCA1 associated protein                                                                           |
| Bre           | NM_181279        | chr5         | 32000347         | 32387320         | +      | BC061000        | brain and reproductive organ-expressed protein                                                     |
| Brd3          | NM_018772        | chr5         | 145016105        | 145025442        | -      | BC095955        | brain protein 13                                                                                   |
| Bsdc1         | NM_133889        | chr4         | 129138923        | 129165685        | -      | BC049111        | BSD domain containing 1                                                                            |
| Bysl          | NM_018859        | chr17        | 47737029         | 47748433         | -      | BC017530        | bystin-like                                                                                        |
| Bzw1          | NM_028824        | chr1         | 58449871         | 58463397         | -      | BC028865        | basic leucine zipper and W2 domains 1                                                              |
| C13005212Rik  |                  |              |                  |                  |        |                 |                                                                                                    |
| C1ql3         | NM_153155        | chr2         | 12923514         | 12933374         | -      | AB044560        | C1ql-like 3                                                                                        |
| C730036D15Rik | NM_145368        | chr4         | 49392717         | 49421023         | -      | BC010829        | RIKEN cDNA C730036D15 gene                                                                         |
| C730043O17    |                  |              |                  |                  |        |                 |                                                                                                    |
| Cacypb        | NM_009786        | chr1         | 162132500        | 162142908        | -      | BC025948        | calcyclin binding protein                                                                          |
| Cad           | NM_023525        | chr5         | 31357184         | 31380852         | -      | BC053097        | carbamoyl-phosphate synthetase 2, aspartate transcarbamylase, and dihydroorotase                   |
| Cald1         | NM_145575        | chr6         | 34548545         | 34724100         | +      | BC019435        | caldesmon 1                                                                                        |
| Calm1         | NM_009790        | chr12        | 101437738        | 101448016        | +      | BC054805        | calmodulin 1   calmodulin 2   calmodulin 3                                                         |
| Calr          | NM_007591        | chr8         | 87365749         | 87370830         | -      | M92988          | calreticulin                                                                                       |
| Canx          | NM_007597        | chr11        | 50107965         | 50139094         | -      | BC040244        | calnexin                                                                                           |
| Car3          | NM_007606        | chr3         | 14838568         | 14812532         | -      | BC011129        | carbonic anhydrase 3                                                                               |
| Casp7         | NM_007611        | chr19        | 56471619         | 56516837         | +      | Y13088          | caspase 7                                                                                          |
| Cct2          | NM_007636        | chr10        | 116488055        | 116500836        | -      | BC026918        | chaperonin subunit 2 (beta)                                                                        |
| Cct3          | NM_009836        | chr3         | 88101057         | 88125688         | +</    |                 |                                                                                                    |

|               |                  |              |                 |                 |          |                 |                                                                                                                                                                                                                                                                                                               |
|---------------|------------------|--------------|-----------------|-----------------|----------|-----------------|---------------------------------------------------------------------------------------------------------------------------------------------------------------------------------------------------------------------------------------------------------------------------------------------------------------|
| Chka          | NM 013490        | chr19        | 3851773         | 3894369         | +        | BC060218        | choline kinase alpha                                                                                                                                                                                                                                                                                          |
| Chordc1       | NM 025844        | chr9         | 18096711        | 18118445        | +        | BC018374        | cysteine and histidine-rich domain (CHORD)-containing, zinc-binding protein 1                                                                                                                                                                                                                                 |
| Clap1         |                  |              |                 |                 |          |                 |                                                                                                                                                                                                                                                                                                               |
| Clidn1        | NM 016674        | chr16        | 26356737        | 26371925        | +        | BC002003        | claudin 1                                                                                                                                                                                                                                                                                                     |
| Clidn2        | NM 016675        | chrX         | 136335367       | 136345925       | +        | BC085494        | claudin 2                                                                                                                                                                                                                                                                                                     |
| Clock         | NM 007715        | chr5         | 76639992        | 76733817        | +        | AF000998        | circadian locomotor output cycles kaput                                                                                                                                                                                                                                                                       |
| Cltb          | NM 028870        | chr13        | 54694300        | 54712635        | +        | BC070404        | clathrin, light polypeptide (Lcb)                                                                                                                                                                                                                                                                             |
| Cm2           | NM 053096        | chr6         | 85815416        | 85819152        | +        | BC039773        | camello-like 2                                                                                                                                                                                                                                                                                                |
| Cndc2         | NM 023149        | chr18        | 84836857        | 84855025        | +        | BC003532        | CNDP dipeptidase 2 (metallopeptidase M20 family)                                                                                                                                                                                                                                                              |
| Cnfr          | NM 009919        | chr14        | 47395257        | 47408013        | +        | AF022811        | gornichon homolog (Drosophila)                                                                                                                                                                                                                                                                                |
| Copg          | NM 017477        | chr16        | 87837934        | 87863589        | +        | BC024896        | coatamer protein complex, subunit gamma                                                                                                                                                                                                                                                                       |
| Copz1         | NM 019817        | chr15        | 103103330       | 103130300       | +        | BC025041        | coatamer protein complex, subunit zeta 1                                                                                                                                                                                                                                                                      |
| Cop11a        | NM 013495        | chr19        | 33232320        | 3385733         | +        | BC046383        | carnitine palmitoyltransferase 1a, liver                                                                                                                                                                                                                                                                      |
| Crebbp        | NM 0010254       | chr16        | 4084048         | 4213404         | +        |                 | CREB binding protein                                                                                                                                                                                                                                                                                          |
| Creb1         | NM 011406        | chr17        | 34340381        | 34732019        | +        | BC013534        | cAMP responsive element binding protein-like 1                                                                                                                                                                                                                                                                |
| Creb          | NM 007768        | chr1         | 174628187       | 174630093       | +        | BC011124        | C-reactive protein, pentraxin-related                                                                                                                                                                                                                                                                         |
| Csnk2b        | NM 009975        | chr17        | 35253140        | 35268392        | +        | BC003775        | casein kinase 2, beta polypeptide                                                                                                                                                                                                                                                                             |
| Csrp3         | NM 013808        | chr7         | 56065768        | 56103403        | +        | BC061131        | cysteine and glycine-rich protein 3                                                                                                                                                                                                                                                                           |
| Cxadr         | NM 009988        | chr16        | 78301936        | 78306030        | +        | BC016457        | coxsackievirus and adenovirus receptor                                                                                                                                                                                                                                                                        |
| Cyp2d22       | NM 019823        | chr15        | 82201902        | 82210592        | +        | BC016256        | cytochrome P450, family 2, subfamily d, polypeptide 22                                                                                                                                                                                                                                                        |
| Cyp4f13       | NM 130882        | chr17        | 33061614        | 33083415        | +        | AF233643        | cytochrome P450, family 4, subfamily f, polypeptide 13                                                                                                                                                                                                                                                        |
| Cyp51         | NM 020010        | chr5         | 4080674         | 4104697         | +        | BC031813        | cytochrome P450, family 5f                                                                                                                                                                                                                                                                                    |
| Cyp8b1        | NM 010012        | chr9         | 121823474       | 121825415       | +        | BC010973        | cytochrome P450, family 8, subfamily b, polypeptide 1                                                                                                                                                                                                                                                         |
| D10Etd214e    |                  |              |                 |                 |          |                 |                                                                                                                                                                                                                                                                                                               |
| D10Etd438e    |                  |              |                 |                 |          |                 |                                                                                                                                                                                                                                                                                                               |
| D11Etd498e    |                  |              |                 |                 |          |                 |                                                                                                                                                                                                                                                                                                               |
| D11Etd635e    |                  |              |                 |                 |          |                 |                                                                                                                                                                                                                                                                                                               |
| D11Etd99e     |                  |              |                 |                 |          |                 |                                                                                                                                                                                                                                                                                                               |
| D11Lgp2e      |                  |              |                 |                 |          |                 |                                                                                                                                                                                                                                                                                                               |
| D17Etd441e    |                  |              |                 |                 |          |                 |                                                                                                                                                                                                                                                                                                               |
| D19Wsu162e    |                  |              |                 |                 |          |                 |                                                                                                                                                                                                                                                                                                               |
| D3Uca1        | NM 030685        | chr3         | 46673604        | 46731879        | +        | BC058949        | DNA segment, Chr 19, Wayne State University 162, expressed                                                                                                                                                                                                                                                    |
| D630048P19rik |                  |              | 58325891        | 58329676        | +        | AB041855        | DNA segment, Chr 3, University of California at Los Angeles 1                                                                                                                                                                                                                                                 |
| D7Wsu128e     |                  |              |                 |                 |          |                 |                                                                                                                                                                                                                                                                                                               |
| D8Erd325e     |                  |              |                 |                 |          |                 |                                                                                                                                                                                                                                                                                                               |
| D93000122Rik  | NM 173397        | chr2         | 163292124       | 163298364       | +        | BC090994        | RIKEN cDNA D93000122 gene                                                                                                                                                                                                                                                                                     |
| Dcm2          | NM 027151        | chr10        | 126703455       | 126718663       | +        | BC004613        | dynamactin 2                                                                                                                                                                                                                                                                                                  |
| Ddnc3         | NM 016862        | chr13        | 17381106        | 17381103        | +        | AF071068        | deoxa deacetylase                                                                                                                                                                                                                                                                                             |
| Ddot          | NM 007838        | chr4         | 137860651       | 137868526       | +        | BC068132        | dolichyl- <i>dl</i> -phosphooligosaccharide-protein glycotransferase                                                                                                                                                                                                                                          |
| Ddx39         | NM 197982        | chr8         | 86239098        | 86247247        | +        | BC020134        | DEAD (Asp-Glu-Ala-Asp) box polypeptide 39                                                                                                                                                                                                                                                                     |
| Ddx58         | NM 172689        | chr4         | 40151892        | 40186793        | +        | AY553221        | DEAD (Asp-Glu-Ala-Asp) box polypeptide 58                                                                                                                                                                                                                                                                     |
| Der12         | NM 033562        | chr11        | 70820947        | 70832765        | +        | AF208064        | Der1-like domain family, member 2                                                                                                                                                                                                                                                                             |
| Dhcr7         | NM 007266        | chr7         | 151098972       | 151034315       | +        | AF057368        | 7-dehydrocholesterol reductase                                                                                                                                                                                                                                                                                |
| Dhx29         | NM 172584        | chr13        | 113171928       | 113759640       | +        | BC057112        | DEAF1 (Hsp40-like) box polypeptide 29                                                                                                                                                                                                                                                                         |
| Dirc2         | NM 153550        | chr16        | 35694989        | 35769442        | +        | BC037460        | disrupted in renal carcinoma 2 (human)                                                                                                                                                                                                                                                                        |
| <b>Dnaj1</b>  | <b>NM 008238</b> | <b>chr4</b>  | <b>40669566</b> | <b>40681997</b> | <b>+</b> | <b>AF055664</b> | <b>Dnaj (Hsp40) homolog, subfamily A, member 1</b>                                                                                                                                                                                                                                                            |
| Dnajb11       | NM 026400        | chr16        | 22857937        | 22879707        | +        | BC018282        | Dnaj (Hsp40) homolog, subfamily B, member 11                                                                                                                                                                                                                                                                  |
| Dnajc1        | NM 007869        | chr2         | 18127960        | 18314438        | +        | BC080300        | Dnaj (Hsp40) homolog, subfamily C, member 1                                                                                                                                                                                                                                                                   |
| Dnajc3        |                  |              |                 |                 |          |                 |                                                                                                                                                                                                                                                                                                               |
| Dnajc5        | NM 016775        | chr2         | 181255210       | 181286954       | +        | BC012268        | Dnaj (Hsp40) homolog, subfamily C, member 5                                                                                                                                                                                                                                                                   |
| Dncl1         |                  |              |                 |                 |          |                 |                                                                                                                                                                                                                                                                                                               |
| Dlx1          | NM 008052        | chr5         | 121130212       | 121161678       | +        | AB015422        | delx1 homolog (Drosophila)                                                                                                                                                                                                                                                                                    |
| Dlymk         | NM 0011056       | chr19        | 95689160        | 95698482        | +        | BC030178        | deoxythymidylate kinase                                                                                                                                                                                                                                                                                       |
| E430028B21Rik | NM 178668        | chr14        | 27483601        | 27489332        | +        | BC064450        | RIKEN cDNA E430028B21 gene                                                                                                                                                                                                                                                                                    |
| E430034L04Rik |                  |              |                 |                 |          |                 |                                                                                                                                                                                                                                                                                                               |
| Eef1g         | NM 026007        | chr19        | 9041531         | 9052965         | +        |                 | eukaryotic translation elongation factor 1 gamma                                                                                                                                                                                                                                                              |
| Eihaf         | NM 028643        | chr14        | 58535115        | 58618099        | +        | BC031172        | EF hand domain family A1                                                                                                                                                                                                                                                                                      |
| Ehd1          | NM 010119        | chr19        | 6276734         | 6300096         | +        | BC043332        | EH-domain containing 1                                                                                                                                                                                                                                                                                        |
| Eifs1         |                  |              |                 |                 |          |                 |                                                                                                                                                                                                                                                                                                               |
| Eifs5         |                  |              |                 |                 |          |                 |                                                                                                                                                                                                                                                                                                               |
| Eifs6ip       |                  |              |                 |                 |          |                 |                                                                                                                                                                                                                                                                                                               |
| Eif4a1        | NM 144958        | chr1         | 80760761        | 80762537        | +        | X03040          | eukaryotic translation initiation factor 4A1                                                                                                                                                                                                                                                                  |
| Eif4e         | NM 007917        | chr3         | 138189155       | 138220563       | +        | BC085087        | eukaryotic translation initiation factor 4E                                                                                                                                                                                                                                                                   |
| Eif4ebp1      | NM 007918        | chr8         | 28370831        | 28387140        | +        | U28656          | eukaryotic translation initiation factor 4E binding protein 1                                                                                                                                                                                                                                                 |
| Elovl1        | NM 027352        | chr2         | 17499833        | 17529800        | +        | AF005900        | elongation of very long chain fatty acids (FEN1/Elo2, SUR4/Elo3, yeast)-like 1                                                                                                                                                                                                                                |
| Elovl6        | NM 130450        | chr3         | 129235304       | 129341413       | +        | AY053453        | ELOVL family member 6, elongation of long chain fatty acids (yeast)                                                                                                                                                                                                                                           |
| ErbB3         | NM 010153        | chr10        | 128005702       | 128026708       | +        | BC106091        | v-erb-b2 erythroblastic leukemia viral oncogene homolog 3 (avian)                                                                                                                                                                                                                                             |
| Esd           | NM 016903        | chr14        | 75132125        | 75150250        | +        | AB025408        | esterase D/fornylglutathione hydrolase                                                                                                                                                                                                                                                                        |
| Ethe1         | NM 023154        | chr7         | 25372562        | 25393944        | +        | BC094044        | ethylmalonic encephalopathy 1                                                                                                                                                                                                                                                                                 |
| Fah           | NM 010176        | chr7         | 91733669        | 91754278        | +        | M84145          | fumarylacetoacetate hydrolase                                                                                                                                                                                                                                                                                 |
| Fahd1         | NM 023487        | chr11        | 24927919        | 24987247        | +        | BC028539        | fumarate acetoacetate hydrolase domain containing 1                                                                                                                                                                                                                                                           |
| Fbxo22        | NM 028049        | chr9         | 55556802        | 55072240        | +        | BC018273        | F-box protein 22                                                                                                                                                                                                                                                                                              |
| Fbxo31        | NM 133765        | chr8         | 124075914       | 124102691       | +        | BC026929        | F-box protein 31                                                                                                                                                                                                                                                                                              |
| Fpps          | NM 134469        | chr3         | 88897510        | 88905867        | +        | BC048497        | flamesyl diphosphate synthetase                                                                                                                                                                                                                                                                               |
| <b>Fech</b>   | <b>NM 007998</b> | <b>chr18</b> | <b>64616202</b> | <b>64648720</b> | <b>+</b> | <b>BC006746</b> | <b>ferrochelatase</b>                                                                                                                                                                                                                                                                                         |
| Fkbp1a        | NM 008019        | chr2         | 151368235       | 151387427       | +        | AB241120        | FK506 binding protein 1a                                                                                                                                                                                                                                                                                      |
| Fkbp4         | NM 010216        | chr6         | 12837656        | 12838674        | +        | BC030447        | FK506 binding protein 4                                                                                                                                                                                                                                                                                       |
| Gabarap1      | NM 020590        | chr6         | 129483183       | 129492349       | +        | AF180518        | gamma-aminobutyric acid (GABA(A)) receptor-associated protein-like 1                                                                                                                                                                                                                                          |
| Gabarap2      | NM 026693        | chr5         | 23623594        | 23624545        | +        | AF190644        | gamma-aminobutyric acid (GABA(A)) receptor-associated protein-like 2                                                                                                                                                                                                                                          |
| Gale          | NM 178389        | chr4         | 135519667       | 135524093       | +        | BC027438        | galactose-4-epimerase, UDP                                                                                                                                                                                                                                                                                    |
| Gata1d        | NM 028033        | chr5         | 3639969         | 36479117        | +        | AB047921        | GATA zinc finger domain containing 1                                                                                                                                                                                                                                                                          |
| <b>Gclt1</b>  | <b>NM 008102</b> | <b>chr14</b> | <b>4773570</b>  | <b>47899881</b> | <b>+</b> | <b>BC006543</b> | <b>GTP cyclohydrolase 1</b>                                                                                                                                                                                                                                                                                   |
| <b>Gjb2</b>   | <b>NM 08125</b>  | <b>chr14</b> | <b>57717448</b> | <b>57723502</b> | <b>+</b> | <b>BC013634</b> | <b>gap junction protein, beta 2</b>                                                                                                                                                                                                                                                                           |
| Glsr2         | NM 133831        | chr7         | 16523184        | 16531407        | +        | BC017637        | glioma tumor suppressor candidate region gene 2                                                                                                                                                                                                                                                               |
| Gm872         | NM 201354        | chr18        | 75590859        | 75857208        | +        | BC058104        | gene model 672, (NCBI)                                                                                                                                                                                                                                                                                        |
| Gna11         | NM 010301        | chr10        | 80991477        | 81007791        | +        | BC011169        | guanine nucleotide binding protein, alpha 11                                                                                                                                                                                                                                                                  |
| Gne           | NM 015828        | chr4         | 44049698        | 44097038        | +        | BC015277        | glucosamine                                                                                                                                                                                                                                                                                                   |
| Gorasp2       | NM 027352        | chr2         | 17499833        | 17529800        | +        | AF005900        | golgi assembly stacking protein 2                                                                                                                                                                                                                                                                             |
| Gosr2         | NM 019650        | chr11        | 103538163       | 103559008       | +        | BC051253        | golgi SNAP receptor complex member 2                                                                                                                                                                                                                                                                          |
| Gpd1          | NM 010271        | chr15        | 99548018        | 99555439        | +        | BC019391        | glycerol 3-phosphate dehydrogenase 1 (soluble)                                                                                                                                                                                                                                                                |
| Gps1          | NM 145370        | chr11        | 120645589       | 120650416       | +        | BC103782        | G protein pathway suppressor 1                                                                                                                                                                                                                                                                                |
| Gsta3         | NM 0010773       | chr1         | 21230670        | 21255640        | +        | M73483          | glutathione S-transferase, alpha 3                                                                                                                                                                                                                                                                            |
| <b>Gtse1</b>  | <b>NM 133801</b> | <b>chr17</b> | <b>57142825</b> | <b>57150841</b> | <b>+</b> | <b>BC031123</b> | <b>general transcription factor IIF, polypeptide 1</b>                                                                                                                                                                                                                                                        |
| H2afv         | NM 130751        | chr11        | 8328141         | 8328359         | +        | BC030447        | H2A histone family, member V                                                                                                                                                                                                                                                                                  |
| H2afx         | NM 010436        | chr9         | 44142777        | 44144160        | +        | BC010336        | H2A histone family, member X                                                                                                                                                                                                                                                                                  |
| Hepd          | NM 173371        | chr4         | 14935384        | 149383132       | +        | BC042677        | hexose-6-phosphate dehydrogenase (glucose 1-dehydrogenase)                                                                                                                                                                                                                                                    |
| Hagh          | NM 024284        | chr17        | 24987492        | 25001395        | +        | BC019817        | hydroxyacyl glutathione hydrolase                                                                                                                                                                                                                                                                             |
| Hapln1        | NM 013500        | chr13        | 89679401        | 89751257        | +        | BC066853        | hyaluronan and proteoglycan link protein 1                                                                                                                                                                                                                                                                    |
| Hsp1          | NM 153190        | chr12        | 32611325        | 32635088        | +        | BC028653        | high mobility group box transcription factor 1                                                                                                                                                                                                                                                                |
| Hsp9b         | NM 024267        | chr6         | 12316046        | 12318048        | +        | BC031849        | histone H4 dehydrogenase-like hydrolase domain containing 3                                                                                                                                                                                                                                                   |
| Hectd1        | NM 019024        | chr12        | 52845511        | 52930295        | +        | AK173106        | HECT domain containing 1                                                                                                                                                                                                                                                                                      |
| Hepud1        | NM 022331        | chr8         | 96910400        | 96919259        | +        | BC013523        | homocysteine-inducible, endoplasmic reticulum stress-inducible, ubiquitin-like domain member 1                                                                                                                                                                                                                |
| Higd1a        | NM 0011226       | chr3         | 85719644        | 85720101        | +        | BC021594        | HIG1 domain family, member 1A   similar to hypoxia induced gene 1                                                                                                                                                                                                                                             |
| Hint2         | NM 026871        | chr4         | 43667099        | 43669322        | +        | BC086940        | histidine triad nucleotide binding protein 2                                                                                                                                                                                                                                                                  |
| Hn2           |                  |              |                 |                 |          |                 |                                                                                                                                                                                                                                                                                                               |
| Hist1h2bc     | NM 023422        | chr13        | 23776068        | 23784357        | +        | BC019673        | histone cluster 1, H2bc   histone cluster 1, H2bb   histone cluster 1, H2be   histone cluster 1, H2bg   H2b histone family, member A   H2b histone                                                                                                                                                            |
| Hist2hc1      | NM 178216        | chr3         | 96050608        | 96052427        | +        | BC132488        | histone cluster 2, H3c1   histone cluster 2, H3b   histone cluster 2, H3c2   histone cluster 1, H3b   histone cluster 1, H3e   histone cluster 1, H3e   histone cluster 2, H3c1   histone cluster 2, H3b   histone cluster 2, H3c2   histone cluster 1, H3b   histone cluster 1, H3e   histone cluster 1, H3e |
| Hist2hc3c1    | NM 178216        | chr3         | 96050608        | 96052427        | +        | BC132488        | histone cluster 2, H3c1   histone cluster 2, H3b   histone cluster 2, H3c2   histone cluster 1, H3b   histone cluster 1, H3e   histone cluster 1, H3e                                                                                                                                                         |
| Hmgcs1        | NM 145942        | chr13_random | 114527          | 132341          | +        | BC029693        | 3-hydroxy-3-methylglutaryl-Coenzyme A synthase 1   similar to Hmgcs1 protein                                                                                                                                                                                                                                  |
| Hmox2         | NM 010443        | chr16        | 4726389         | 4766249         | +        | BC020211        | heme oxygenase (decycling) 2                                                                                                                                                                                                                                                                                  |
| Hnnpa3        | NM 146130        | chr2         | 75497334        | 75507484        | +        | BC023908        | heterogeneous nuclear ribonucleoprotein A3                                                                                                                                                                                                                                                                    |
| Hnnpab        | NM 0010480       | chr11        | 51413602        | 51420383        | +        | BC043069        | heterogeneous nuclear ribonucleoprotein A/B                                                                                                                                                                                                                                                                   |
| Hnnp          |                  |              |                 |                 |          |                 |                                                                                                                                                                                                                                                                                                               |
| Hnnpd         | NM 016690        | chr5         | 100463740       | 100468181       | +        | BC021374        | heterogeneous nuclear ribonucleoprotein D-like                                                                                                                                                                                                                                                                |
| Hnnp1         |                  |              |                 |                 |          |                 |                                                                                                                                                                                                                                                                                                               |
| Hnnp2         | NM 133255        | chr8         | 87514502        | 87527256        | +        | BC080744        | hook homolog 2 (Drosophila)                                                                                                                                                                                                                                                                                   |
| Hnnp3         | NM 008278        | chr8         | 87773390        | 87798841        | +        | BC021157        | hydroxyprostaglandin dehydrogenase 15 (NAD)                                                                                                                                                                                                                                                                   |
| Hsd17b12      | NM 019657        | chr2         | 93872854        | 93980666        | +        | BC090659        | hydroxysteroid (17-beta) dehydrogenase 12                                                                                                                                                                                                                                                                     |
| Hsd17b7       | NM 010476        | chr1         | 171879668       | 171899336       | +        | BC011464        | hydroxysteroid (17-beta) dehydrogenase 7                                                                                                                                                                                                                                                                      |
| <b>Hspa4</b>  | <b>NM 008300</b> | <b>chr11</b> | <b>53073316</b> | <b>53113981</b> | <b>+</b> | <b>BC003770</b> | <b>heat shock protein 4</b>                                                                                                                                                                                                                                                                                   |
| Hspa4l        | NM 011020        | chr3         | 40549418        | 40594373        | +        | BC110662        | heat shock protein 4 like                                                                                                                                                                                                                                                                                     |
| Hspa5         | NM 022310        | chr2         | 34627510        | 34632049        | +        | BC050927        | heat shock protein 5                                                                                                                                                                                                                                                                                          |
| Hspa8         | NM 030704        | chr5         | 11685800        | 116872875       | +        | BC011219        | heat shock protein 8                                                                                                                                                                                                                                                                                          |
| Hspca         |                  |              |                 |                 |          |                 |                                                                                                                                                                                                                                                                                                               |
| Hspcb         |                  |              |                 |                 |          |                 |                                                                                                                                                                                                                                                                                                               |
| Hspcl         |                  |              |                 |                 |          |                 |                                                                                                                                                                                                                                                                                                               |
| Hyo1          | NM 021395        | chr9         | 44187626        | 44200452        | +        | AF228709        | hypoxia up-regulated 1                                                                                                                                                                                                                                                                                        |
| Ih1           | NM 010497        | chr11        | 85205202        | 85225688        | +        | BC088896        | isocitrate dehydrogenase 1 (NADP+), soluble                                                                                                                                                                                                                                                                   |
| Iid1          | NM 145360        | chr2         | 53553379        | 53555893        | +        | BC110313        | isopentenyl-diphosphate delta isomerase                                                                                                                                                                                                                                                                       |
| Iift1         | NM 008331        | chr19        | 34715379        | 34724499        | +        | BC003768        | interferon-induced protein with tetratricopeptide repeats 1                                                                                                                                                                                                                                                   |
| Igfals        | NM 008340        | chr17        | 25015715        | 25018953        | +        | AK220290        | insulin-like growth factor binding protein, acid labile subunit                                                                                                                                                                                                                                               |
| Igfb          | NM 018736        | chr11        | 58013058        | 58036285        | +        | U52191          | interferon gamma induced GTPase   interferon inducible GTPase 2                                                                                                                                                                                                                                               |
| Ikkg          | NM 178590        | chrX         | 71669951        | 71698659        | +        | AY112937        | inhibitor of kappaB kinase gamma                                                                                                                                                                                                                                                                              |
| Impdh2        | NM 011830        | chr6         | 102564392       | 102560744       | +        | M83394          | inosine 5-phosphate dehydrogenase 2                                                                                                                                                                                                                                                                           |
| Inhbc         | NM 010565        | chr10        | 126793376       | 126807600       | +        | U95962          | inhibin beta-C                                                                                                                                                                                                                                                                                                |
| Irak1         | NM 008363        | chrX         | 71259257        | 71269275        | +        | AY184362        | interleukin-1 receptor-associated kinase 1                                                                                                                                                                                                                                                                    |
| Irak2         | NM 172161        | chr6         | 113588482       | 113645005       | +        | BC085324        | interleukin-1 receptor-associated kinase 2                                                                                                                                                                                                                                                                    |
| Irgm          | NM 008326        | chr11        | 48678749        | 48684869        | +        | U19119          | immunity-related GTPase family, M                                                                                                                                                                                                                                                                             |
| Isg20         | NM 020583        | chr7         | 86058344        | 86065250        | +        | AF217484        | interferon-stimulated protein                                                                                                                                                                                                                                                                                 |
| Iitm1         |                  |              |                 |                 |          |                 |                                                                                                                                                                                                                                                                                                               |
| Itpk1         | NM 172584        | chr12        | 103806198       | 103943079       | +        | BC056464        | inositol 1,3,4-trisphosphate 5/6 kinase                                                                                                                                                                                                                                                                       |
| Jag1          | NM 026365        | chr6         | 1133925         |                 |          |                 |                                                                                                                                                                                                                                                                                                               |

|           |            |       |           |           |   |           |                                                                                                                                                       |
|-----------|------------|-------|-----------|-----------|---|-----------|-------------------------------------------------------------------------------------------------------------------------------------------------------|
| Kpna2     | NM_010655  | chr11 | 106849943 | 106660839 | - | D55720    | karyopherin (importin) alpha 2   similar to nuclear pore-targeting complex component of 58 kDa                                                        |
| Kpnb1     | NM_008379  | chr11 | 97021024  | 97049206  | - | BC055115  | karyopherin (importin) beta 1                                                                                                                         |
| Kras      | NM_021284  | chr6  | 145165227 | 145198751 | - | BC004642  | v-Ki-ras2 Kirsten rat sarcoma viral oncogene homolog   neuroblastoma ras oncogene                                                                     |
| Krt1-18   |            |       |           |           |   |           |                                                                                                                                                       |
| Krt2-8    |            |       |           |           |   |           |                                                                                                                                                       |
| Krt2-8    | NM_024434  | chr5  | 45848613  | 45903912  | + | AF_334160 | lecithin aminopeptidase 3                                                                                                                             |
| Ldlr      | NM_010700  | chr9  | 21528038  | 21554363  | + | BC053041  | low density lipoprotein receptor                                                                                                                      |
| Gal3b3p   | NM_011160  | chr11 | 118254063 | 118253733 | + | BC030958  | lectin, galactose-binding, soluble, 3 binding protein                                                                                                 |
| Gal3s1    | NM_010708  | chr11 | 78776481  | 78798353  | - | U55061    | lectin, galactose binding, soluble 9                                                                                                                  |
| Lims2     | NM_144862  | chr18 | 32091161  | 32118273  | + | BC101816  | LIM and senescent cell antigen like domains 2                                                                                                         |
| Lman1     | NM_027400  | chr18 | 66140408  | 66162266  | - | BC057165  | lectin, mannose-binding, 1                                                                                                                            |
| Lman2     | NM_025828  | chr13 | 55445194  | 55464144  | - | BC055327  | lectin, mannose-binding 2                                                                                                                             |
| LOC434401 |            |       |           |           |   |           |                                                                                                                                                       |
| LOC544800 |            |       |           |           |   |           |                                                                                                                                                       |
| Lrp4      | NM_172668  | chr2  | 91297858  | 91353936  | + | AF_247637 | low density lipoprotein receptor-related protein 4                                                                                                    |
| Lrrc3     | NM_145152  | chr10 | 77362592  | 77362555  | - | AY061858  | lecithin rich repeat containing 3                                                                                                                     |
| Lrrc5     |            |       |           |           |   |           |                                                                                                                                                       |
| Lss       | NM_146006  | chr10 | 75943363  | 76018226  | + | BC029082  | lanosterol synthase                                                                                                                                   |
| Mafk1     | NR_002847  | chr19 | 5800397   | 58005493  | - | BC004722  | metastasis associated lung adenocarcinoma transcript 1 (non-coding RNA)                                                                               |
| Man2a1    | NM_008549  | chr17 | 64893089  | 65104450  | + | BC009578  | mannosidase 2, alpha 1                                                                                                                                |
| Map11c3b  | NM_026160  | chr8  | 124114350 | 124121947 | + | BC086774  | microtubule-associated protein 1 light chain 3 beta                                                                                                   |
| Mbnl2     | NM_176341  | chr14 | 120674883 | 120830919 | + | BC075665  | muscleblind-like 2                                                                                                                                    |
| Mdm2      | NM_010786  | chr10 | 117125944 | 117147772 | - | BC092270  | transformed mouse 3T3 cell double minute 2                                                                                                            |
| Metap1    | NM_175224  | chr3  | 138121920 | 138152346 | - | BC096469  | methionyl aminopeptidase 1                                                                                                                            |
| Mif1ip1   | NM_028554  | chr12 | 56593308  | 56593392  | - | BC086754  | nucleic acid binding protein 1 (gasfracton specific G12-like (zebrafish))                                                                             |
| Mknk2     | NM_021462  | chr10 | 80128072  | 80138619  | - | AB184081  | MAP kinase-interacting serine/threonine kinase 2                                                                                                      |
| Mlx       | NM_011550  | chr11 | 100948624 | 100953521 | + | BC038004  | MAX-like protein X                                                                                                                                    |
| Mmap      | NM_029566  | chr5  | 114881043 | 114894036 | - | BC057558  | methylmalonic aciduria (cobalamin deficiency) type B homolog (human)                                                                                  |
| Morf4l2   | NM_019768  | chrX  | 133267481 | 133276148 | - | BC075653  | mortality factor 4 like 2                                                                                                                             |
| Morf4l2   | NM_019768  | chrX  | 133267481 | 133276148 | - | BC075653  | mortality factor 4 like 2                                                                                                                             |
| Nip1      |            |       |           |           |   |           |                                                                                                                                                       |
| Nrap      | NM_029844  | chr16 | 90738569  | 90750030  | + | BC027543  | melanocortin 2 receptor accessory protein                                                                                                             |
| Nrpl19    | NM_026490  | chr6  | 81907820  | 81915943  | - | BC043921  | mitochondrial ribosomal protein L19                                                                                                                   |
| Nrps22    | NM_025485  | chr9  | 98489149  | 98502078  | - | BC051198  | mitochondrial ribosomal protein S22                                                                                                                   |
| Nrps23    | NM_024174  | chr11 | 88017920  | 88025009  | + | BC019980  | mitochondrial ribosomal protein S23                                                                                                                   |
| Nrps31    | NM_020560  | chr8  | 23521854  | 23540137  | + | BC027430  | mitochondrial ribosomal protein S31                                                                                                                   |
| Nrps6     |            |       |           |           |   |           |                                                                                                                                                       |
| Nrps7     | NM_025305  | chr11 | 115465465 | 115468940 | + | BC049636  | mitochondrial ribosomal protein S7                                                                                                                    |
| Mut       | NM_008650  | chr17 | 41071656  | 41098598  | + | X51941    | methylmalonyl-Coenzyme A mutase                                                                                                                       |
| Mycbp     | NM_019660  | chr4  | 123582075 | 123589512 | + | BC028344  | c-myc binding protein                                                                                                                                 |
| Myf9      | NM_021019  | chr2  | 156801165 | 156607394 | - | BC049974  | myosin, light polypeptide 9, regulatory                                                                                                               |
| Naca      | NM_007113  | chr10 | 12747828  | 12749593  | + | U485923   | nucleic acid polypeptide-associated complex alpha polypeptide                                                                                         |
| Nadyev1   | NM_030221  | chr8  | 150981488 | 151008748 | - | AJ130534  | NAD synthetase 1                                                                                                                                      |
| Nars      | NM_027350  | chr18 | 64659309  | 64676191  | - | BC052849  | asparaginyl-tRNA synthetase                                                                                                                           |
| Ncbp2     | NM_026554  | chr16 | 31948701  | 31958433  | + | BC118926  | nuclear cap binding protein subunit 2                                                                                                                 |
| Nek6      | NM_021606  | chr2  | 38367217  | 38443561  | + | AF_218847 | NIMA (never in mitosis gene a)-related expressed kinase 6                                                                                             |
| Nelf      | NM_001039  | chr2  | 24909899  | 24919401  | + | BC006842  | nasal embryonic LHRH factor                                                                                                                           |
| Nfkbia    | NM_011960  | chr12 | 36593938  | 36593992  | - | BC086885  | nucleic acid binding protein 1 polypeptide gene enhancer in B-cells inhibitor, alpha                                                                  |
| Nola2     | NM_028631  | chr11 | 51433275  | 51437216  | + | BC024944  | nucleolar protein family A, member 2                                                                                                                  |
| Nsdhl     | NM_010941  | chrX  | 70163860  | 70203867  | + | AF_100198 | NAD(P) dependent steroid dehydrogenase-like                                                                                                           |
| Nubp2     | NM_011956  | chr17 | 25019562  | 25023293  | - | BC012635  | nucleotide binding protein 2                                                                                                                          |
| Nudt18    | NM_153136  | chr14 | 70977196  | 70982378  | + | BC036718  | nudix (nucleoside diphosphate linked moiety X)-type motif 18                                                                                          |
| Odc1      | NM_013614  | chr12 | 17551778  | 17557890  | + | BC083122  | ornithine decarboxylase, structural 1                                                                                                                 |
| Ogdh      | NM_139144  | chrX  | 38935403  | 38937690  | + | BC009519  | O-linked N-acetylglucosamine (GlcNAc) transferase (UDP-N-acetylglucosamine:polypeptide-N-acetylglucosaminyl transferase)                              |
| Opa3      | NM_207525  | chr7  | 19813702  | 19841178  | + | BC094601  | optic atrophy 3 (human)                                                                                                                               |
| Opr3      | NM_011014  | chr4  | 41685369  | 41688186  | - | BC002000  | opioid receptor, sigma 1                                                                                                                              |
| ORF61     | NM_0010039 | chr10 | 79438635  | 79447075  | - | BC080302  | open reading frame 61                                                                                                                                 |
| P2rx4     | NM_011026  | chr5  | 123167566 | 123179053 | + | AF_069751 | purinergic receptor P2X, ligand-gated ion channel 4                                                                                                   |
| Pcmid2    | NM_153594  | chr2  | 181572608 | 181592157 | + | BC040385  | protein L-isopartate (D-aspartate) O-methyltransferase domain containing 2                                                                            |
| Pcnp      | NM_0010246 | chr15 | 86156321  | 86159363  | + | BC030885  | PcS1 protein 2 domain containing nuclear protein                                                                                                      |
| Pcsk9     | NM_153565  | chr4  | 106114947 | 106136934 | + | BC038085  | proprotein convertase subtilisin/kexin type 9                                                                                                         |
| Pdcd6     | NM_011051  | chr13 | 74440576  | 74454725  | - | BC040079  | programmed cell death 6                                                                                                                               |
| Pdia3     | NM_007952  | chr2  | 121239638 | 121264423 | + | BC033439  | protein disulfide isomerase associated 3                                                                                                              |
| Pdia4     | NM_009787  | chr6  | 47746140  | 47763511  | - | J01186    | protein disulfide isomerase associated 4                                                                                                              |
| Pdia6     | NM_021959  | chr12 | 17273401  | 17291761  | + | BC006855  | protein disulfide isomerase associated 6                                                                                                              |
| Pdlim1    | NM_016861  | chr19 | 40295663  | 40346023  | + | AF_053367 | PDZ and LIM domain 1 (elfin)                                                                                                                          |
| Peci      | NM_011868  | chr13 | 35069617  | 35085985  | - | AF_153613 | peroxisomal delta3, delta2-enoyl-Coenzyme A isomerase                                                                                                 |
| Pex11a    | NM_011068  | chr7  | 86882135  | 86887911  | - | AF_093669 | peroxisomal biogenesis factor 11a                                                                                                                     |
| Pgd       | NM_0010812 | chr4  | 148524102 | 148540740 | + | BC006846  | phosphogluconate dehydrogenase                                                                                                                        |
| Pgm1      | NM_023371  | chr9  | 20456574  | 20471028  | + | BC038254  | protein (peptidyl)prolyl cis/trans isomerase) NIMA-interacting 1                                                                                      |
| Pgdc3     | NM_011961  | chr12 | 137426889 | 137429197 | + | BC006847  | procollagen-lysine 2-oxoglutarate 5-dioxygenase 3                                                                                                     |
| Pmm2      | NM_016881  | chr16 | 8637800   | 8657642   | + | BC044448  | phosphomannomutase 2                                                                                                                                  |
| Pmvk      | NM_026784  | chr3  | 89258463  | 89272931  | + | BC028659  | phosphomevalonate kinase                                                                                                                              |
| Plp1a2    | NM_025802  | chr7  | 148641105 | 148646642 | + | BC019188  | patatin-like phospholipase domain containing 2                                                                                                        |
| Polb      | NM_011130  | chr8  | 23738598  | 23763907  | + | BC060998  | polymerase (DNA directed), beta                                                                                                                       |
| Polr2a    | NM_025862  | chr6  | 82639704  | 82602857  | - | BC023189  | polymerase (DNA-directed), epsilon 4 (p12 subunit)                                                                                                    |
| Polr2b    | NM_021754  | chr7  | 310117083 | 310184068 | + | BC006852  | polymerase (DNA-directed), epsilon 2 (p10 subunit)                                                                                                    |
| Polr2c    | NM_145145  | chr2  | 32092143  | 32110525  | + | BC027325  | polymerase (DNA-directed) polypeptide I similar to RNA Polymerase II subunit 14.5 kD                                                                  |
| Por       | NM_008988  | chr5  | 136165028 | 136211196 | + | BC003240  | P450 (cytochrome) oxidoreductase                                                                                                                      |
| Ppa1      | NM_026439  | chr10 | 61111369  | 61136916  | + | BC101468  | pyrophosphatase (inorganic) 1                                                                                                                         |
| Ppip1     | NM_026845  | chr17 | 29387773  | 29400916  | - | BC058369  | peptidylprolyl isomerase (cyclophilin)-like 1   similar to peptidylprolyl isomerase-like 1                                                            |
| Ppp1r12a  | NM_027892  | chr19 | 100699248 | 100714631 | + | BC059119  | protein phosphatase 1, regulatory (inhibitor subunit) 12A                                                                                             |
| Ppp1r14b  | NM_008889  | chr19 | 70453538  | 70519114  | + | BC013265  | protein phosphatase 1, regulatory (inhibitor subunit) 14B                                                                                             |
| Ppp3ca    | NM_008913  | chr3  | 136333734 | 136600350 | + | J05479    | protein phosphatase 3, catalytic subunit, alpha isoform                                                                                               |
| Psmc4     | NM_011874  | chr7  | 28826271  | 28835088  | - | BC092265  | proteasome (prosome, macropain) 26S subunit, ATPase, 4                                                                                                |
| Psmc5     | NM_008950  | chr11 | 106117468 | 106124434 | + | BC030840  | protease (prosome, macropain) 26S subunit, ATPase 5                                                                                                   |
| Psmc1     | NM_027357  | chr1  | 87961194  | 88033870  | + | BC030840  | protease (prosome, macropain) 26S subunit, non-ATPase, 1                                                                                              |
| Psmc6     | NM_025550  | chr14 | 14844598  | 14851725  | + | BC008689  | protease (prosome, macropain) 26S subunit, non-ATPase, 6                                                                                              |
| Psmc3     | NM_011192  | chr11 | 10117565  | 10118485  | + | D87911    | proteasome (prosome, macropain) 26S subunit, 3                                                                                                        |
| Psmc2     | NM_026873  | chr13 | 100089604 | 100114642 | + | BC025110  | pentameric peptide repeat domain 2                                                                                                                    |
| Ptdsr     |            |       |           |           |   |           |                                                                                                                                                       |
| Ptges3    | NM_019766  | chr10 | 127496011 | 127514328 | + | BC085264  | prostaglandin H synthase 3 (cytosolic)   similar to Sid3177p                                                                                          |
| Pima      | NM_008972  | chr1  | 88423300  | 88427273  | + | BC085171  | prothymosin alpha                                                                                                                                     |
| Pipr1     | NM_025976  | chr2  | 92163870  | 92174637  | + | BC059519  | protein tyrosine phosphatase, mitochondrial 1                                                                                                         |
| Pipr11    | NM_011202  | chr5  | 121580550 | 121641384 | - | BC057398  | protein tyrosine phosphatase, non-receptor type 11                                                                                                    |
| Pipr2     | NM_011211  | chr4  | 75587143  | 76242023  | - | AF_326559 | protein tyrosine phosphatase, receptor type, D                                                                                                        |
| Pipr3     | NM_011213  | chr4  | 117880818 | 117964002 | - | AF_300943 | protein tyrosine phosphatase, receptor type, F                                                                                                        |
| Rabag12   | NM_019519  | chr14 | 56334714  | 56341018  | + | AF_127658 | Rab geranylgeranyl transferase, a subunit                                                                                                             |
| Raf2      | NM_018740  | chr15 | 69181726  | 69494012  | + | AF_064197 | retinoid acid induced 12                                                                                                                              |
| Ran       | NM_003931  | chr5  | 29533508  | 29530196  | - | BC038356  | RAN, member RAS oncogene family   similar to RAN, member RAS oncogene family                                                                          |
| Ranbp1    | NM_011239  | chr16 | 18239880  | 18248806  | - | BC081140  | RAN binding protein 1                                                                                                                                 |
| Rangap1   | NM_011241  | chr15 | 81534883  | 81560331  | - | U08110    | RAN GTPase activating protein 1                                                                                                                       |
| Rbed1     | NM_144917  | chr6  | 72515919  | 72548337  | - | BC016193  | RNA binding motif and ELM0 domain 1                                                                                                                   |
| Rbm14     | NM_019869  | chr19 | 48005669  | 4811634   | - | BC010294  | RNA binding motif protein 14                                                                                                                          |
| Rbm4      | NM_009482  | chr16 | 45436151  | 45543902  | - | BC130326  | RNA binding motif protein 4                                                                                                                           |
| Rcd1      | NM_021525  | chr19 | 29175865  | 29218419  | + | BC004574  | RNA terminal phosphate cyclase-like 1                                                                                                                 |
| Rdh11     | NM_021557  | chr12 | 80275262  | 80293280  | - | AF_474027 | retinol dehydrogenase 11                                                                                                                              |
| Rpl71     | NM_025433  | chr17 | 46910856  | 46919605  | - | BC030165  | ribosomal protein L7-like 1                                                                                                                           |
| Rpn1      | NM_133933  | chr6  | 88034505  | 88055298  | - | BC016080  | ribophorin 1                                                                                                                                          |
| Rwd3a4    | NM_203507  | chr8  | 48619046  | 48638179  | + | BC016198  | RWD domain containing 4A                                                                                                                              |
| ST00a10   | NM_009112  | chr3  | 93359039  | 93368567  | + | BC025044  | ST00 calcium binding protein A10 (calpactin)                                                                                                          |
| Sc4mol    | NM_025436  | chr8  | 67196836  | 67212375  | - | BC006802  | sterol-C4-methyl oxidase-like                                                                                                                         |
| Sc5d      | NM_172769  | chr9  | 42062260  | 42072339  | - | BC024132  | sterol-C5-desaturase (fungal ERG3, delta-5-desaturase) homolog (S. cerevisiae)                                                                        |
| Sdc1      | NM_011519  | chr12 | 8778197   | 8800494   | + | BC010560  | syndecan 1                                                                                                                                            |
| Sdcap3    | NM_026563  | chr2  | 26238322  | 26244826  | - | BC031199  | serologically defined colon cancer antigen 3                                                                                                          |
| Sdc21     | NM_022324  | chr16 | 17130231  | 17132458  | - | BC053425  | stromal cell-derived factor 2-like 1                                                                                                                  |
| Sec13l1   |            |       |           |           |   |           |                                                                                                                                                       |
| Sec23b    | NM_019787  | chr2  | 144382013 | 144416480 | + | BC011160  | SEC23B (S. cerevisiae)                                                                                                                                |
| Sec61a1   | NM_016906  | chr6  | 88453597  | 88468806  | - | BC003707  | Sec61 alpha 1 subunit (S. cerevisiae)                                                                                                                 |
| Senp3     | NM_030702  | chr11 | 69486812  | 69495586  | - | AY008764  | SUMO/sentrin specific peptidase 3                                                                                                                     |
| Serpinid1 | NM_008223  | chr16 | 17331508  | 17343667  | + | BC009519  | serine (or cysteine) peptidase inhibitor, clade D, member 1                                                                                           |
| Set       | NM_023871  | chr2  | 28917563  | 28927315  | + | BC101255  | SET1 translocation 1 similar to protein phosphatase 2A inhibitor 2:1-2PPP2A                                                                           |
| Sfpq      | NM_023603  | chr4  | 126698579 | 126708040 | - | BC089305  | splicing factor proline/glutamine rich (polyprolymidine tract binding protein associated)                                                             |
| Sfrs1     | NM_173741  | chr11 | 87861173  | 87867259  | + | BC046773  | splicing factor, arginine/serine-rich 1 (ASF/SF2)   similar to splicing factor, arginine/serine-rich 1 (splicing factor 2, alternate splicing factor) |
| Sfrs2     | NM_011358  | chr11 | 116711215 | 116714405 | - | AF_077858 | splicing factor, arginine/serine-rich 2 (SC-35)                                                                                                       |
| Sfrs3     | NM_013663  | chr17 | 29169818  | 29180311  | + | BC071196  | splicing factor, arginine/serine-rich 3 (SRp20)                                                                                                       |
| Sfm4      | NM_009482  | chr16 | 45436151  | 45543902  | - | BC130326  | src-homology 2 domain-containing transforming protein B                                                                                               |
| Sic17a3   | NM_134069  | chr13 | 29331329  | 29351623  | + | BC034183  | solute carrier family 17 (sodium phosphate), member 3                                                                                                 |
| Sic25a15  | NM_181255  | chr8  | 23486479  | 23509025  | - | AF_133914 | solute carrier family 25 (mitochondrial carrier ornithine transporter), member 15                                                                     |
| Sic25a17  | NM_011399  | chr15 | 81149345  | 81191204  | - | AJ006341  | solute carrier family 25 (mitochondrial carrier, peroxisomal membrane protein), member 17                                                             |
| Sic25a5   | NM_007451  | chr1  | 79919111  | 79920062  | - | X70847    | solute carrier family 25 (mitochondrial carrier, adenine nucleotide translocator), member 5   predicted gene, EG433923                                |
| Sic27a2   | NM_011978  | chr2  | 126378760 | 126413979 | + | BC022170  | solute carrier family 27 (fatty acid transporter), member 2                                                                                           |
| Sic30a10  | NM_0010327 | chr1  | 18278127  | 18292841  | - | BC054548  | solute carrier family 30, member 10                                                                                                                   |
| Sic35b1   | NM_016752  | chr11 | 95246236  | 95252983  | - | D87990    | solute carrier family 35, member B1                                                                                                                   |
| Smacr1    | NM_011418  | chr10 | 75359518  | 75384341  | - | AB041578  | SWI/SNF related, matrix associated, actin dependent regulator of chromatin, subfamily b, member 1                                                     |
| Snrpd3    | NM_026095  | chr10 | 74980766  | 74998210  | + | BC011510  | small nuclear ribonucleoprotein D3                                                                                                                    |
| Snrp1     |            |       |           |           |   |           |                                                                                                                                                       |

|              |                  |              |                  |                  |   |                 |                                                                                             |
|--------------|------------------|--------------|------------------|------------------|---|-----------------|---------------------------------------------------------------------------------------------|
| Srpb         | NM_009275        | chr9         | 103090363        | 103104416        | - | BC003798        | signal recognition particle receptor, B subunit                                             |
| Ssh2         | NM_177710        | chr11        | 77029927         | 77269050         | + | AB099288        | slingshot homolog 2 (Drosophila)                                                            |
| Ssr1         | NM_025965        | chr13        | 38058474         | 38086026         | - | AF326229        | signal sequence receptor, alpha                                                             |
| Ssr2         | NM_025448        | chr3         | 83838363         | 83923338         | + | BC010214        | signal sequence receptor, beta                                                              |
| <b>St13</b>  | <b>NM_133726</b> | <b>chr15</b> | <b>81195470</b>  | <b>81230124</b>  | - | <b>BC003843</b> | <b>suppression of tumorigenicity 13</b>                                                     |
| St3gal1      | NM_009177        | chr15        | 66934437         | 67008444         | - | BC096993        | ST3 beta-galactoside alpha-2,3-sialyltransferase 1                                          |
| St3gal5      | NM_011375        | chr6         | 72047607         | 72104564         | + | AF119416        | ST3 beta-galactoside alpha-2,3-sialyltransferase 5                                          |
| Star5        | NM_023377        | chr7         | 90780510         | 90798038         | + | BC058226        | STAR-related lipid transfer (START) domain containing 5                                     |
| Stat1        | NM_009283        | chr1         | 52176282         | 52218707         | + | BC004808        | signal transducer and activator of transcription 1                                          |
| Stat2        | NM_019863        | chr10        | 127707629        | 127729050        | + | AF206182        | signal transducer and activator of transcription 2                                          |
| Stch         | NM_030201        | chr16        | 75755433         | 75767023         | - | BC085181        | stress 70 protein chaperone, microsome-associated, human homolog                            |
| Stp1         | NM_016737        | chr19        | 7095192          | 7114801          | - | BC003794        | stress-induced phosphoprotein 1                                                             |
| Sup4h1       | NM_009296        | chr11        | 87561055         | 87567119         | + | BC087923        | suppressor of Ty 4 homolog 1 (S. cerevisiae)   suppressor of Ty 4 homolog 2 (S. cerevisiae) |
| Surf4        | NM_011512        | chr2         | 26775559         | 26789448         | - | M63114          | surflet gene 4                                                                              |
| Syncrip      | NM_019796        | chr9         | 83343576         | 83372235         | - | AF003821        | synaptotagmin binding, cytoplasmic RNA interacting protein                                  |
| Synpr2       | NM_009304        | chr11        | 117670991        | 117675597        | + | AF151985        | synaptogyrin 2                                                                              |
| Tacc1        | NM_177089        | chr8         | 26265024         | 26311921         | - | AY177413        | transforming, acidic coiled-coil containing protein 1                                       |
| Taf12        | NM_025679        | chr4         | 131830328        | 131849242        | + | BC019668        | TAF12 RNA polymerase II, TATA box binding protein (TBP)-associated factor                   |
| Tardbp       | NM_145556        | chr4         | 147986491        | 148001105        | - | BC025544        | TAR DNA binding protein                                                                     |
| Tbcd1d17     | NM_0010426       | chr7         | 52096146         | 52104449         | - | BC017607        | TBC1 domain family, member 17                                                               |
| Tcst         | NM_025669        | chr15        | 99223417         | 99240474         | + | BC005586        | testis enhanced gene transcript                                                             |
| Tfrc         | NM_011838        | chr16        | 32609103         | 32632876         | + | BC054522        | transferrin receptor                                                                        |
| Tgm2         | NM_009373        | chr2         | 157942138        | 157972128        | - | BC016492        | transglutaminase 2, C polypeptide                                                           |
| Thoc1        | NM_153552        | chr18        | 9958006          | 9959482          | + | BC024951        | THO complex 1                                                                               |
| Thrap6       | NM_009381        | chr7         | 104561454        | 104566620        | - | BC009165        | thyroid hormone responsive SPOT14 homolog (Rattus)                                          |
| Timm22       | NM_019818        | chr11        | 76220681         | 76229794         | + | AF223550        | translocase of inner mitochondrial membrane 22 homolog (yeast)                              |
| Timp3        | NM_011595        | chr10        | 85763282         | 85812253         | + | BC014713        | tissue inhibitor of metalloproteinase 3                                                     |
| Tmed3        | NM_025360        | chr9         | 89594043         | 89598829         | - | BC023338        | transmembrane emp24 domain containing 3                                                     |
| Tmem41b      | NM_153525        | chr7         | 117115701        | 117129768        | - | BC086759        | transmembrane protein 41B                                                                   |
| Tmem7        |                  |              |                  |                  |   |                 |                                                                                             |
| Tnnc1        | NM_009393        | chr14        | 32021498         | 32024898         | + | BC061172        | troponin C, cardiac/slow skeletal                                                           |
| Tnrc15       |                  |              |                  |                  |   |                 |                                                                                             |
| Tora1        | NM_144884        | chr2         | 30816147         | 30823411         | - | BC017683        | torsin family 1, member A (torsin A)                                                        |
| <b>Tpi1</b>  | <b>NM_009415</b> | <b>chr6</b>  | <b>124760733</b> | <b>124764430</b> | - | <b>BC046761</b> | <b>triosephosphate isomerase 1</b>                                                          |
| Trat1        |                  |              |                  |                  |   |                 |                                                                                             |
| Tram2        | NM_177409        | chr1         | 20991459         | 21089306         | - | BC018212        | translocating chain-associating membrane protein 2                                          |
| Tsc22d3      | NM_0010773       | chrX         | 137074067        | 137135611        | - | BC026813        | TSC22 domain family 3                                                                       |
| Tst          | NM_009437        | chr15        | 78229695         | 78236295         | - | BC005644        | thiosulfate sulfurtransferase, mitochondrial                                                |
| Ttca9c       | NM_027412        | chr19        | 8883565          | 8893784          | - | BC043061        | tetratricopeptide repeat domain 9C                                                          |
| Tuba4        |                  |              |                  |                  |   |                 |                                                                                             |
| Tuba6        |                  |              |                  |                  |   |                 |                                                                                             |
| Tubb2        |                  |              |                  |                  |   |                 |                                                                                             |
| Tubp1        | NM_134024        | chr11        | 100981445        | 100987733        | + | AB158480        | tubulin, gamma 1                                                                            |
| Tundc14      | NM_025868        | chr17        | 87477611         | 87478498         | - | BC110594        | thioredoxin domain containing 14                                                            |
| Tundc4       | NM_029572        | chr4         | 48203584         | 48292461         | - | AK172973        | thioredoxin domain containing 4 (endoplasmic reticulum)                                     |
| Tundc5       | NM_145367        | chr13        | 38592135         | 38620329         | - | AY243534        | thioredoxin domain containing 5                                                             |
| Ube1c        |                  |              |                  |                  |   |                 |                                                                                             |
| Ube1dc1      |                  |              |                  |                  |   |                 |                                                                                             |
| <b>Ube2n</b> | <b>NM_080560</b> | <b>chr10</b> | <b>94977796</b>  | <b>95008292</b>  | + | <b>BC067069</b> | <b>ubiquitin-conjugating enzyme E2N</b>                                                     |
| Ube2v1       | NM_023230        | chr2         | 167433139        | 167459299        | - |                 | ubiquitin-conjugating enzyme E2 variant 1                                                   |
| Ubqln1       | NM_152234        | chr13        | 58277523         | 58316997         | - | BC026847        | ubiquilin 1                                                                                 |
| Ubx2         | NM_026390        | chr1         | 130140739        | 130175954        | + | BC019795        | UBX domain containing 2                                                                     |
| Ugj2b34      | NM_153598        | chr5         | 87318792         | 87335962         | - | BC028626        | UDP-glucuronosyltransferase 2 family, polypeptide B34                                       |
| Unc50        | NM_026123        | chr1         | 37487017         | 37495669         | + | AY017214        | unc-50 homolog (C. elegans)                                                                 |
| Upp2         | NM_029692        | chr2         | 58419798         | 58645381         | + | BC027189        | uridine phosphorylase 2                                                                     |
| Usp2         | NM_198092        | chr9         | 43875104         | 43903710         | + | AY255637        | ubiquitin specific peptidase 2                                                              |
| Usp39        | NM_138592        | chr6         | 72268670         | 72295169         | - | BC026983        | ubiquitin specific peptidase 39                                                             |
| Uxs1         | NM_026430        | chr1         | 43806132         | 43884593         | - | BC037049        | UDP-glucuronate decarboxylase 1                                                             |
| Wbp4         | NM_018765        | chr14        | 79859744         | 79881354         | - | AF071184        | WW domain binding protein 4                                                                 |
| Wdr45        | NM_172372        | chrX         | 7299350          | 7303327          | + | BC011479        | WD repeat domain 45                                                                         |
| Xpo1         | NM_134014        | chr11        | 23156041         | 23197597         | + | BC062912        | exportin 1, CRM1 homolog (yeast)                                                            |
| Xm2          | NM_011917        | chr2         | 146838755        | 146903736        | + | BC054743        | 5'-3' exonuclease 2                                                                         |
| Ypel3        | NM_026875        | chr7         | 133920489        | 133924024        | + | AF523353        | yippee-like 3 (Drosophila)                                                                  |
| Ythd2        | NM_145393        | chr4         | 131741972        | 131768171        | - | BC014797        | YTH domain family 2                                                                         |
| Z22033       |                  |              |                  |                  |   |                 |                                                                                             |
| Zfp532       | NM_207255        | chr18        | 65739884         | 65848595         | + | BC094671        | zinc finger protein 532                                                                     |
| Zfp574       | NM_175477        | chr7         | 25862284         | 25867500         | + | BC059044        | zinc finger protein 574                                                                     |
| Zhx3         | NM_177263        | chr2         | 160596183        | 160698726        | - | BC058111        | zinc fingers and homeoboxes 3                                                               |
| Zranb1       | NM_207302        | chr7         | 140141305        | 140175634        | + |                 | zinc finger, RAN-binding domain containing 1                                                |
